# Supplementary material
Source: PubMed Central journal article supplement (PMC4527942)

## Supplemental material for “A large multi-ethnic genome-wide association study of prostate cancer identifies two novel risk variants and ethnic differences”

Thomas J. Hoffmann,<sup>1,2</sup> Stephen K. Van Den Eeden,<sup>3,4</sup> Lori C. Sakoda,<sup>3</sup> Eric Jorgenson,<sup>3</sup> Laurel A. Habel,<sup>3</sup> Rebecca E. Graff,<sup>1</sup> Michael N. Passarelli,<sup>1</sup> Clinton L. Cario,<sup>1</sup> Nima C. Emami,<sup>1</sup> Chun R. Chao,<sup>5</sup> Nirupa R. Ghai,<sup>5</sup> Jun Shan,<sup>3</sup> Dilrini K. Ranatunga,<sup>3</sup> Charles P. Quesenberry,<sup>3</sup> David Aaronson,<sup>6</sup> Joseph Presti,<sup>6</sup> Wang Zhaoming,<sup>7</sup> Sonja I. Berndt,<sup>7</sup> Stephen J. Chanock,<sup>7</sup> Shannon K. McDonnell,<sup>8</sup> Amy J French,<sup>9</sup> Daniel J Schaid,<sup>8</sup> Stephen N. Thibodeau,<sup>9</sup> Qiyuan Li,<sup>10</sup> Matthew L. Freedman,<sup>11</sup> Kathryn L. Penney,<sup>12</sup> Lorelei A. Mucci,<sup>12</sup> Christopher A. Haiman,<sup>13</sup> Brian E. Henderson,<sup>13</sup> Daniela Seminara,<sup>14</sup> Mark N. Kvale,<sup>2</sup> Pui-Yan Kwok,<sup>2</sup> Catherine Schaefer,<sup>3</sup> Neil Risch,<sup>1,2,3</sup> and John S. Witte<sup>1,2,4,15</sup>

<sup>1</sup>Department of Epidemiology and Biostatistics, University of California San Francisco, San Francisco, CA 94158, USA

<sup>2</sup>Institute for Human Genetics, University of California San Francisco, San Francisco, CA, 94143 USA

<sup>3</sup>Division of Research, Kaiser Permanente, Northern California, Oakland, CA 94612, USA

<sup>4</sup>Department of Urology, University of California San Francisco, San Francisco, CA 94158, USA

<sup>5</sup>Department of Research and Evaluation, Kaiser Permanente Southern California, Pasadena CA 91101, USA

<sup>6</sup>Department of Urology, Kaiser Oakland Medical Center, Northern California, Oakland, CA 94612, USA

<sup>7</sup>Laboratory of Translational Genomics, Division of Cancer Epidemiology and Genetics, Department of Health and Human Services, National Cancer Institute, National Institutes of Health, Bethesda MD, USA.

<sup>8</sup>Department of Health Science Research, Mayo Clinic, Rochester MN

<sup>9</sup>Department of Laboratory Medicine and Pathology, Mayo Clinic, Rochester MN

<sup>10</sup>Medical College, Xiamen University, Xiamen China 361102

<sup>11</sup>Department of Medical Oncology, Dana-Farber Cancer Institute and Harvard Medical School, Boston, MA 02115 and Center for Functional Cancer Epigenetics, Dana-Farber Cancer Institute, Boston, MA and The Eli and Edythe L. Broad Institute, Cambridge, MA

<sup>12</sup>Department of Epidemiology, Harvard T.H. Chan School of Public Health, Boston, MA and Channing Division of Network Medicine, Department of Medicine, Brigham and Women’s Hospital and Harvard Medical School, Boston, MA

<sup>13</sup>Department of Preventive Medicine, Keck School of Medicine and Norris Comprehensive Cancer Center, University of Southern California, Los Angeles, CA

<sup>14</sup>National Cancer Institute, National Institutes of Health, Bethesda, MD

<sup>15</sup>UCSF Helen Diller Family Comprehensive Cancer Center, University of California San Francisco, San Francisco, CA 94158, USA

### List of Tables

|    |                                                                                          |   |
|----|------------------------------------------------------------------------------------------|---|
| S1 | Descriptive factors for KP study population, broken down by study . . . . .              | 2 |
| S2 | Genome-wide significant SNPs found in our cohort . . . . .                               | 3 |
| S3 | Cis-eQTL expression of rs4646284 . . . . .                                               | 6 |
| S4 | Results at the 105 loci previously found to be associated with prostate cancer . . . . . | 7 |
| S5 | Risk score of and variance explained by the 105 previously reported hits . . . . .       | 9 |

### List of Figures

|    |                                                                              |    |
|----|------------------------------------------------------------------------------|----|
| S1 | Manhattan and Q-Q plots of each race/ethnicity and meta-analysis . . . . .   | 10 |
| S2 | Local plots of novel replicated rs4646284 and suggestive rs2659124 . . . . . | 46 |
| S3 | Cis-eQTL of SLC22A1 and SLC22A3 . . . . .                                    | 50 |
| S4 | Comparison of ORs of KP to previous reports by race/ethnicity . . . . .      | 52 |
| S5 | KP AUC estimates . . . . .                                                   | 53 |

**Table S1:** Descriptive factors for KP study population, broken down by study, used in the genome-wide association study of prostate cancer.

|                     | RPGEH    |        |          |       | Men's Health Study |        |          |       | Pro Health Study |        |          |        |
|---------------------|----------|--------|----------|-------|--------------------|--------|----------|-------|------------------|--------|----------|--------|
|                     | Cases    |        | Controls |       | Cases              |        | Controls |       | Cases            |        | Controls |        |
|                     | N        | %      | N        | %     | N                  | %      | N        | %     | N                | %      | N        | %      |
| Total               | 4640     |        | 27601    |       | 2743               |        | 10903    |       | 400              |        | 91       |        |
| Race/ethnicity:     |          |        |          |       |                    |        |          |       |                  |        |          |        |
| African American    | 86       | 1.9%   | 622      | 2.3%  | 117                | 4.3%   | 937      | 8.6%  | 398              | 99.5%  | 91       | 100.0% |
| Asian               | 165      | 3.6%   | 1941     | 7.0%  | 123                | 4.5%   | 997      | 9.1%  | 0                | 0.0%   | 0        | 0.0%   |
| non-Hispanic white  | 4183     | 90.2%  | 22857    | 82.8% | 2222               | 81.0%  | 8009     | 73.5% | 1                | 0.2%   | 0        | 0.0%   |
| Latino              | 206      | 4.4%   | 2181     | 7.9%  | 281                | 10.2%  | 960      | 8.8%  | 1                | 0.2%   | 0        | 0.0%   |
| Age:                |          |        |          |       |                    |        |          |       |                  |        |          |        |
| Age < 50            | 38       | 0.8%   | 4619     | 16.7% | 30                 | 1.1%   | 0        | 0.0%  | 18               | 4.5%   | 0        | 0.0%   |
| 50 ≤ Age < 60       | 520      | 11.2%  | 5050     | 18.3% | 578                | 21.1%  | 2472     | 22.7% | 126              | 31.5%  | 14       | 15.4%  |
| 60 ≤ Age < 70       | 1837     | 39.6%  | 7242     | 26.2% | 1593               | 58.1%  | 4957     | 45.5% | 174              | 43.5%  | 41       | 45.1%  |
| 70 ≤ Age            | 2245     | 48.4%  | 10690    | 38.7% | 542                | 19.8%  | 3474     | 31.9% | 82               | 20.5%  | 36       | 39.6%  |
| PSA:                |          |        |          |       |                    |        |          |       |                  |        |          |        |
| Mean (SD)           | 13.6     | (66.1) | 2.5      | (6.2) | 8.5                | (25.2) | 2.4      | (3.5) | 12.2             | (44.2) | 2.8      | (3.1)  |
| Median (MAD)        | 6.9      | (3.6)  | 1.5      | (1.3) | 5.8                | (2.6)  | 1.5      | (1.2) | 6.5              | (2.8)  | 1.7      | (1.6)  |
| Interquartile range | 5.0-10.7 |        | 0.8-2.8  |       | 4.5-8.3            |        | 0.8-2.9  |       | 5.0-10.0         |        | 0.9-3.7  |        |
| Stage:              |          |        |          |       |                    |        |          |       |                  |        |          |        |
| Localized           | 3444     | 74.2%  | —        | —     | 1849               | 67.4%  | —        | —     | 334              | 83.5%  | —        | —      |
| Regional            | 370      | 8.0%   | —        | —     | 245                | 8.9%   | —        | —     | 41               | 10.2%  | —        | —      |
| Distant             | 82       | 2.0%   | —        | —     | 16                 | 0.7%   | —        | —     | 5                | 1.3%   | —        | —      |
| Unknown             | 158      | 3.9%   | —        | —     | 34                 | 1.6%   | —        | —     | 16               | 4.0%   | —        | —      |
| Gleason:            |          |        |          |       |                    |        |          |       |                  |        |          |        |
| ≤5                  | 116      | 2.5%   | —        | —     | 43                 | 1.6%   | —        | —     | 8                | 2.0%   | —        | —      |
| 6                   | 1889     | 55.6%  | —        | —     | 972                | 61.1%  | —        | —     | 206              | 54.1%  | —        | —      |
| 7                   | 1062     | 31.3%  | —        | —     | 436                | 27.4%  | —        | —     | 143              | 37.5%  | —        | —      |
| 8                   | 192      | 5.7%   | —        | —     | 84                 | 5.3%   | —        | —     | 16               | 4.2%   | —        | —      |
| 9                   | 119      | 3.5%   | —        | —     | 49                 | 3.1%   | —        | —     | 6                | 1.6%   | —        | —      |
| 10                  | 18       | 0.5%   | —        | —     | 7                  | 0.4%   | —        | —     | 2                | 0.5%   | —        | —      |

**Table S2:** Genome-wide significant SNPs found in our cohort. Meta-analysis is given for the four RPGEH race/ethnicity groups for the fixed effects (FE) and random effects (RE) analysis. Information is given for each SNP's rs number, chromosomal location, chromosomal position, correlation with other previously reported SNPs in the vicinity (using KP non-Hispanic white race/ethnicity individuals), and type of region in the genome the SNP is located in. RAF, risk allele frequency.

| Round / Condition | SNP                                                                                  | Risk Allele       | Ref. Allele | Group          | RAF   | OR (95% CI)       | P       | $r_{\text{info}}^2$ |
|-------------------|--------------------------------------------------------------------------------------|-------------------|-------------|----------------|-------|-------------------|---------|---------------------|
| 0                 | rs3731827<br>2p11.2<br>85806068<br>$r_{\text{rs10187424}}^2 = 0.99$<br>DHS           | T                 | C           | KP NH white    | 0.584 | 1.11 (1.06, 1.16) | 5.6e-06 | 1.00                |
|                   |                                                                                      |                   |             | KP Latino      | 0.630 | 1.18 (1.00, 1.39) | 0.046   | 1.00                |
|                   |                                                                                      |                   |             | KP Asian       | 0.604 | 1.39 (1.14, 1.69) | 0.0012  | 1.00                |
|                   |                                                                                      |                   |             | KP Af-Amer     | 0.413 | 1.23 (1.08, 1.41) | 0.0025  | 1.00                |
|                   |                                                                                      |                   |             | Kaiser Meta FE | —     | 1.13 (1.09, 1.18) | 9.7e-10 | —                   |
|                   |                                                                                      |                   |             | Kaiser Meta RE | —     | 1.19 (1.08, 1.30) | 0.00026 | —                   |
| 0                 | rs13016083<br>2q22.3<br>148570945<br>(no prev)<br>intergenic                         | T                 | C           | KP NH white    | 0.696 | 1.14 (1.08, 1.19) | 1.6e-07 | 0.99                |
|                   |                                                                                      |                   |             | KP Latino      | 0.722 | 1.11 (0.93, 1.31) | 0.26    | 0.98                |
|                   |                                                                                      |                   |             | KP Asian       | 0.645 | 1.13 (0.92, 1.38) | 0.24    | 1.00                |
|                   |                                                                                      |                   |             | KP Af-Amer     | 0.880 | 1.18 (0.95, 1.47) | 0.15    | 0.97                |
|                   |                                                                                      |                   |             | Kaiser Meta FE | —     | 1.13 (1.09, 1.19) | 1.6e-08 | —                   |
|                   |                                                                                      |                   |             | Kaiser Meta RE | —     | 1.13 (1.09, 1.19) | 1.6e-08 | —                   |
|                   |                                                                                      |                   |             | MEC            | 0.694 | 0.99 (0.87, 1.13) | 0.79    | 0.81                |
| PEGASUS           | 0.693                                                                                | 1.03 (0.96, 1.11) | 0.39        | 1.00           |       |                   |         |                     |
| 0                 | rs4646284<br>(See text)                                                              |                   |             |                |       |                   |         |                     |
| 0                 | rs7808935<br>7p15.2<br>27977363<br>$r_{\text{rs10486567}}^2 = 0.99$<br>intron        | T                 | C           | KP NH white    | 0.766 | 1.17 (1.11, 1.23) | 2.4e-09 | 1.00                |
|                   |                                                                                      |                   |             | KP Latino      | 0.606 | 1.21 (1.03, 1.41) | 0.019   | 1.00                |
|                   |                                                                                      |                   |             | KP Asian       | 0.155 | 1.00 (0.77, 1.29) | 1       | 1.00                |
|                   |                                                                                      |                   |             | KP Af-Amer     | 0.700 | 1.18 (1.02, 1.37) | 0.03    | 1.00                |
|                   |                                                                                      |                   |             | Kaiser Meta FE | —     | 1.17 (1.12, 1.22) | 2.7e-11 | —                   |
|                   |                                                                                      |                   |             | Kaiser Meta RE | —     | 1.17 (1.12, 1.22) | 2.7e-11 | —                   |
| 0                 | rs142463603<br>8p21.2<br>23507262<br>$r_{\text{rs142463603}}^2 = 0.89$<br>intergenic | A                 | C           | KP NH white    | 0.417 | 1.17 (1.12, 1.22) | 7.4e-13 | 0.99                |
|                   |                                                                                      |                   |             | KP Latino      | 0.435 | 1.19 (1.01, 1.39) | 0.035   | 0.99                |
|                   |                                                                                      |                   |             | KP Asian       | 0.312 | 1.22 (1.00, 1.49) | 0.048   | 0.99                |
|                   |                                                                                      |                   |             | KP Af-Amer     | 0.542 | 1.19 (1.04, 1.37) | 0.011   | 0.98                |
|                   |                                                                                      |                   |             | Kaiser Meta FE | —     | 1.18 (1.13, 1.22) | 4.1e-16 | —                   |
|                   |                                                                                      |                   |             | Kaiser Meta RE | —     | 1.18 (1.13, 1.22) | 4.1e-16 | —                   |
| 0                 | rs11986220<br>8q24.21<br>128531689<br>(exact)<br>DHS                                 | A                 | T           | KP NH white    | 0.099 | 1.56 (1.46, 1.67) | 2.3e-40 | 1.00                |
|                   |                                                                                      |                   |             | KP Latino      | 0.083 | 1.09 (0.83, 1.43) | 0.52    | 0.99                |
|                   |                                                                                      |                   |             | KP Asian       | 0.136 | 1.83 (1.44, 2.33) | 9.2e-07 | 0.99                |
|                   |                                                                                      |                   |             | KP Af-Amer     | 0.067 | 1.38 (1.06, 1.80) | 0.016   | 1.00                |
|                   |                                                                                      |                   |             | Kaiser Meta FE | —     | 1.54 (1.45, 1.63) | 4.1e-45 | —                   |
|                   |                                                                                      |                   |             | Kaiser Meta RE | —     | 1.47 (1.24, 1.74) | 1e-05   | —                   |
| 0                 | 9:33975799<br>9p13.3<br>33975799<br>(no prev)<br>intron                              | CA                | C           | KP NH white    | 0.801 | 0.86 (0.82, 0.91) | 1.1e-07 | 0.95                |
|                   |                                                                                      |                   |             | KP Latino      | 0.874 | 0.83 (0.66, 1.04) | 0.1     | 0.95                |
|                   |                                                                                      |                   |             | KP Asian       | 0.968 | 0.59 (0.34, 1.03) | 0.062   | 0.67                |
|                   |                                                                                      |                   |             | KP Af-Amer     | 0.906 | 0.98 (0.76, 1.26) | 0.87    | 0.89                |
|                   |                                                                                      |                   |             | Kaiser Meta FE | —     | 0.86 (0.82, 0.91) | 2e-08   | —                   |
|                   |                                                                                      |                   |             | Kaiser Meta RE | —     | 0.86 (0.82, 0.91) | 2e-08   | —                   |
|                   |                                                                                      |                   |             | MEC            | 0.906 | 1.05 (0.90, 1.22) | 0.54    | 0.90                |
|                   |                                                                                      |                   |             | PEGASUS        | 0.791 | 0.94 (0.90, 0.98) | 0.13    | 0.99                |
| 0                 | rs10993994<br>10q11.23<br>51549496<br>(exact)<br>DHS                                 | T                 | C           | KP NH white    | 0.401 | 1.21 (1.16, 1.26) | 2.9e-18 | 1.00                |
|                   |                                                                                      |                   |             | KP Latino      | 0.388 | 1.31 (1.12, 1.53) | 0.00064 | 1.00                |
|                   |                                                                                      |                   |             | KP Asian       | 0.498 | 1.18 (0.97, 1.43) | 0.092   | 1.00                |
|                   |                                                                                      |                   |             | KP Af-Amer     | 0.600 | 1.08 (0.94, 1.24) | 0.29    | 1.00                |
|                   |                                                                                      |                   |             | Kaiser Meta FE | —     | 1.21 (1.16, 1.25) | 6.5e-21 | —                   |
|                   |                                                                                      |                   |             | Kaiser Meta RE | —     | 1.20 (1.13, 1.27) | 6.8e-10 | —                   |

| Round /<br>Condition | SNP                                                                                  | Risk<br>Allele | Ref.<br>Allele | Group          | RAF   | OR (95% CI)       | P       | $r^2_{\text{info}}$ |
|----------------------|--------------------------------------------------------------------------------------|----------------|----------------|----------------|-------|-------------------|---------|---------------------|
| 0                    | rs376592364<br>11q13.3<br>69011693<br>$r^2_{\text{rs10875943}} = 0.99$<br>intergenic | A              | T              | KP NH white    | 0.480 | 0.82 (0.79, 0.86) | 6.5e-19 | 0.98                |
|                      |                                                                                      |                |                | KP Latino      | 0.607 | 0.84 (0.72, 0.98) | 0.029   | 0.98                |
|                      |                                                                                      |                |                | KP Asian       | 0.901 | 0.88 (0.65, 1.20) | 0.41    | 0.98                |
|                      |                                                                                      |                |                | KP Af-Amer     | 0.446 | 0.91 (0.80, 1.05) | 0.2     | 0.97                |
|                      |                                                                                      |                |                | Kaiser Meta FE | —     | 0.83 (0.80, 0.86) | 5.9e-20 | —                   |
|                      |                                                                                      |                |                | Kaiser Meta RE | —     | 0.83 (0.80, 0.86) | 5.9e-20 | —                   |
| 0                    | 12:49672714<br>12q13.12<br>49672714<br>$r^2_{\text{rs10875943}} = 0.84$<br>DHS       | A              | G              | KP NH white    | 0.746 | 0.90 (0.85, 0.94) | 9.1e-06 | 1.00                |
|                      |                                                                                      |                |                | KP Latino      | 0.702 | 0.96 (0.81, 1.14) | 0.64    | 1.00                |
|                      |                                                                                      |                |                | KP Asian       | 0.319 | 0.68 (0.55, 0.85) | 0.0005  | 1.00                |
|                      |                                                                                      |                |                | KP Af-Amer     | 0.472 | 0.81 (0.71, 0.92) | 0.0018  | 1.00                |
|                      |                                                                                      |                |                | Kaiser Meta FE | —     | 0.88 (0.84, 0.92) | 8e-09   | —                   |
|                      |                                                                                      |                |                | Kaiser Meta RE | —     | 0.85 (0.76, 0.95) | 0.003   | —                   |
| 0                    | 12:53309584<br>12q13.13<br>53309584<br>$r^2_{\text{rs902774}} = 0.77$<br>DHS         | G              | A              | KP NH white    | 0.878 | 0.81 (0.76, 0.87) | 1e-10   | 1.00                |
|                      |                                                                                      |                |                | KP Latino      | 0.916 | 0.81 (0.63, 1.05) | 0.12    | 1.00                |
|                      |                                                                                      |                |                | KP Asian       | 0.992 | —                 | —       | 1.00                |
|                      |                                                                                      |                |                | KP Af-Amer     | 0.846 | 0.69 (0.57, 0.82) | 2.7e-05 | 1.00                |
|                      |                                                                                      |                |                | Kaiser Meta FE | —     | 0.80 (0.75, 0.85) | 2e-14   | —                   |
|                      |                                                                                      |                |                | Kaiser Meta RE | —     | 0.78 (0.70, 0.87) | 4.9e-06 | —                   |
| 0                    | rs34582366<br>14q23.1<br>61933357<br>$r^2_{\text{rs7153648}} = 2.1e-06$<br>DHS       | G              | T              | KP NH white    | 0.959 | 1.42 (1.26, 1.59) | 1.3e-08 | 0.98                |
|                      |                                                                                      |                |                | KP Latino      | 0.963 | 1.32 (0.83, 2.08) | 0.24    | 0.96                |
|                      |                                                                                      |                |                | KP Asian       | 0.921 | 1.11 (0.77, 1.60) | 0.58    | 0.98                |
|                      |                                                                                      |                |                | KP Af-Amer     | 0.880 | 1.13 (0.91, 1.41) | 0.27    | 0.92                |
|                      |                                                                                      |                |                | Kaiser Meta FE | —     | 1.32 (1.20, 1.46) | 2.3e-08 | —                   |
|                      |                                                                                      |                |                | Kaiser Meta RE | —     | 1.28 (1.12, 1.47) | 0.00035 | —                   |
|                      |                                                                                      |                |                | MEC            | 0.865 | 0.96 (0.85, 1.09) | 0.56    | 0.96                |
|                      |                                                                                      |                |                | PEGASUS        | 0.957 | 0.90 (0.76, 1.06) | 0.19    | —                   |
| 0                    | rs11263763<br>17q12<br>36103565<br>$r^2_{\text{rs7501939}} = 0.71$<br>DHS            | G              | A              | KP NH white    | 0.481 | 0.81 (0.78, 0.85) | 1.8e-21 | 0.97                |
|                      |                                                                                      |                |                | KP Latino      | 0.434 | 0.84 (0.72, 0.99) | 0.034   | 0.99                |
|                      |                                                                                      |                |                | KP Asian       | 0.293 | 0.80 (0.65, 1.00) | 0.047   | 0.95                |
|                      |                                                                                      |                |                | KP Af-Amer     | 0.399 | 0.87 (0.75, 1.00) | 0.047   | 0.96                |
|                      |                                                                                      |                |                | Kaiser Meta FE | —     | 0.82 (0.78, 0.85) | 5.3e-24 | —                   |
|                      |                                                                                      |                |                | Kaiser Meta RE | —     | 0.82 (0.78, 0.85) | 5.3e-24 | —                   |
| 0                    | rs8071558<br>17q24.3<br>69107673<br>$r^2_{\text{rs1859962}} = 0.99$<br>DHS           | C              | G              | KP NH white    | 0.483 | 1.14 (1.09, 1.18) | 6.8e-09 | 1.00                |
|                      |                                                                                      |                |                | KP Latino      | 0.543 | 1.19 (1.02, 1.38) | 0.03    | 1.00                |
|                      |                                                                                      |                |                | KP Asian       | 0.400 | 1.03 (0.85, 1.25) | 0.75    | 1.00                |
|                      |                                                                                      |                |                | KP Af-Amer     | 0.199 | 1.21 (1.04, 1.40) | 0.013   | 1.00                |
|                      |                                                                                      |                |                | Kaiser Meta FE | —     | 1.14 (1.09, 1.18) | 7.2e-11 | —                   |
|                      |                                                                                      |                |                | Kaiser Meta RE | —     | 1.14 (1.09, 1.18) | 7.2e-11 | —                   |
| 0                    | rs2659124<br>(See text)                                                              |                |                |                |       |                   |         |                     |
| 0                    | rs5759167<br>22q13.2<br>43500212<br>(exact)<br>DHS                                   | G              | T              | KP NH white    | 0.505 | 1.14 (1.09, 1.19) | 5.2e-09 | 0.93                |
|                      |                                                                                      |                |                | KP Latino      | 0.575 | 1.00 (0.85, 1.17) | 0.99    | 1.00                |
|                      |                                                                                      |                |                | KP Asian       | 0.681 | 1.15 (0.94, 1.41) | 0.19    | 0.98                |
|                      |                                                                                      |                |                | KP Af-Amer     | 0.731 | 1.14 (0.98, 1.33) | 0.091   | 1.00                |
|                      |                                                                                      |                |                | Kaiser Meta FE | —     | 1.13 (1.09, 1.18) | 1.8e-09 | —                   |
|                      |                                                                                      |                |                | Kaiser Meta RE | —     | 1.13 (1.09, 1.18) | 1.8e-09 | —                   |
| 1                    | rs7679673<br>4q24<br>106061534<br>(exact)<br>intergenic                              | C              | A              | KP NH white    | 0.590 | 1.12 (1.07, 1.17) | 4.4e-07 | 1.00                |
|                      |                                                                                      |                |                | KP Latino      | 0.498 | 1.16 (0.99, 1.36) | 0.061   | 0.99                |
|                      |                                                                                      |                |                | KP Asian       | 0.233 | 1.12 (0.90, 1.40) | 0.32    | 0.99                |
|                      |                                                                                      |                |                | KP Af-Amer     | 0.399 | 1.09 (0.94, 1.25) | 0.24    | 0.99                |
|                      |                                                                                      |                |                | Kaiser Meta FE | —     | 1.12 (1.08, 1.17) | 2.6e-08 | —                   |
|                      |                                                                                      |                |                | Kaiser Meta RE | —     | 1.12 (1.08, 1.17) | 2.6e-08 | —                   |
| 1                    | rs12682374<br>8q24.21<br>128410948<br>$r^2_{\text{rs12682374}} = 0.95$<br>intergenic | C              | G              | KP NH white    | 0.506 | 1.26 (1.20, 1.31) | 3.2e-24 | 1.00                |
|                      |                                                                                      |                |                | KP Latino      | 0.566 | 1.33 (1.13, 1.56) | 0.00054 | 1.00                |
|                      |                                                                                      |                |                | KP Asian       | 0.408 | 1.02 (0.84, 1.24) | 0.83    | 1.00                |
|                      |                                                                                      |                |                | KP Af-Amer     | 0.834 | 1.22 (1.00, 1.48) | 0.047   | 0.98                |
|                      |                                                                                      |                |                | Kaiser Meta FE | —     | 1.25 (1.20, 1.30) | 8.9e-27 | —                   |
|                      |                                                                                      |                |                | Kaiser Meta RE | —     | 1.23 (1.13, 1.33) | 1.8e-06 | —                   |

| Round /<br>Condition | SNP                                                                                                                                                  | Risk<br>Allele | Ref.<br>Allele | Group            | RAF   | OR (95% CI)       | P       | $r_{\text{info}}^2$ |
|----------------------|------------------------------------------------------------------------------------------------------------------------------------------------------|----------------|----------------|------------------|-------|-------------------|---------|---------------------|
| 1                    | rs71046513<br>11q13.3<br>69009755<br>$r_{\text{rs12793759}}^2 = 0.92$<br>DHS                                                                         | ATT            | A              | KP NH white      | 0.817 | 0.86 (0.81, 0.91) | 1.3e-07 | 0.92                |
|                      |                                                                                                                                                      |                |                | KP Latino        | 0.864 | 0.88 (0.70, 1.11) | 0.29    | 0.95                |
|                      |                                                                                                                                                      |                |                | KP Asian         | 0.969 | 1.07 (0.53, 2.13) | 0.85    | 0.74                |
|                      |                                                                                                                                                      |                |                | KP Af-Amer       | 0.789 | 0.84 (0.71, 1.00) | 0.048   | 0.94                |
|                      |                                                                                                                                                      |                |                | Kaiser Meta FE   | —     | 0.86 (0.82, 0.91) | 1.2e-08 | —                   |
|                      |                                                                                                                                                      |                |                | Kaiser Meta RE   | —     | 0.86 (0.82, 0.91) | 1.2e-08 | —                   |
| 2                    | rs630045<br>6q22.1<br>117199790<br>$r_{\text{rs339331}}^2 = 1.00$<br>intron                                                                          | C              | G              | KP NH white      | 0.706 | 1.14 (1.09, 1.20) | 7.1e-08 | 1.00                |
|                      |                                                                                                                                                      |                |                | KP Latino        | 0.722 | 1.01 (0.85, 1.21) | 0.88    | 1.00                |
|                      |                                                                                                                                                      |                |                | KP Asian         | 0.647 | 1.23 (1.00, 1.51) | 0.053   | 0.99                |
|                      |                                                                                                                                                      |                |                | KP Af-Amer       | 0.762 | 1.07 (0.91, 1.26) | 0.42    | 1.00                |
|                      |                                                                                                                                                      |                |                | Kaiser Meta FE   | —     | 1.13 (1.08, 1.18) | 3e-08   | —                   |
|                      |                                                                                                                                                      |                |                | Kaiser Meta RE   | —     | 1.13 (1.08, 1.18) | 3e-08   | —                   |
| 2                    | rs77541621<br>8q24.21<br>128077146<br>$r_{\text{rs6983561}}^2 = 0.47$<br>intergenic                                                                  | G              | A              | KP NH white      | 0.978 | 0.49 (0.43, 0.56) | 2.1e-26 | 0.90                |
|                      |                                                                                                                                                      |                |                | KP Latino        | 0.987 | 0.75 (0.39, 1.46) | 0.4     | 0.90                |
|                      |                                                                                                                                                      |                |                | KP Asian         | 0.998 | —                 | —       | 0.85                |
|                      |                                                                                                                                                      |                |                | KP Af-Amer       | 0.995 | -                 | -       | 0.84                |
|                      |                                                                                                                                                      |                |                | Kaiser Meta FE   | —     | 0.50 (0.44, 0.57) | 3.1e-26 | —                   |
|                      |                                                                                                                                                      |                |                | Kaiser Meta RE   | —     | 0.53 (0.38, 0.75) | 0.00024 | —                   |
|                      |                                                                                                                                                      |                |                | MEC              | 0.996 | —                 | —       | 0.84                |
|                      |                                                                                                                                                      |                |                | PEGASUS          | 0.972 | 0.51 (0.41, 0.63) | 8.6e-10 | 0.84                |
| 8q24 loci            | rs77541621                                                                                                                                           | G              | A              | KP NH white      | 0.978 | 0.61 (0.50, 0.74) | 1.2e-06 | 0.90                |
|                      |                                                                                                                                                      |                |                | KP Latino        | 0.987 | 1.00 (0.47, 2.15) | 0.99    | 0.90                |
|                      |                                                                                                                                                      |                |                | KP Asian         | 0.998 | —                 | —       | 0.85                |
|                      |                                                                                                                                                      |                |                | KP Af-Amer       | 0.995 | —                 | —       | 0.84                |
|                      |                                                                                                                                                      |                |                | MEC              | 0.996 | —                 | —       | 0.84                |
|                      |                                                                                                                                                      |                |                | PEGASUS          | 0.972 | 0.68 (0.49, 0.94) | 0.020   | 0.84                |
| 3                    | rs72725879<br>8q24.21<br>128103969<br>$r_{\text{rs72725879}}^2 = 0.73$<br>DHS                                                                        | C              | T              | KP NH white      | 0.811 | 0.85 (0.80, 0.90) | 7.4e-09 | 0.98                |
|                      |                                                                                                                                                      |                |                | KP Latino        | 0.756 | 0.83 (0.69, 0.98) | 0.032   | 0.99                |
|                      |                                                                                                                                                      |                |                | KP Asian         | 0.333 | 0.52 (0.41, 0.65) | 2.6e-08 | 0.99                |
|                      |                                                                                                                                                      |                |                | KP Af-Amer       | 0.648 | 0.68 (0.59, 0.79) | 2e-07   | 0.97                |
|                      |                                                                                                                                                      |                |                | Kaiser Meta FE   | —     | 0.81 (0.77, 0.85) | 1e-17   | —                   |
|                      |                                                                                                                                                      |                |                | Kaiser Meta RE   | —     | 0.72 (0.59, 0.87) | 0.00067 | —                   |
| 3                    | 12:25430787<br>12p12.1<br>25430787<br>intergenic                                                                                                     | C              | T              | KP NH white      | 0.966 | 0.72 (0.64, 0.81) | 2.3e-08 | 0.96                |
|                      |                                                                                                                                                      |                |                | KP Latino        | 0.974 | 0.86 (0.53, 1.39) | 0.53    | 0.97                |
|                      |                                                                                                                                                      |                |                | KP Asian         | 0.998 | -                 | -       | 0.61                |
|                      |                                                                                                                                                      |                |                | KP Af-Amer       | 0.990 | -                 | -       | 0.80                |
|                      |                                                                                                                                                      |                |                | Kaiser Meta FE   | —     | 0.74 (0.66, 0.82) | 4.8e-08 | —                   |
|                      |                                                                                                                                                      |                |                | Kaiser Meta RE   | —     | 0.74 (0.65, 0.86) | 4.7e-05 | —                   |
|                      |                                                                                                                                                      |                |                | MEC              | 0.991 | —                 | —       | 0.81                |
|                      |                                                                                                                                                      |                |                | PEGASUS          | 0.957 | 1.10 (0.92, 1.33) | 0.27    | 0.76                |
| 4                    | rs4527381<br>3p11.2<br>87221370<br>$r_{\text{rs17181170}}^2 = 0.79,$<br>$r_{\text{rs7629490}}^2 = 0.38,$<br>$r_{\text{rs17023900}}^2 = 0.064$<br>DHS | C              | T              | KP NH white      | 0.505 | 1.12 (1.07, 1.17) | 6.9e-07 | 0.99                |
|                      |                                                                                                                                                      |                |                | KP Latino        | 0.595 | 1.13 (0.96, 1.32) | 0.14    | 0.99                |
|                      |                                                                                                                                                      |                |                | KP Asian         | 0.678 | 1.10 (0.89, 1.36) | 0.37    | 0.99                |
|                      |                                                                                                                                                      |                |                | KP Af-Amer       | 0.756 | 1.15 (0.97, 1.36) | 0.1     | 0.98                |
|                      |                                                                                                                                                      |                |                | Kaiser Meta FE   | —     | 1.12 (1.08, 1.17) | 4.1e-08 | —                   |
|                      |                                                                                                                                                      |                |                | Kaiser Meta RE   | —     | 1.12 (1.08, 1.17) | 4.1e-08 | —                   |
|                      |                                                                                                                                                      |                |                | MEC              | —     | —                 | —       | —                   |
| 4                    | rs73351629<br>8q24.21<br>128018466<br>$r_{\text{rs73351629}}^2 = 0.84$<br>intergenic                                                                 | C              | G              | KP NH white      | 0.670 | 1.16 (1.11, 1.22) | 5.6e-10 | 0.99                |
|                      |                                                                                                                                                      |                |                | KP Latino        | 0.657 | 1.17 (0.99, 1.38) | 0.069   | 0.99                |
|                      |                                                                                                                                                      |                |                | KP Asian         | 0.807 | 1.06 (0.82, 1.36) | 0.67    | 0.98                |
|                      |                                                                                                                                                      |                |                | KP Af-Amer       | 0.748 | 1.30 (1.10, 1.54) | 0.0018  | 0.98                |
|                      |                                                                                                                                                      |                |                | Kaiser Meta FE   | —     | 1.17 (1.12, 1.22) | 2e-12   | —                   |
|                      |                                                                                                                                                      |                |                | Kaiser Meta RE   | —     | 1.17 (1.12, 1.22) | 2e-12   | —                   |
| 4                    | rs36004513<br>2p22.3<br>34429966<br>(no prev)<br>intergenic                                                                                          | G              | GA             | KP NH white      | 0.998 | -                 | -       | 0.54                |
|                      |                                                                                                                                                      |                |                | KP Latino        | 0.989 | 0.36 (0.19, 0.66) | 0.0011  | 0.76                |
|                      |                                                                                                                                                      |                |                | KP Asian         | 0.992 | -                 | -       | 0.87                |
|                      |                                                                                                                                                      |                |                | KP Af-Amer       | 0.874 | 0.61 (0.49, 0.75) | 2.2e-06 | 0.97                |
|                      |                                                                                                                                                      |                |                | Kaiser Meta FE   | —     | 0.58 (0.47, 0.70) | 3.1e-08 | —                   |
|                      |                                                                                                                                                      |                |                | Kaiser Meta RE   | —     | 0.50 (0.31, 0.83) | 0.0073  | —                   |
|                      |                                                                                                                                                      |                |                | MEC <sup>†</sup> | 0.868 | 0.98 (0.87, 1.11) | 0.80    | 0.99                |
|                      |                                                                                                                                                      |                |                | PEGASUS          | —     | —                 | —       | —                   |

**Table S3:** Cis-eQTL expression of the rs4646284 locus. Het, heterogeneity p-value.

| Gene      | Transcription |           | Normal prostate tissue                     |         |                                               |        | Tumor prostate tissue                        |        |                                                 |       | Fixed Effects Meta-analysis of non-Mayo |             |       |
|-----------|---------------|-----------|--------------------------------------------|---------|-----------------------------------------------|--------|----------------------------------------------|--------|-------------------------------------------------|-------|-----------------------------------------|-------------|-------|
|           |               |           | Mayo <sup>1</sup> (n=471, frozen, RNA-seq) |         | PHS+HPFS <sup>2</sup> (n=56, paraffin, array) |        | TCGA <sup>3</sup> (n=128, paraffin, RNA-seq) |        | PHS+HPFS <sup>4</sup> (n=99, paraffin, RNA-seq) |       | Est (95% CI)                            | One-sided P | Het P |
|           | Start         | End       | Est (95% CI)                               | P       | Est (95% CI)                                  | P      | Est (95% CI)                                 | P      | Est (95% CI)                                    |       |                                         |             |       |
| IGF2R     | 160390130     | 160527583 | -0.023 (-0.043, -0.003)                    | 0.024   | -0.032 (-0.130, 0.067)                        | 0.53   | 0.344 (0.017, 0.671)                         | 0.041  | -0.052 (-0.151, 0.047)                          | 0.3   | -0.025 (-0.093, 0.043)                  | 0.24        | 0.074 |
| LOC729603 | 160514113     | 160517244 | -0.044 (-0.079, -0.008)                    | 0.018   | -0.132 (-0.229, -0.036)                       | 0.0072 | 0.084 (-0.248, 0.416)                        | 0.62   | -0.014 (-0.107, 0.080)                          | 0.77  | -0.065 (-0.131, 0.001)                  | 0.027       | 0.15  |
| SLC22A1   | 160542862     | 160579750 | -0.421 (-0.499, -0.343)                    | 1.3e-23 | 0.007 (-0.110, 0.125)                         | 0.9    | -0.292 (-0.620, 0.036)                       | 0.084  | -0.097 (-0.198, 0.005)                          | 0.063 | -0.065 (-0.140, 0.010)                  | 0.046       | 0.16  |
| SLC22A2   | 160637793     | 160679963 | -0.255 (-0.356, -0.154)                    | 1.1e-06 | 0.002 (-0.106, 0.110)                         | 0.97   | -0.192 (-0.522, 0.138)                       | 0.26   | -0.020 (-0.106, 0.065)                          | 0.64  | -0.019 (-0.084, 0.047)                  | 0.29        | 0.55  |
| SLC22A3   | 160769404     | 160873611 | -0.684 (-0.761, -0.607)                    | 3.2e-52 | -0.346 (-0.755, 0.062)                        | 0.096  | -0.256 (-0.585, 0.073)                       | 0.13   | -0.383 (-0.738, -0.029)                         | 0.034 | -0.323 (-0.531, -0.115)                 | 0.0012      | 0.87  |
| LPAL2     | 160888217     | 160932156 | -0.060 (-0.102, -0.017)                    | 0.006   | -0.216 (-0.375, -0.057)                       | 0.0079 | -0.454 (-0.776, -0.132)                      | 0.0066 | -0.080 (-0.205, 0.044)                          | 0.21  | -0.159 (-0.253, -0.065)                 | 0.00045     | 0.073 |
| LPA       | 160952514     | 161087407 | 0.017 (-0.068, 0.102)                      | 0.69    | -0.082 (-0.230, 0.066)                        | 0.28   | 0.206 (-0.123, 0.535)                        | 0.22   | 0.016 (-0.092, 0.125)                           | 0.77  | -0.003 (-0.088, 0.081)                  | 1.00        | 0.25  |

<sup>1</sup>Normal prostate tissue (fresh frozen) of 471 men with Gleason  $\leq 7$  undergoing radical prostatectomy or cystoprostatectomy from the Mayo Clinic, via RNA-seq.

<sup>2</sup>Normal prostate tissue (formalin-fixed paraffin embedded) of 56 prostate cancer cases from the Physicians Health Study (PHS) and the Health Professionals Follow-up Study (HPFS), via the Affymetrix GeneChip Human Gene 1.0 ST microarray.

<sup>3</sup>Prostate tumor tissue (formalin-fixed paraffin embedded) of 128 men from the The Cancer Genome Atlas (TCGA), via RNA-seq.

<sup>4</sup>Prostate tumor tissue (formalin-fixed paraffin embedded) of 99 men from the PHS and HPFS from trans-urethral resection of the prostate (TURP) or radical prostatectomy specimens, via the Affymetrix GeneChip Human Gene 1.0 ST microarray.

**Table S4:** Results at the 105 loci previously found to be associated with prostate cancer. These risk variants were identified in GWAS of European ancestry, unless otherwise noted, as follows: <sup>a</sup>identified in a multi-ethnic sample, though mainly of European ancestry; <sup>b</sup>identified in an Asian ancestry sample; <sup>c</sup>identified in an African ancestry sample.

| SNP                     | Region | Pos       | Risk Allele | Ref. Allele | Previous OR (95% CI) | KP non-Hispanic white |                   |         | KP Latino      |      |                   | KP Asian |                |       | KP African American |        |                | KP Meta FE |                   | KP Meta RE |                | Meta FE power     | Type    |                   |         |                   |            |      |        |
|-------------------------|--------|-----------|-------------|-------------|----------------------|-----------------------|-------------------|---------|----------------|------|-------------------|----------|----------------|-------|---------------------|--------|----------------|------------|-------------------|------------|----------------|-------------------|---------|-------------------|---------|-------------------|------------|------|--------|
|                         |        |           |             |             |                      | RAF                   | OR (95% CI)       | P       | r <sup>2</sup> | RAF  | OR (95% CI)       | P        | r <sup>2</sup> | RAF   | OR (95% CI)         | P      | r <sup>2</sup> | RAF        | OR (95% CI)       | P          | r <sup>2</sup> |                   |         | OR (95% CI)       | P       |                   |            |      |        |
| rs636291                | 1p35   | 10556007  | A           | C           | 1.18 (1.12, 1.24)    | 0.69                  | 1.05 (1.00, 1.10) | 0.036   | 0.98           | 0.59 | 0.99 (0.85, 1.16) | 0.89     | 0.99           | 0.72  | 0.96 (0.78, 1.18)   | 0.71   | 1.00           | 0.31       | 0.98 (0.85, 1.14) | 0.83       | 0.97           | 1.04 (0.99, 1.08) | 0.888   | 1.04 (0.99, 1.08) | 0.888   | 1.04 (0.99, 1.08) | 0.888      | 1/ 1 | intron |
| rs17596929              | 1q21   | 150658287 | G           | A           | 1.08 (1.06, 1.11)    | 0.21                  | 1.14 (1.08, 1.20) | 1e-06   | 0.97           | 0.22 | 0.85 (0.70, 1.04) | 0.11     | 0.97           | 0.086 | 0.89 (0.64, 1.25)   | 0.51   | 0.98           | 0.089      | 1.22 (0.97, 1.54) | 0.091      | 0.96           | 1.12 (1.06, 1.17) | 9e-06   | 1.04 (0.88, 1.22) | 0.68    | 0.98 / 0.71       | DHS        |      |        |
| rs1218582               | 1q21   | 154834183 | G           | A           | 1.06 (1.03, 1.09)    | 0.46                  | 1.08 (1.03, 1.12) | 0.001   | 0.95           | 0.59 | 0.90 (0.77, 1.05) | 0.17     | 0.99           | 0.89  | 0.87 (0.64, 1.17)   | 0.35   | 0.94           | 0.65       | 0.91 (0.79, 1.05) | 0.2        | 0.98           | 1.05 (1.00, 1.09) | 0.031   | 0.96 (0.85, 1.09) | 0.53    | 0.97 / 0.62       | utr        |      |        |
| rs4245739               | 1q32   | 204518842 | A           | C           | 1.10 (1.06, 1.14)    | 0.73                  | 1.08 (1.03, 1.13) | 0.0017  | 1.00           | 0.74 | 1.28 (1.07, 1.54) | 0.0079   | 1.00           | 0.95  | 1.45 (0.89, 2.36)   | 0.13   | 1.00           | 0.75       | 0.98 (0.84, 1.15) | 0.83       | 1.00           | 1.09 (1.04, 1.14) | 0.0003  | 1.11 (0.99, 1.24) | 0.066   | 1 / 0.98          | intergenic |      |        |
| rs1775148               | 1q32   | 205757824 | C           | T           | 1.06 (1.04, 1.08)    | 0.36                  | 1.02 (0.97, 1.07) | 0.4     | 0.99           | 0.48 | 0.95 (0.82, 1.11) | 0.55     | 0.99           | 0.44  | 1.19 (0.98, 1.44)   | 0.077  | 0.98           | 0.6        | 1.17 (1.02, 1.35) | 0.029      | 0.98           | 1.03 (0.99, 1.08) | 0.11    | 1.06 (0.97, 1.16) | 0.19    | 0.97 / 0.61       | intron     |      |        |
| rs11902236              | 2p25   | 10117868  | A           | G           | 1.07 (1.03, 1.10)    | 0.29                  | 1.01 (0.96, 1.05) | 0.8     | 1.00           | 0.25 | 1.06 (0.89, 1.26) | 0.51     | 1.00           | 0.17  | 1.01 (0.78, 1.31)   | 0.92   | 0.94           | 0.57       | 0.93 (0.81, 1.07) | 0.33       | 0.93           | 1.00 (0.96, 1.05) | 0.91    | 1.00 (0.96, 1.05) | 0.91    | 0.98 / 0.73       | intergenic |      |        |
| rs9287719               | 2p25   | 10710730  | C           | T           | 1.06 (1.04, 1.08)    | 0.49                  | 1.06 (1.01, 1.11) | 0.0092  | 1.00           | 0.47 | 0.91 (0.78, 1.06) | 0.24     | 1.00           | 0.39  | 1.02 (0.83, 1.24)   | 0.88   | 1.00           | 0.3        | 0.99 (0.85, 1.15) | 0.9        | 1.00           | 1.04 (1.00, 1.08) | 0.038   | 1.02 (0.96, 1.09) | 0.49    | 0.97 / 0.65       | intron     |      |        |
| rs13385191              | 2p24   | 20888265  | G           | A           | 1.07 (1.02, 1.12)    | 0.24                  | 1.03 (0.98, 1.09) | 0.2     | 1.00           | 0.27 | 1.00 (0.84, 1.19) | 1        | 1.00           | 0.41  | 1.14 (0.95, 1.37)   | 0.17   | 1.00           | 0.069      | 0.88 (0.67, 1.17) | 0.39       | 0.99           | 1.03 (0.99, 1.08) | 0.16    | 1.03 (0.99, 1.08) | 0.16    | 0.97 / 0.66       | DHS        |      |        |
| rs1465618 <sup>a</sup>  | 2p21   | 43559349  | A           | G           | 1.08 (1.03, 1.12)    | 0.21                  | 1.04 (0.99, 1.09) | 0.15    | 0.99           | 0.37 | 1.10 (0.94, 1.28) | 0.24     | 1.00           | 0.68  | 1.05 (0.86, 1.28)   | 0.64   | 0.99           | 0.13       | 1.16 (0.95, 1.42) | 0.14       | 1.00           | 1.05 (1.00, 1.10) | 0.037   | 1.05 (1.00, 1.10) | 0.037   | 0.99 / 0.83       | intron     |      |        |
| rs721048                | 2p15   | 63131731  | A           | G           | 1.05 (1.01, 1.12)    | 0.19                  | 1.07 (1.01, 1.13) | 0.016   | 1.00           | 0.17 | 1.09 (0.89, 1.33) | 0.41     | 1.00           | 0.052 | 1.22 (0.81, 1.83)   | 0.34   | 1.00           | 0.048      | 1.14 (0.83, 1.56) | 0.42       | 1.00           | 1.07 (1.02, 1.13) | 0.0063  | 1.07 (1.02, 1.13) | 0.0063  | 1 / 1             | intergenic |      |        |
| rs10187424 <sup>a</sup> | 2p11   | 85792497  | A           | G           | 1.09 (1.06, 1.12)    | 0.58                  | 1.11 (1.06, 1.16) | 5.4e-06 | 1.00           | 0.62 | 1.16 (0.99, 1.36) | 0.075    | 1.00           | 0.6   | 1.38 (1.13, 1.68)   | 0.0015 | 0.99           | 0.37       | 1.20 (1.05, 1.38) | 0.0082     | 1.00           | 1.13 (1.08, 1.17) | 2.7e-09 | 1.17 (1.08, 1.27) | 0.00021 | 1 / 0.99          | DHS        |      |        |
| rs12621278 <sup>a</sup> | 2q31   | 173311553 | A           | G           | 1.33 (1.24, 1.42)    | 0.94                  | 1.25 (1.13, 1.38) | 1.1e-05 | 1.00           | 0.93 | 1.23 (0.89, 1.71) | 0.21     | 1.00           | 0.75  | 0.97 (0.78, 1.21)   | 0.8    | 1.00           | 0.98       | 1.08 (0.63, 1.86) | 0.78       | 1.00           | 1.19 (1.10, 1.30) | 4.7e-05 | 1.16 (1.01, 1.33) | 0.036   | 1 / 1             | coding     |      |        |
| rs2292884               | 2q37   | 238443226 | G           | A           | 1.14 (1.09, 1.19)    | 0.24                  | 1.07 (1.01, 1.13) | 0.024   | 0.80           | 0.29 | 0.96 (0.81, 1.13) | 0.62     | 1.00           | 0.27  | 0.94 (0.75, 1.18)   | 0.61   | 0.89           | 0.55       | 0.96 (0.83, 1.10) | 0.54       | 1.00           | 1.04 (0.99, 1.09) | 0.14    | 1.02 (0.95, 1.09) | 0.56    | 1 / 1             | DHS        |      |        |
| rs3771570               | 2q37   | 242382864 | A           | G           | 1.12 (1.08, 1.17)    | 0.15                  | 1.08 (1.01, 1.14) | 0.017   | 0.99           | 0.13 | 1.16 (0.93, 1.45) | 0.2      | 1.00           | 0.13  | 0.94 (0.71, 1.26)   | 0.7    | 0.97           | 0.036      | 0.74 (0.49, 1.10) | 0.13       | 0.99           | 1.07 (1.01, 1.13) | 0.022   | 1.04 (0.92, 1.18) | 0.54    | 1 / 0.96          | intergenic |      |        |
| rs2960753               | 3p12   | 87110674  | T           | C           | 1.13 (1.06, 1.20)    | 0.12                  | 1.11 (1.04, 1.18) | 0.0024  | 1.00           | 0.17 | 1.20 (0.99, 1.45) | 0.066    | 1.00           | 0.24  | 1.15 (0.93, 1.42)   | 0.2    | 1.00           | 0.47       | 1.02 (0.89, 1.17) | 0.8        | 0.98           | 1.10 (1.04, 1.16) | 0.0005  | 1.10 (1.04, 1.16) | 0.0005  | 1 / 0.99          | intergenic |      |        |
| rs2055100 <sup>a</sup>  | 3p11   | 87467332  | C           | T           | 1.29 (1.13, 1.29)    | 0.24                  | 1.04 (0.99, 1.09) | 0.13    | 1.00           | 0.19 | 1.09 (0.83, 1.22) | 0.97     | 1.00           | 0.089 | 1.05 (0.77, 1.45)   | 0.74   | 1.00           | 0.13       | 1.06 (0.87, 1.29) | 0.58       | 1.00           | 1.04 (0.99, 1.09) | 0.11    | 1.04 (0.99, 1.09) | 0.11    | 1 / 1             | intergenic |      |        |
| rs7611694               | 3q13   | 113275624 | A           | C           | 1.10 (1.07, 1.13)    | 0.6                   | 1.08 (1.03, 1.13) | 0.0007  | 0.99           | 0.65 | 0.97 (0.83, 1.14) | 0.75     | 0.99           | 0.3   | 1.17 (0.95, 1.43)   | 0.14   | 0.96           | 0.65       | 1.00 (0.87, 1.15) | 0.99       | 0.98           | 1.07 (1.03, 1.11) | 0.001   | 1.07 (1.03, 1.11) | 0.0016  | 1 / 1             | DHS        |      |        |
| rs10934853              | 3q21   | 128038373 | A           | C           | 1.12 (1.08, 1.16)    | 0.29                  | 1.07 (1.02, 1.12) | 0.0079  | 0.96           | 0.38 | 0.94 (0.81, 1.11) | 0.47     | 1.00           | 0.47  | 1.07 (0.88, 1.30)   | 0.47   | 0.96           | 0.69       | 1.04 (0.90, 1.20) | 0.61       | 0.98           | 1.06 (1.01, 1.10) | 0.013   | 1.06 (1.01, 1.10) | 0.013   | 1 / 1             | DHS        |      |        |
| rs676931 <sup>a</sup>   | 3q23   | 114102833 | T           | C           | 1.04 (1.01, 1.07)    | 0.44                  | 1.06 (1.01, 1.10) | 0.012   | 1.00           | 0.41 | 1.02 (0.88, 1.19) | 0.78     | 1.00           | 0.32  | 0.94 (0.77, 1.15)   | 0.52   | 1.00           | 0.79       | 1.12 (0.95, 1.33) | 0.18       | 1.00           | 1.05 (1.01, 1.10) | 0.01    | 1.05 (1.01, 1.10) | 0.01    | 0.74 / 0.18       | DHS        |      |        |
| rs10096632 <sup>a</sup> | 3q26   | 170130102 | A           | C           | 1.11 (1.08, 1.14)    | 0.5                   | 1.04 (1.00, 1.09) | 0.055   | 0.96           | 0.4  | 1.14 (0.98, 1.34) | 0.098    | 0.97           | 0.33  | 0.85 (0.69, 1.04)   | 0.12   | 0.97           | 0.26       | 1.03 (0.88, 1.21) | 0.68       | 0.96           | 1.04 (1.00, 1.08) | 0.55    | 1.03 (0.95, 1.12) | 0.46    | 1 / 1             | intergenic |      |        |
| rs13009409              | 4q13   | 73855253  | T           | C           | 1.08 (1.05, 1.10)    | 0.31                  | 1.04 (0.99, 1.09) | 0.13    | 1.00           | 0.44 | 0.97 (0.83, 1.13) | 0.67     | 1.00           | 0.53  | 1.23 (1.01, 1.49)   | 0.04   | 1.00           | 0.35       | 1.06 (0.92, 1.22) | 0.43       | 1.00           | 1.04 (1.00, 1.08) | 0.058   | 1.05 (0.98, 1.11) | 0.14    | 1 / 0.91          | intergenic |      |        |
| rs1849292               | 4q13   | 7449158   | G           | A           | 1.10 (1.07, 1.13)    | 0.53                  | 1.04 (1.00, 1.09) | 0.052   | 1.00           | 0.62 | 1.00 (0.85, 1.18) | 0.97     | 0.98           | 0.61  | 1.12 (0.92, 1.36)   | 0.26   | 1.00           | 0.67       | 1.06 (0.91, 1.22) | 0.46       | 0.97           | 1.04 (1.00, 1.09) | 0.028   | 1.04 (1.00, 1.09) | 0.028   | 1 / 1             | intron     |      |        |
| rs1250420 <sup>a</sup>  | 4q22   | 9544609   | A           | C           | 1.08 (1.05, 1.12)    | 0.46                  | 1.07 (1.03, 1.12) | 0.0012  | 1.00           | 0.52 | 1.22 (1.05, 1.42) | 0.0095   | 1.00           | 0.54  | 1.02 (0.85, 1.24)   | 0.82   | 1.00           | 0.4        | 1.05 (0.91, 1.21) | 0.48       | 1.00           | 1.08 (1.04, 1.12) | 0.00013 | 1.08 (1.03, 1.13) | 0.00038 | 1 / 0.95          | intron     |      |        |
| rs17021918 <sup>a</sup> | 4q22   | 9556277   | T           | C           | 1.11 (1.07, 1.15)    | 0.65                  | 1.07 (1.02, 1.12) | 0.0025  | 1.00           | 0.71 | 1.11 (0.94, 1.32) | 0.22     | 1.00           | 0.66  | 1.01 (0.83, 1.23)   | 0.93   | 1.00           | 0.77       | 1.00 (0.85, 1.18) | 1          | 1.00           | 1.07 (1.02, 1.11) | 0.0022  | 1.07 (1.02, 1.11) | 0.0022  | 1 / 1             | DHS        |      |        |
| rs7679673 <sup>a</sup>  | 4q24   | 106061534 | C           | A           | 1.10 (1.06, 1.14)    | 0.59                  | 1.12 (1.07, 1.17) | 9.9e-07 | 1.00           | 0.5  | 1.15 (0.99, 1.35) | 0.071    | 0.99           | 0.23  | 1.08 (0.87, 1.35)   | 0.48   | 0.99           | 0.4        | 1.11 (0.96, 1.27) | 0.16       | 0.99           | 1.12 (1.07, 1.16) | 5.5e-08 | 1.12 (1.07, 1.16) | 5.5e-08 | 1 / 1             | intergenic |      |        |
| rs2242652 <sup>a</sup>  | 5p15   | 1280208   | G           | A           | 1.15 (1.11, 1.19)    | 0.81                  | 1.05 (0.97, 1.13) | 0.2     | 0.54           | 0.83 | 1.14 (0.92, 1.43) | 0.23     | 0.95           | 0.84  | 0.99 (0.71, 1.39)   | 0.96   | 0.55           | 0.85       | 1.09 (0.89, 1.35) | 0.4        | 0.85           | 1.06 (0.99, 1.13) | 0.082   | 1.06 (0.99, 1.13) | 0.082   | 1 / 0.98          | intron     |      |        |
| rs12653946              | 5p15   | 1895629   | T           | C           | 1.10 (1.06, 1.16)    | 0.44                  | 1.05 (1.00, 1.11) | 0.058   | 0.69           | 0.48 | 1.06 (0.91, 1.24) | 0.45     | 1.00           | 0.36  | 1.03 (0.81, 1.31)   | 0.81   | 0.61           | 0.4        | 1.07 (0.92, 1.25) | 0.35       | 0.85           | 1.05 (1.01, 1.10) | 0.026   | 1.05 (1.01, 1.10) | 0.026   | 1 / 0.97          | DHS        |      |        |
| rs2121875 <sup>a</sup>  | 5p12   | 44365545  | G           | T           | 1.05 (1.02, 1.08)    | 0.33                  | 0.98 (0.94, 1.03) | 0.38    | 1.00           | 0.49 | 1.16 (0.99, 1.35) | 0.059    | 1.00           | 0.49  | 1.06 (0.88, 1.28)   | 0.57   | 1.00           | 0.69       | 1.12 (0.96, 1.30) | 0.15       | 0.97           | 1.00 (0.96, 1.05) | 0.81    | 1.06 (0.96, 1.16) | 0.25    | 0.88 / 0.37       | DHS        |      |        |
| rs6869841               | 5q35   | 172939426 | A           | G           | 1.07 (1.04, 1.11)    | 0.21                  | 1.00 (0.94, 1.05) | 0.86    | 1.00           | 0.18 | 1.04 (0.85, 1.28) | 0.7      | 0.99           | 0.17  | 1.14 (0.89, 1.47)   | 0.3    | 0.96           | 0.36       | 1.08 (0.94, 1.25) | 0.25       | 0.99           | 1.01 (0.97, 1.06) | 0.61    | 1.01 (0.97, 1.06) | 0.61    | 0.96 / 0.58       | DHS        |      |        |
| rs4713266               | 6p24   | 11219030  | C           | T           | 1.06 (1.04, 1.08)    | 0.51                  | 1.02 (0.97, 1.06) | 0.47    | 0.99           | 0.42 | 0.97 (0.83, 1.13) | 0.71     | 0.99           | 0.22  | 1.04 (0.82, 1.31)   | 0.76   | 0.99           | 0.74       | 1.08 (0.92, 1.27) | 0.35       | 0.92           | 1.02 (0.98, 1.06) | 0.39    | 1.02 (0.98, 1.06) | 0.39    | 0.97 / 0.65       | DHS        |      |        |
| rs15457135              | 6p22   | 30073776  | A           | G           | 1.07 (1.05, 1.10)    | 0.2                   | 1.10 (1.04, 1.16) | 0.0006  | 0.97           | 0.23 | 1.26 (1.06, 1.50) | 0.0085   | 0.99           | 0.3   | 0.77 (0.62, 0.95)   | 0.015  | 0.99           | 0.15       | 0.87 (0.71, 1.06) | 0.17       | 0.96           | 1.08 (1.02, 1.13) | 0.0031  | 1.00 (0.83, 1.20) | 0.96    | 0.95 / 0.55       | intron     |      |        |
| rs133067 <sup>a</sup>   | 6p21   | 31118511  | G           | T           | 1.05 (1.02, 1.09)    | 0.19                  | 1.00 (0.95, 1.06) | 0.97    | 1.00           | 0.26 | 0.97 (0.82, 1.16) | 0.74     | 1.00           | 0.32  | 1.19 (0.97, 1.45)   | 0.091  | 1.00           | 0.19       | 0.82 (0.69, 0.98) | 0.033      | 1.00           | 0.99 (0.95, 1.04) | 0.82    | 0.99 (0.88, 1.10) | 0.8     | 0.75 / 0.19       | coding     |      |        |



| SNP         | Region | Pos       | Risk Allele | Ref. Allele | Previous OR (95% CI) | KP non-Hispanic white |                   |         | KP Latino      |        |                   | KP Asian |                |        | KP African American |        |                | KP Meta FE |                   | KP Meta RE |                | Meta FE power     | Type    |                   |         |              |            |
|-------------|--------|-----------|-------------|-------------|----------------------|-----------------------|-------------------|---------|----------------|--------|-------------------|----------|----------------|--------|---------------------|--------|----------------|------------|-------------------|------------|----------------|-------------------|---------|-------------------|---------|--------------|------------|
|             |        |           |             |             |                      | RAF                   | OR (95% CI)       | P       | r <sup>2</sup> | RAF    | OR (95% CI)       | P        | r <sup>2</sup> | RAF    | OR (95% CI)         | P      | r <sup>2</sup> | RAF        | OR (95% CI)       | P          | r <sup>2</sup> |                   |         | OR (95% CI)       | P       |              |            |
| rs17826*    | 9q31   | 110156300 | C           | T           | 1.41 (1.29, 1.54)    | 0.15                  | 0.97 (0.91, 1.03) | 0.27    | 0.97           | 0.13   | 0.93 (0.73, 1.17) | 0.53     | 0.96           | 0.11   | 1.08 (0.80, 1.45)   | 0.63   | 0.99           | 0.28       | 1.05 (0.90, 1.23) | 0.52       | 0.94           | 0.98 (0.93, 1.03) | 0.41    | 0.98 (0.93, 1.03) | 0.41    | 1 / 1        | intergenic |
| rs1571801   | 9q33   | 124427373 | A           | C           | 1.07 (1.02, 1.12)    | 0.25                  | 1.03 (0.98, 1.08) | 0.31    | 1.00           | 0.2    | 1.14 (0.94, 1.37) | 0.19     | 1.00           | 0.086  | 1.27 (0.93, 1.72)   | 0.13   | 1.00           | 0.15       | 0.91 (0.75, 1.10) | 0.34       | 1.00           | 1.03 (0.98, 1.08) | 0.21    | 1.04 (0.95, 1.14) | 0.4     | 0.97 / 0.62  | intron     |
| rs76934034  | 10q11  | 46082985  | T           | C           | 1.13 (1.09, 1.17)    | 0.92                  | 1.13 (1.04, 1.22) | 0.0036  | 0.99           | 0.92   | 0.95 (0.71, 1.26) | 0.7      | 0.99           | 0.99   | —                   | —      | 0.84           | 0.98       | 0.84 (0.52, 1.35) | 0.46       | 0.77           | 1.10 (1.02, 1.19) | 0.011   | 1.06 (0.92, 1.22) | 0.4     | 0.98 / 0.73  | intron     |
| rs10993994  | 10q11  | 51549496  | T           | C           | 1.23 (1.18, 1.28)    | 0.4                   | 1.21 (1.16, 1.26) | 2.9e-18 | 1.00           | 0.39   | 1.31 (1.12, 1.53) | 0.00064  | 1.00           | 0.5    | 1.18 (0.97, 1.43)   | 0.092  | 1.00           | 0.6        | 1.08 (0.94, 1.24) | 0.29       | 1.00           | 1.21 (1.16, 1.25) | 6.5e-21 | 1.20 (1.13, 1.27) | 6.8e-10 | 1 / 1        | DHS        |
| rs3850699   | 10q24  | 104414221 | A           | G           | 1.10 (1.07, 1.13)    | 0.7                   | 1.07 (1.02, 1.12) | 0.0039  | 0.99           | 0.75   | 1.14 (0.95, 1.37) | 0.15     | 0.99           | 0.81   | 0.96 (0.76, 1.22)   | 0.74   | 0.98           | 0.63       | 1.04 (0.90, 1.20) | 0.57       | 0.98           | 1.07 (1.02, 1.12) | 0.0022  | 1.07 (1.02, 1.12) | 0.0022  | 1 / 0.99     | intron     |
| rs2252004*  | 10q26  | 128447709 | C           | T           | 1.16 (1.10, 1.22)    | 0.91                  | 1.04 (0.97, 1.12) | 0.28    | 0.99           | 0.75   | 1.10 (0.92, 1.31) | 0.31     | 0.99           | 0.71   | 1.08 (0.88, 1.33)   | 0.45   | 1.00           | 0.54       | 1.10 (0.96, 1.26) | 0.17       | 0.97           | 1.06 (1.00, 1.13) | 0.844   | 1.06 (1.00, 1.13) | 0.844   | 1 / 1        | intergenic |
| rs4962146   | 10q26  | 126066872 | C           | T           | 1.09 (1.05, 1.14)    | 0.28                  | 1.02 (0.98, 1.08) | 0.33    | 0.90           | 0.24   | 1.11 (0.93, 1.33) | 0.25     | 1.00           | 0.029  | 1.07 (0.57, 2.00)   | 0.83   | 0.79           | 0.18       | 1.00 (0.84, 1.19) | 0.90       | 1.00           | 1.03 (0.98, 1.08) | 0.33    | 1.03 (0.98, 1.08) | 0.23    | 1 / 0.9      | intron     |
| rs7127900*  | 11p15  | 2233574   | A           | G           | 1.22 (1.17, 1.27)    | 0.2                   | 1.10 (1.03, 1.17) | 0.0029  | 0.70           | 0.27   | 1.07 (0.90, 1.27) | 0.43     | 1.00           | 0.12   | 0.97 (0.69, 1.38)   | 0.88   | 0.68           | 0.36       | 1.07 (0.93, 1.24) | 0.34       | 0.90           | 1.09 (1.03, 1.15) | 0.0017  | 1.09 (1.03, 1.15) | 0.0017  | 1 / 1        | intergenic |
| rs1938781*  | 11q12  | 58915110  | C           | T           | 1.16 (1.11, 1.21)    | 0.21                  | 1.05 (1.00, 1.11) | 0.052   | 1.00           | 0.23   | 1.18 (0.99, 1.40) | 0.073    | 1.00           | 0.26   | 1.00 (0.81, 1.24)   | 0.96   | 1.00           | 0.32       | 0.98 (0.85, 1.14) | 0.83       | 0.99           | 1.05 (1.00, 1.10) | 0.633   | 1.05 (1.00, 1.10) | 0.633   | 1 / 1        | intron     |
| rs10896449  | 11q13  | 68994667  | G           | A           | 1.19 (1.15, 1.23)    | 0.52                  | 1.21 (1.16, 1.26) | 7.5e-18 | 1.00           | 0.4    | 1.19 (1.02, 1.38) | 0.03     | 1.00           | 0.091  | 1.07 (0.78, 1.46)   | 0.69   | 1.00           | 0.69       | 1.11 (0.96, 1.29) | 0.15       | 1.00           | 1.20 (1.15, 1.24) | 4.7e-19 | 1.20 (1.15, 1.24) | 4.7e-19 | 1 / 1        | intergenic |
| rs11568818  | 11q22  | 102401661 | A           | G           | 1.10 (1.06, 1.14)    | 0.55                  | 1.05 (1.01, 1.10) | 0.015   | 1.00           | 0.64   | 1.19 (1.01, 1.40) | 0.033    | 1.00           | 0.9    | 1.23 (0.87, 1.75)   | 0.24   | 0.95           | 0.55       | 1.03 (0.90, 1.18) | 0.65       | 1.00           | 1.06 (1.02, 1.11) | 0.0026  | 1.06 (1.02, 1.11) | 0.0026  | 1 / 1        | DHS        |
| rs11214775* | 11q23  | 113801781 | G           | A           | 1.07 (1.04, 1.09)    | 0.7                   | 1.06 (1.01, 1.11) | 0.017   | 1.00           | 0.76   | 1.13 (0.94, 1.36) | 0.18     | 0.99           | 0.75   | 0.94 (0.76, 1.16)   | 0.55   | 1.00           | 0.71       | 1.06 (0.91, 1.22) | 0.46       | 0.99           | 1.06 (1.01, 1.10) | 0.0099  | 1.06 (1.01, 1.10) | 0.0099  | 0.98 / 0.73  | intron     |
| rs80130819  | 12q13  | 48419618  | A           | C           | 1.14 (1.09, 1.18)    | 0.92                  | 1.06 (0.98, 1.14) | 0.18    | 0.98           | 0.93   | 0.90 (0.66, 1.23) | 0.51     | 0.97           | 0.99   | —                   | —      | 0.97           | 0.98       | 0.96 (0.61, 1.52) | 0.86       | 0.93           | 1.04 (0.97, 1.12) | 0.28    | 1.04 (0.97, 1.12) | 0.28    | 0.99 / 0.82  | intergenic |
| rs10875943  | 12q13  | 49676010  | C           | T           | 1.07 (1.04, 1.10)    | 0.29                  | 1.12 (1.07, 1.18) | 2.1e-06 | 0.95           | 0.33   | 1.03 (0.88, 1.21) | 0.72     | 1.00           | 0.82   | 1.44 (1.10, 1.89)   | 0.0085 | 1.00           | 0.61       | 1.15 (1.00, 1.32) | 0.043      | 1.00           | 1.12 (1.08, 1.17) | 6.6e-08 | 1.13 (1.05, 1.22) | 0.0013  | 0.99 / 0.77  | intergenic |
| rs902774    | 12q13  | 53273904  | A           | G           | 1.17 (1.11, 1.24)    | 0.15                  | 1.17 (1.11, 1.24) | 1e-07   | 0.99           | 0.13   | 1.09 (0.87, 1.36) | 0.45     | 0.99           | 0.027  | 1.18 (0.68, 2.02)   | 0.56   | 1.00           | 0.079      | 1.07 (0.84, 1.37) | 0.58       | 1.00           | 1.16 (1.10, 1.23) | 8.6e-08 | 1.16 (1.10, 1.23) | 8.6e-08 | 1 / 1        | DHS        |
| rs1270884   | 12q24  | 114685571 | A           | G           | 1.07 (1.04, 1.10)    | 0.48                  | 1.06 (1.02, 1.11) | 0.0048  | 0.99           | 0.38   | 1.12 (0.96, 1.32) | 0.15     | 0.99           | 0.28   | 0.93 (0.75, 1.15)   | 0.49   | 0.97           | 0.21       | 1.22 (1.03, 1.44) | 0.018      | 0.97           | 1.07 (1.03, 1.11) | 0.00667 | 1.08 (1.00, 1.17) | 0.044   | 0.99 / 0.84  | intergenic |
| rs9600079   | 13q22  | 73728139  | T           | G           | 1.01 (0.97, 1.06)    | 0.45                  | 1.02 (0.98, 1.06) | 0.37    | 1.00           | 0.41   | 1.09 (0.93, 1.27) | 0.3      | 1.00           | 0.46   | 1.09 (0.90, 1.32)   | 0.37   | 1.00           | 0.51       | 0.98 (0.85, 1.13) | 0.79       | 0.97           | 1.02 (0.98, 1.06) | 0.24    | 1.02 (0.98, 1.06) | 0.24    | 0.1 / 0.0023 | intergenic |
| rs8008270   | 14q22  | 53372330  | G           | A           | 1.12 (1.08, 1.17)    | 0.81                  | 1.07 (1.01, 1.13) | 0.018   | 1.00           | 0.86   | 1.19 (0.94, 1.51) | 0.14     | 1.00           | 0.99   | —                   | —      | 0.98           | 0.74       | 1.09 (0.93, 1.28) | 0.28       | 0.97           | 1.08 (1.02, 1.13) | 0.0045  | 1.08 (1.02, 1.13) | 0.0045  | 1 / 0.99     | intron     |
| rs7153648   | 14q23  | 61122526  | C           | G           | 1.11 (1.07, 1.14)    | 0.091                 | 1.08 (1.01, 1.17) | 0.036   | 0.95           | 0.11   | 1.11 (0.87, 1.43) | 0.39     | 0.93           | 0.2    | 1.12 (0.88, 1.41)   | 0.36   | 0.97           | 0.33       | 0.97 (0.84, 1.12) | 0.65       | 0.96           | 1.07 (1.00, 1.13) | 0.046   | 1.07 (1.00, 1.13) | 0.046   | 0.99 / 0.79  | intergenic |
| rs7141529   | 14q24  | 69126744  | G           | A           | 1.09 (1.06, 1.12)    | 0.51                  | 1.05 (1.01, 1.10) | 0.017   | 1.00           | 0.55   | 0.98 (0.84, 1.14) | 0.78     | 1.00           | 0.77   | 1.15 (0.91, 1.45)   | 0.24   | 1.00           | 0.53       | 1.01 (0.88, 1.15) | 0.93       | 1.00           | 1.05 (1.01, 1.09) | 0.02    | 1.05 (1.01, 1.09) | 0.02    | 1 / 0.99     | intergenic |
| rs8014671   | 14q24  | 71092256  | G           | A           | 1.06 (1.04, 1.08)    | 0.58                  | 1.01 (0.97, 1.05) | 0.66    | 0.99           | 0.57   | 1.02 (0.87, 1.19) | 0.84     | 0.99           | 0.37   | 1.05 (0.86, 1.28)   | 0.63   | 0.97           | 0.47       | 1.00 (0.87, 1.14) | 0.95       | 0.97           | 1.01 (0.97, 1.05) | 0.6     | 1.01 (0.97, 1.05) | 0.6     | 0.97 / 0.64  | intergenic |
| rs12051443  | 16q22  | 71691329  | A           | G           | 1.06 (1.04, 1.08)    | 0.33                  | 1.01 (0.97, 1.06) | 0.62    | 1.00           | 0.44   | 1.04 (0.89, 1.21) | 0.63     | 1.00           | 0.69   | 1.05 (0.86, 1.29)   | 0.63   | 1.00           | 0.27       | 1.06 (0.91, 1.23) | 0.46       | 0.99           | 1.02 (0.98, 1.06) | 0.38    | 1.02 (0.98, 1.06) | 0.38    | 0.96 / 0.6   | intron     |
| rs684232    | 17p13  | 618965    | G           | A           | 1.10 (1.07, 1.14)    | 0.35                  | 1.08 (1.03, 1.13) | 0.0012  | 0.98           | 0.41   | 1.04 (0.89, 1.21) | 0.64     | 0.98           | 0.59   | 0.96 (0.79, 1.16)   | 0.67   | 0.99           | 0.64       | 1.01 (0.87, 1.16) | 0.93       | 1.00           | 1.06 (1.02, 1.11) | 0.0028  | 1.06 (1.02, 1.11) | 0.0028  | 1 / 1        | DHS        |
| rs11649743  | 17q12  | 36074979  | G           | A           | 1.15 (1.09, 1.21)    | 0.81                  | 1.15 (1.09, 1.22) | 1e-06   | 0.99           | 0.83   | 1.10 (0.89, 1.36) | 0.37     | 0.99           | 0.67   | 1.18 (0.96, 1.44)   | 0.12   | 0.99           | 0.91       | 0.95 (0.73, 1.24) | 0.69       | 0.82           | 1.14 (1.08, 1.20) | 5.9e-07 | 1.14 (1.08, 1.20) | 5.9e-07 | 1 / 1        | DHS        |
| rs7501939   | 17q12  | 36101156  | C           | T           | 1.22 (1.17, 1.27)    | 0.6                   | 1.19 (1.14, 1.24) | 9.9e-15 | 1.00           | 0.64   | 1.18 (1.00, 1.38) | 0.05     | 1.00           | 0.72   | 1.13 (0.91, 1.39)   | 0.27   | 1.00           | 0.5        | 1.04 (0.91, 1.19) | 0.55       | 1.00           | 1.17 (1.13, 1.22) | 4.2e-15 | 1.16 (1.09, 1.23) | 5.8e-07 | 1 / 1        | DHS        |
| rs11650494  | 17q21  | 47345186  | A           | G           | 1.15 (1.09, 1.22)    | 0.086                 | 1.07 (0.99, 1.16) | 0.072   | 0.99           | 0.068  | 0.91 (0.66, 1.24) | 0.54     | 0.98           | 0.011  | 0.74 (0.27, 2.09)   | 0.58   | 0.98           | 0.24       | 0.93 (0.79, 1.09) | 0.37       | 0.97           | 1.04 (0.97, 1.11) | 0.29    | 1.02 (0.92, 1.12) | 0.75    | 1 / 0.96     | intergenic |
| rs211001*   | 17q21  | 4736749   | A           | G           | 1.51 (1.35, 1.69)    | 0.0001                | —                 | —       | 0.94           | 0.0034 | —                 | —        | 1.00           | 0.0002 | —                   | —      | 0.80           | 0.056      | 1.06 (0.79, 1.41) | 0.71       | 1.00           | 1.06 (0.79, 1.41) | 0.71    | 1.06 (0.79, 1.41) | 0.71    | 0.87 / 0.34  | intron     |
| rs1859962   | 17q24  | 69108753  | G           | T           | 1.19 (1.14, 1.24)    | 0.48                  | 1.13 (1.09, 1.18) | 7.7e-09 | 1.00           | 0.55   | 1.16 (0.99, 1.36) | 0.06     | 1.00           | 0.4    | 1.03 (0.85, 1.24)   | 0.79   | 1.00           | 0.32       | 1.08 (0.93, 1.24) | 0.31       | 0.97           | 1.13 (1.08, 1.17) | 1.6e-09 | 1.13 (1.08, 1.17) | 1.6e-09 | 1 / 1        | DHS        |
| rs7241993   | 18q23  | 76737973  | G           | A           | 1.09 (1.05, 1.12)    | 0.69                  | 1.04 (0.99, 1.09) | 0.14    | 1.00           | 0.7    | 1.13 (0.95, 1.35) | 0.15     | 1.00           | 0.61   | 0.93 (0.77, 1.13)   | 0.46   | 1.00           | 0.47       | 1.06 (0.92, 1.21) | 0.43       | 1.00           | 1.04 (1.00, 1.08) | 0.079   | 1.04 (1.00, 1.08) | 0.079   | 1 / 0.97     | intergenic |
| rs8102476   | 19q13  | 38735613  | C           | T           | 1.12 (1.08, 1.15)    | 0.56                  | 1.09 (1.04, 1.14) | 0.0002  | 0.98           | 0.53   | 1.02 (0.88, 1.19) | 0.79     | 1.00           | 0.41   | 1.26 (1.04, 1.53)   | 0.02   | 0.98           | 0.73       | 1.12 (0.96, 1.31) | 0.14       | 1.00           | 1.09 (1.05, 1.14) | 1.8e-05 | 1.09 (1.05, 1.14) | 1.8e-05 | 1 / 1        | intergenic |
| rs11672691  | 19q13  | 41985387  | G           | A           | 1.08 (1.05, 1.12)    | 0.75                  | 1.03 (0.98, 1.09) | 0.2     | 0.95           | 0.76   | 1.01 (0.85, 1.22) | 0.88     | 0.96           | 0.59   | 1.11 (0.91, 1.34)   | 0.3    | 0.99           | 0.26       | 1.04 (0.89, 1.21) | 0.62       | 0.93           | 1.04 (0.99, 1.09) | 0.12    | 1.04 (0.99, 1.09) | 0.12    | 0.99 / 0.85  | DHS        |
| rs2735839   | 19q13  | 51384623  | G           | A           | 1.15 (1.08, 1.22)    | 0.85                  | 1.20 (1.13, 1.28) | 1.6e-08 | 1.00           | 0.79   | 1.21 (1.00, 1.47) | 0.052    | 1.00           | 0.58   | 1.15 (0.95, 1.40)   | 0.15   | 1.00           | 0.7        | 1.02 (0.88, 1.18) | 0.8        | 1.00           | 1.17 (1.11, 1.24) | 5.7e-09 | 1.16 (1.07, 1.25) | 0.00012 | 1 / 1        | DHS        |
| rs103294*   | 19q13  | 54797848  | C           | T           | 1.25 (1.21, 1.36)    | 0.8                   | 0.98 (0.93, 1.03) | 0.39    | 1.00           | 0.75   | 1.09 (0.91, 1.30) | 0.35     | 1.00           | 0.55   | 0.98 (0.82, 1.17)   | 0.83   | 1.00           | 0.9        | 0.97 (0.78, 1.21) |            |                |                   |         |                   |         |              |            |



**Table S5:** Risk score of and variance explained by the 105 previously reported hits. PCs, top 10 principal components (for race/ethnicity group) for ancestry; \*The KP Asian risk score excludes rs7210100 and rs6983561, as they have  $r^2 = 0.87$  and  $r^2 = 0.44$ , respectively, to other previously reported SNPs in the risk score (there were no other SNPs with pairwise  $r^2 > 0.3$  in any of the race/ethnicity groups).

|                                 | KP NH white            | KP Latino             | KP Asian*            | KP Af-Amer             |
|---------------------------------|------------------------|-----------------------|----------------------|------------------------|
| Risk score p                    | $2.0 \times 10^{-211}$ | $3.5 \times 10^{-16}$ | $1.0 \times 10^{-8}$ | $1.10 \times 10^{-15}$ |
| $r^2$ age, BMI                  | 0.073                  | 0.122                 | 0.101                | 0.051                  |
| $r^2$ age, BMI, risk score      | 0.123                  | 0.156                 | 0.121                | 0.099                  |
| $r^2$ age, BMI, PCs             | 0.076                  | 0.147                 | 0.112                | 0.060                  |
| $r^2$ age, BMI, PCs, risk score | 0.127                  | 0.183                 | 0.138                | 0.104                  |

**Figure S1:** Manhattan plots and Q-Q plots of each race/ethnicity, and of the meta-analysis, followed by conditional analysis plots. In the race/ethnicity-specific plots, the triangles are imputed SNPs, whereas the circles are based on the genotyped SNPs; in the meta-analysis all points are imputed. The color coding of the plot is described in the legend, where “<0.5Mb prev. known” indicates that a SNP was previously identified to be a prostate cancer risk variant, and that the current SNP is within 0.5 megabases of that SNP (a 1 megabase window).

(S1.1) Round 0 of non-Hispanic white race/ethnicity.  $\lambda_{\text{typed}} = 1.063$ ,  $\lambda_{\text{imputed}} = 1.058$

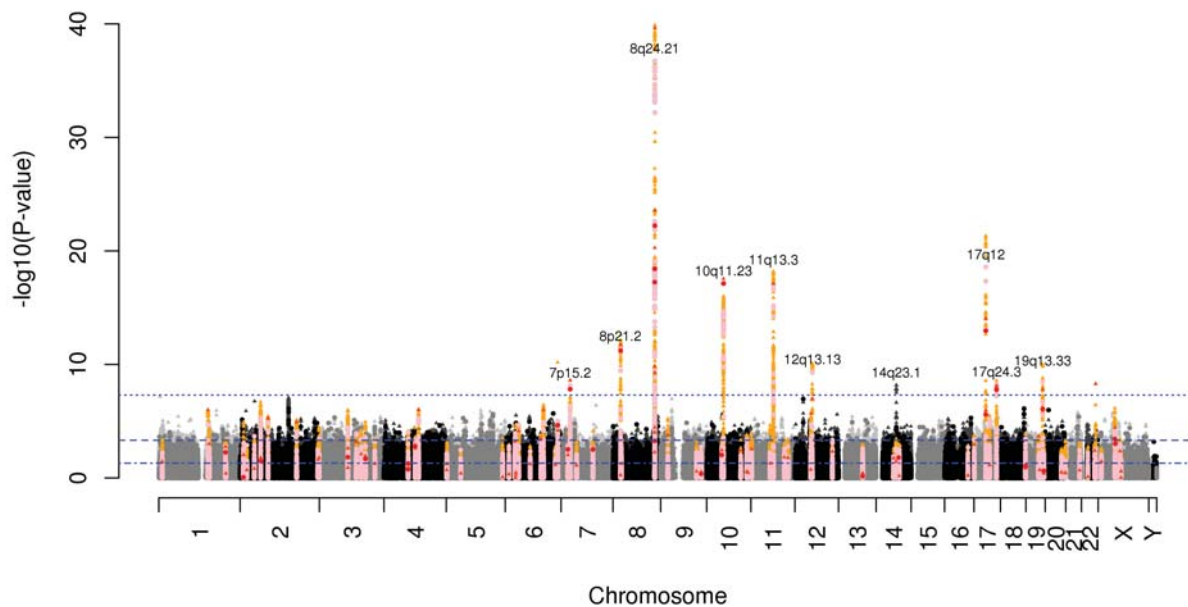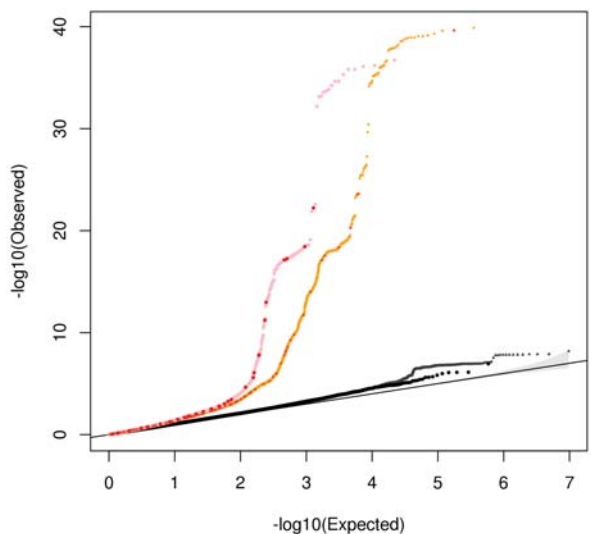

(S1.2) Round 0 of African American race/ethnicity.  $\lambda_{\text{typed}} = 1.040$ ,  $\lambda_{\text{imputed}} = 1.009$

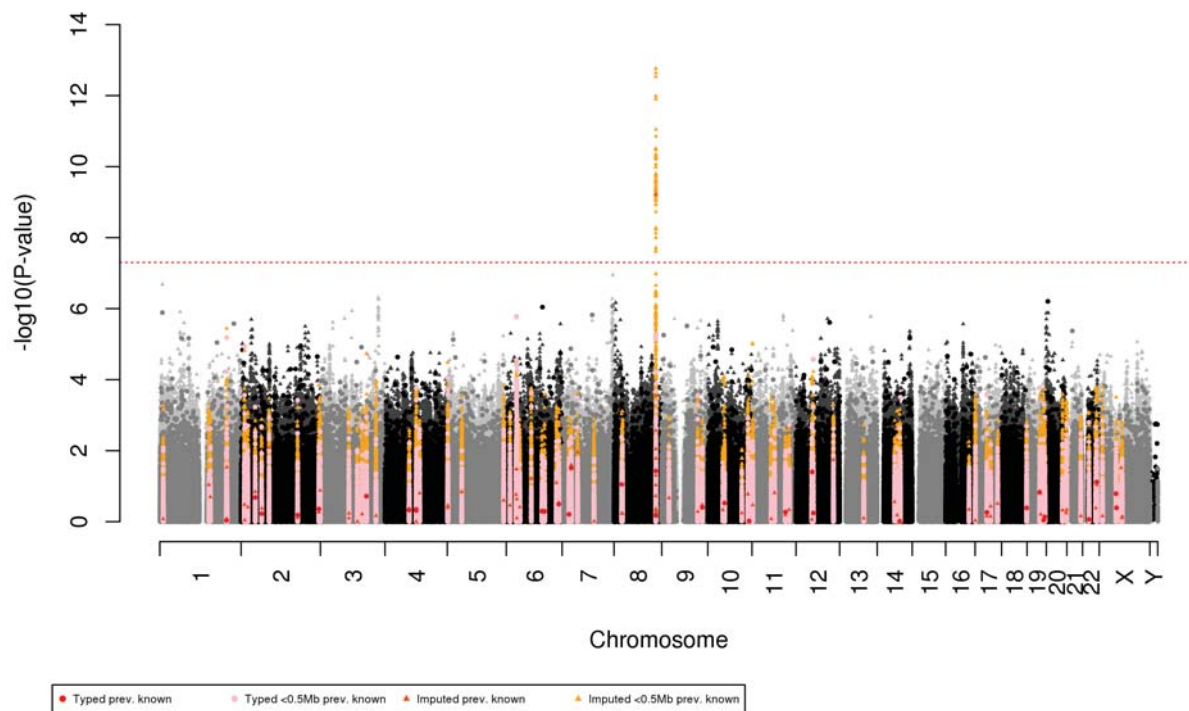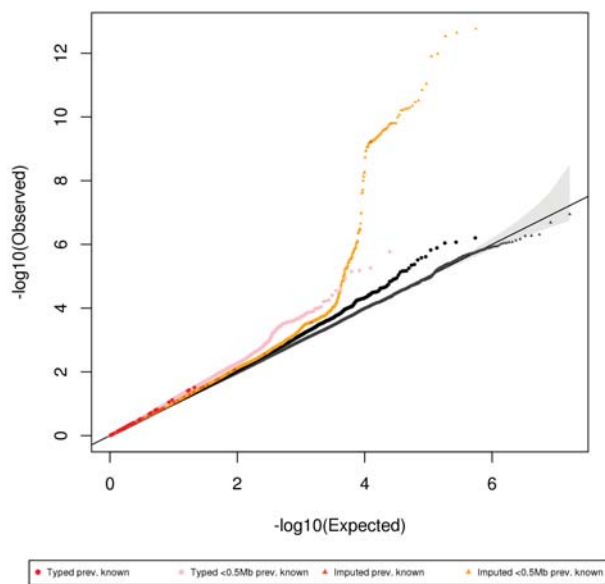

(S1.3) Round 0 of Asian race/ethnicity.  $\lambda_{\text{typed}} = 1.025$ ,  $\lambda_{\text{imputed}} = 1.015$

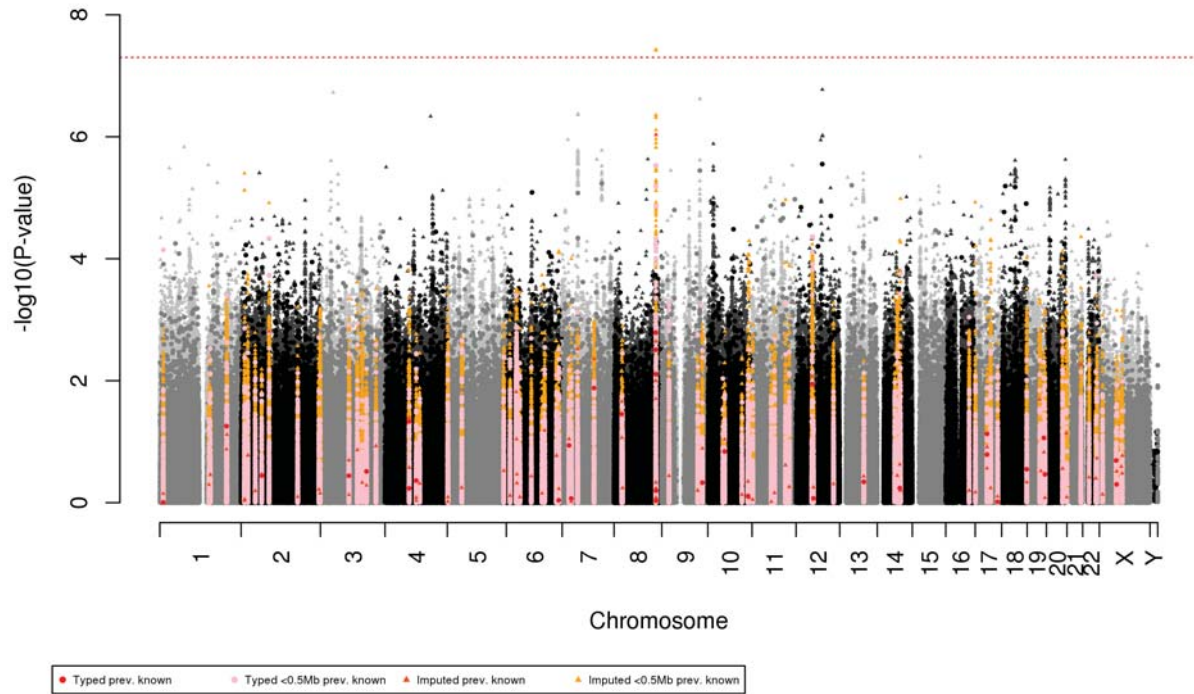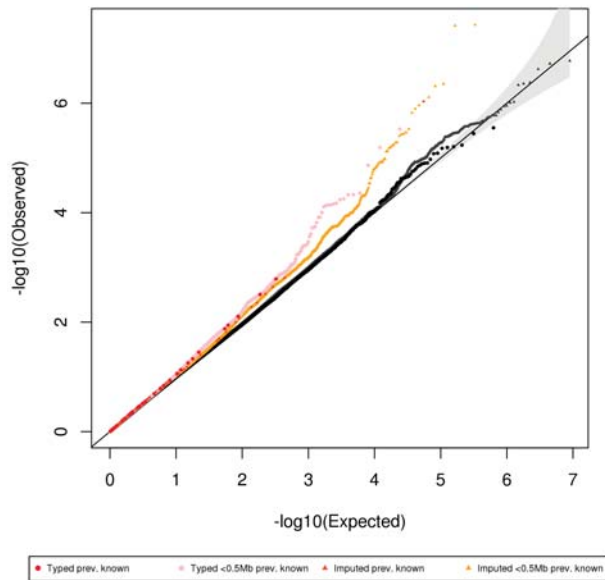

(S1.4) Round 0 of Latino race/ethnicity.  $\lambda_{\text{typed}} = 1.035$ ,  $\lambda_{\text{imputed}} = 1.017$

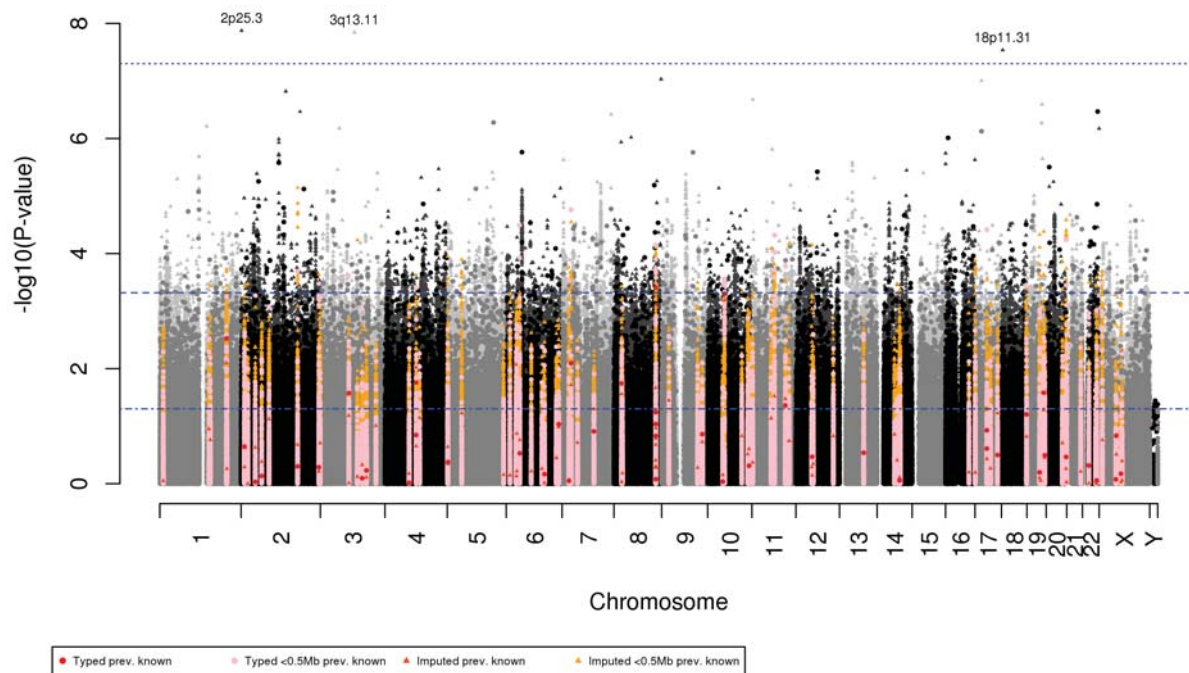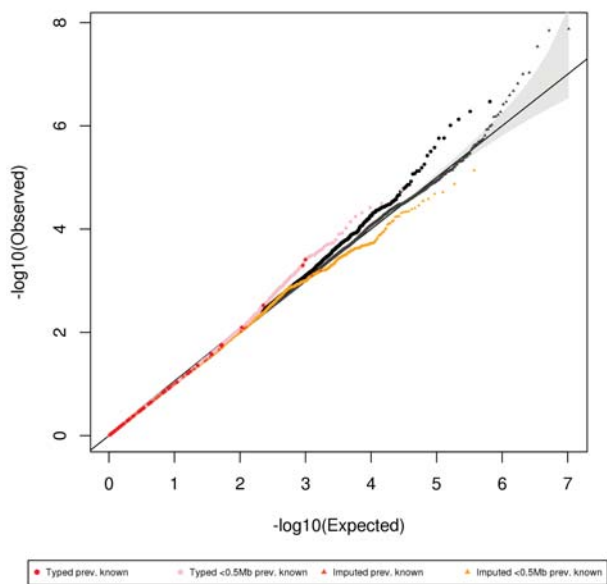

(S1.5) Round 0 of Meta-analysis fixed effects.  $\lambda = 1.052$

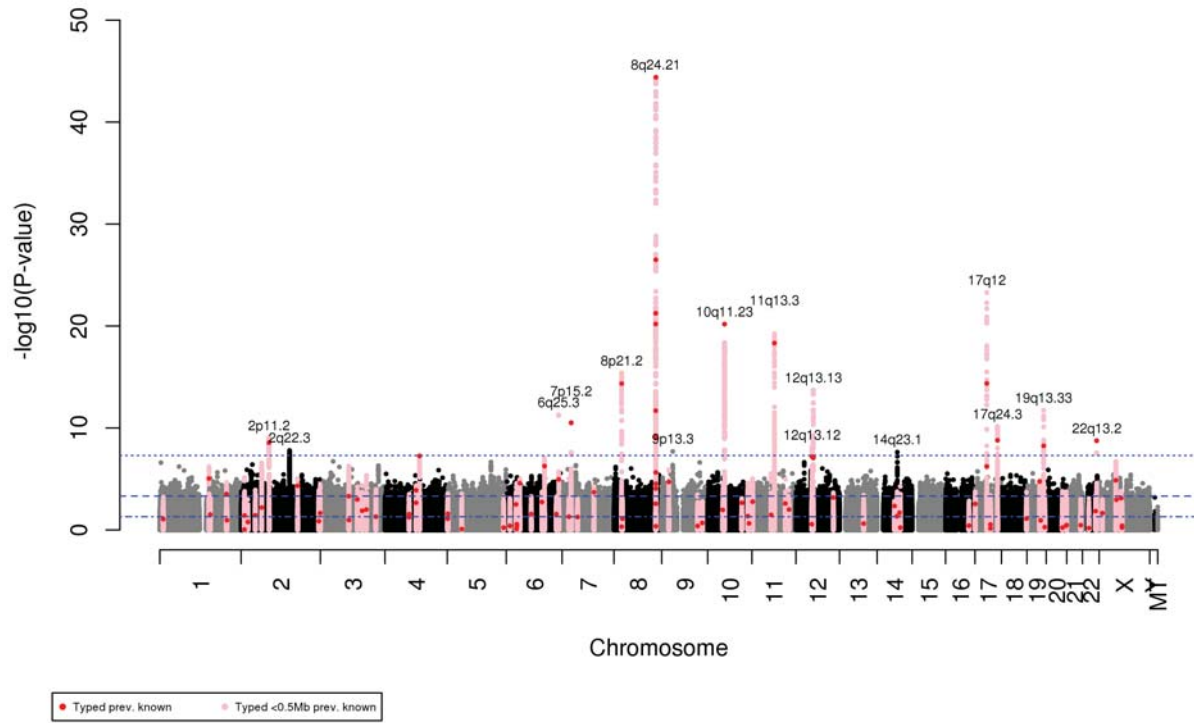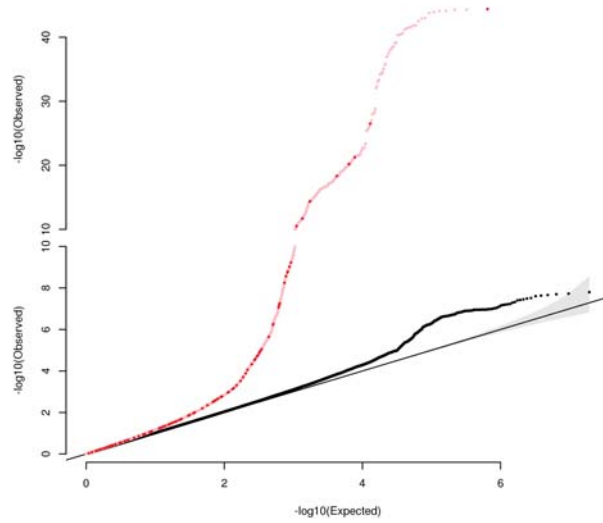

(S1.6) Round 0 of Meta-analysis random effects.  $\lambda = 0.872$

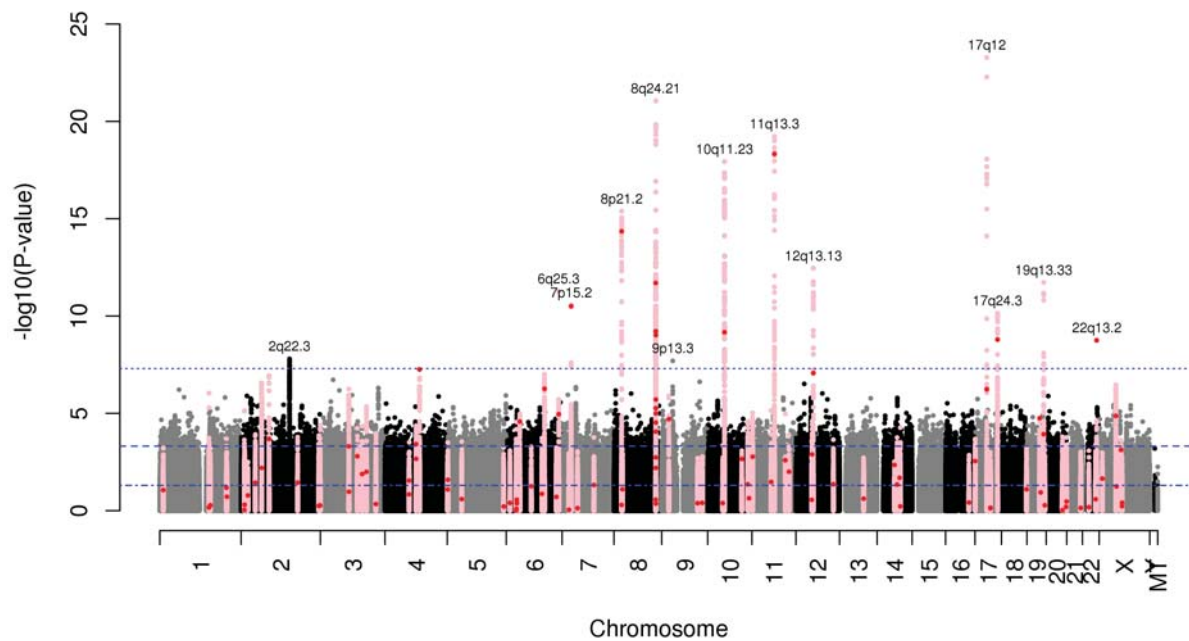

• Typed prev. known    • Typed <0.5Mb prev. known

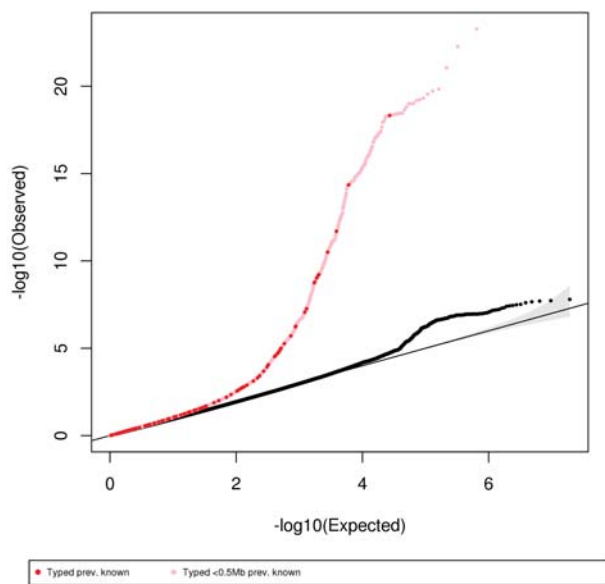

• Typed prev. known    • Typed <0.5Mb prev. known



(S1.7) Round 1 of non-Hispanic white race/ethnicity.  $\lambda_{\text{typed}} = 1.065$ ,  $\lambda_{\text{imputed}} = 1.047$

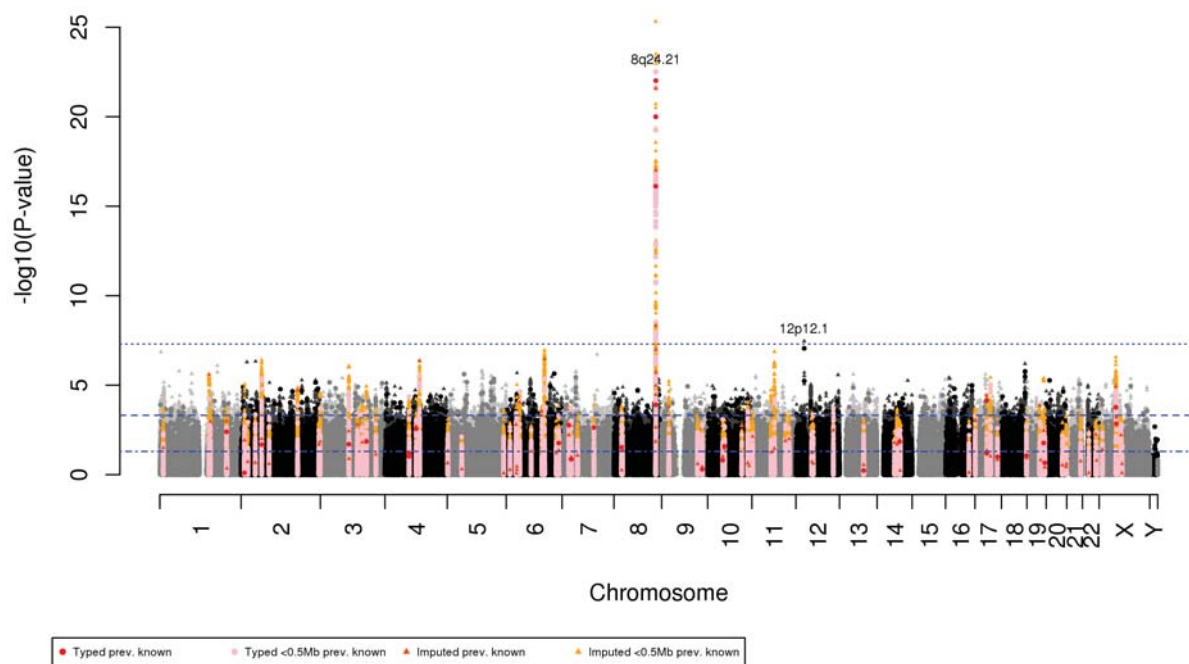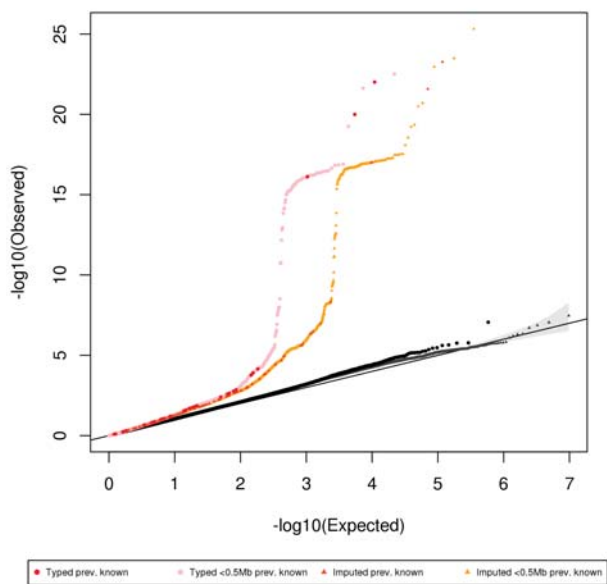

(S1.8) Round 1 of African American race/ethnicity.  $\lambda_{\text{typed}} = 1.039$ ,  $\lambda_{\text{imputed}} = 0.999$

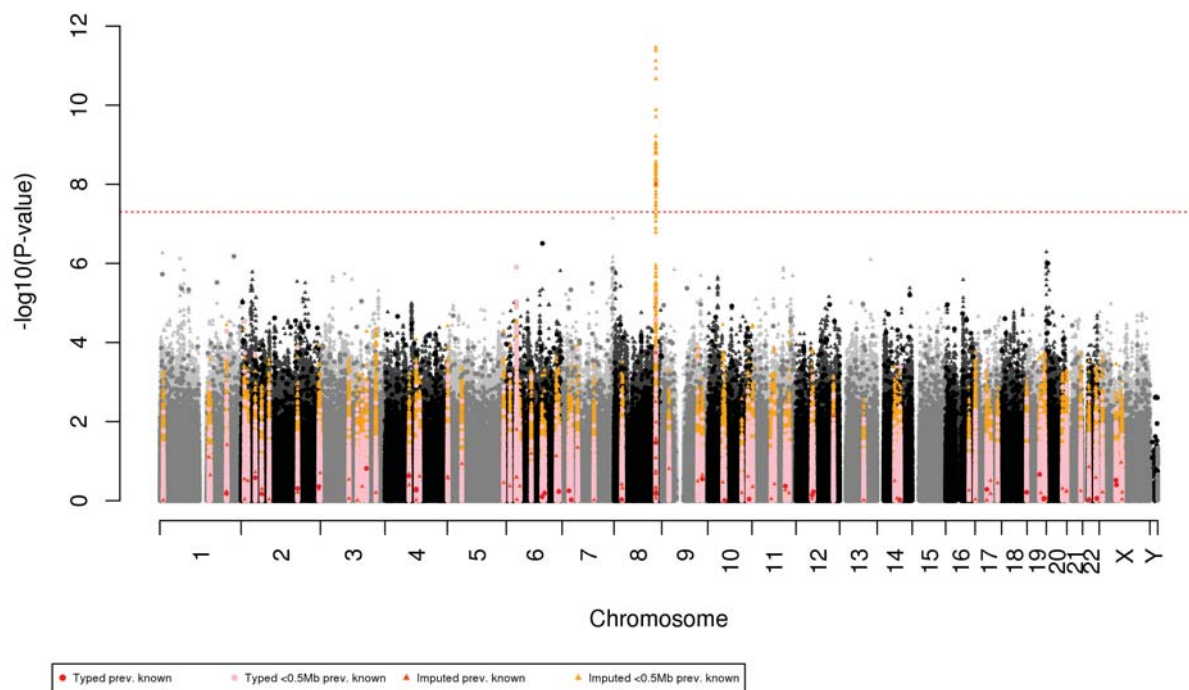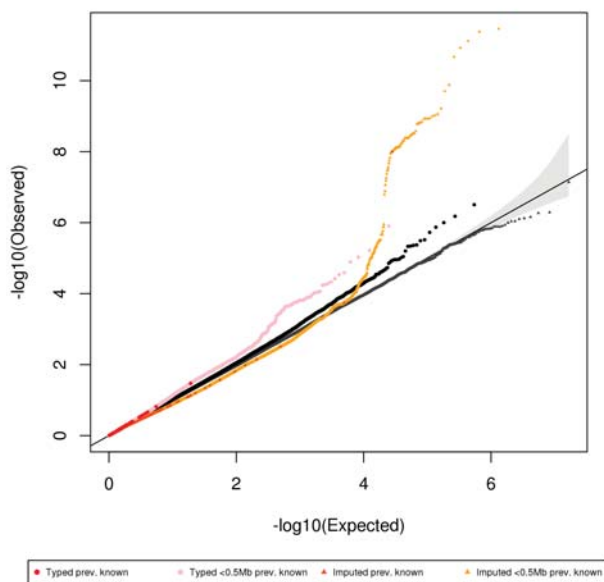

(S1.9) Round 1 of Asian race/ethnicity.  $\lambda_{\text{typed}} = 1.026$ ,  $\lambda_{\text{imputed}} = 0.982$

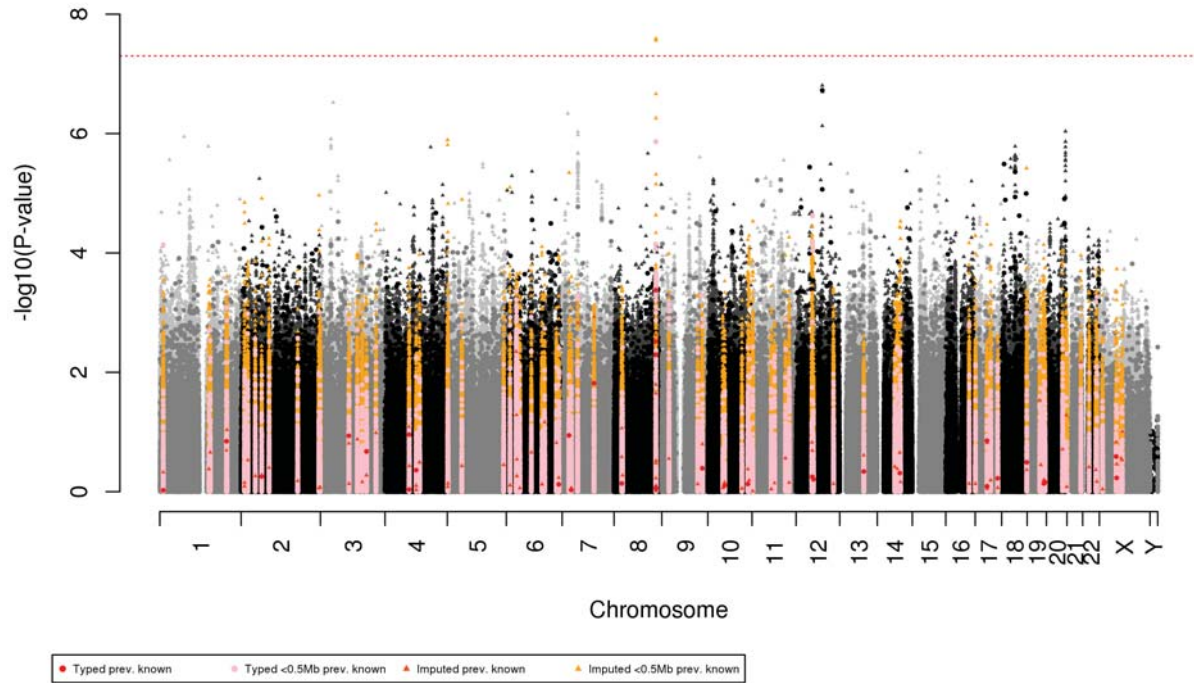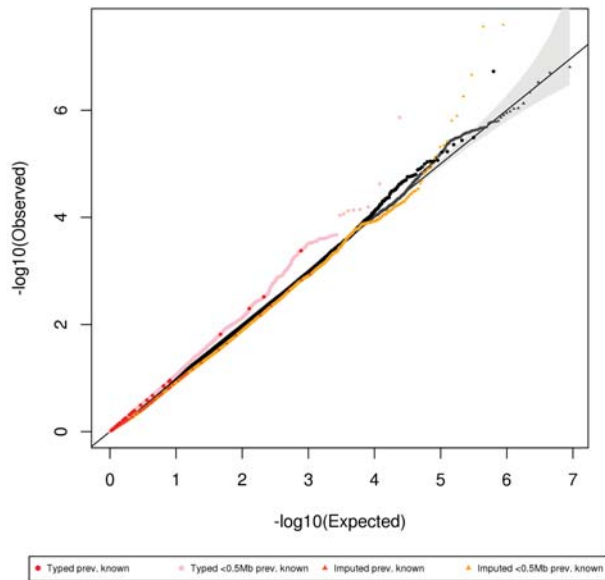

(S1.10) Round 1 of Latino race/ethnicity.  $\lambda_{\text{typed}} = 1.029$ ,  $\lambda_{\text{imputed}} = 0.996$

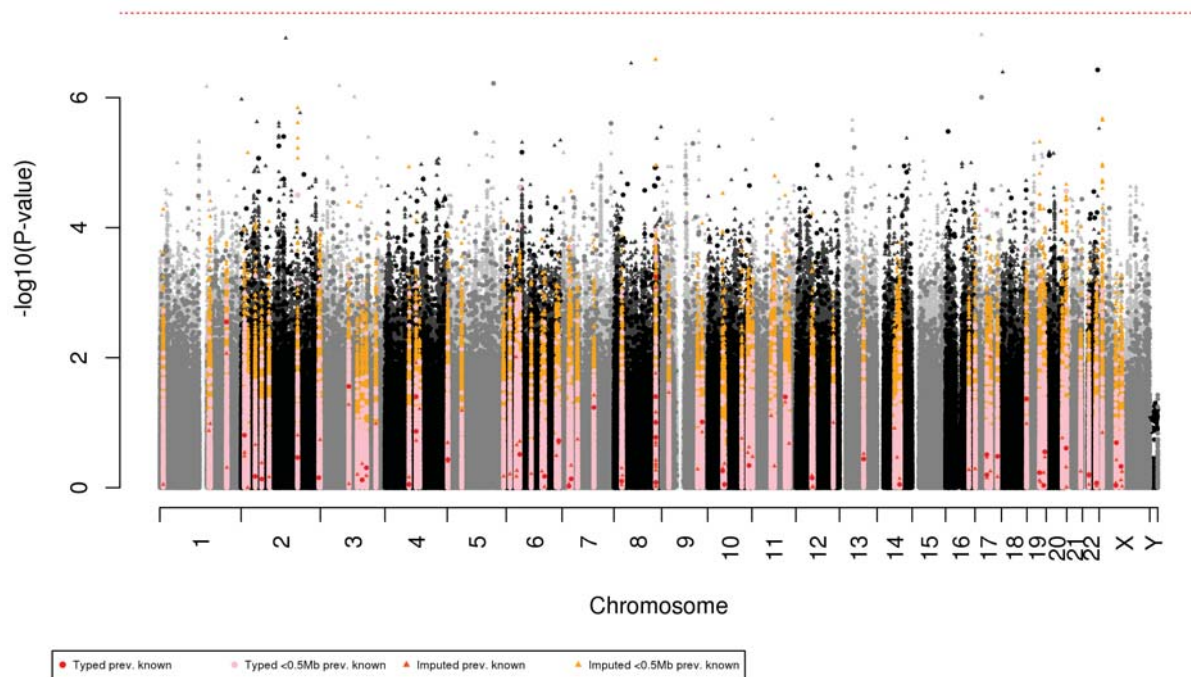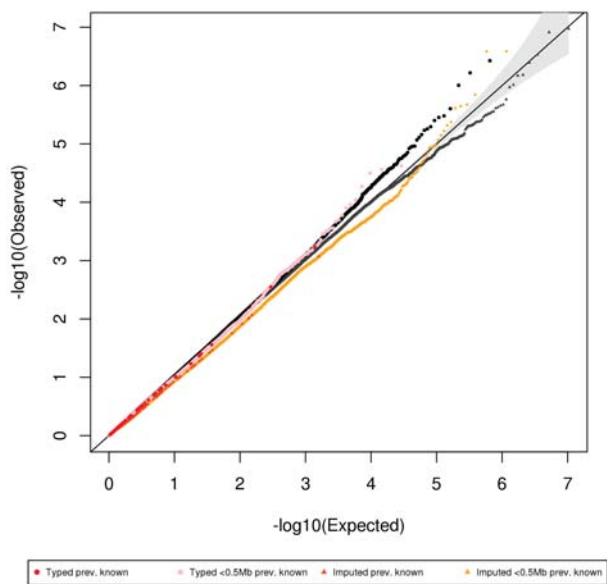

(S1.11) Round 1 of Meta-analysis fixed effects.  $\lambda = 1.053$

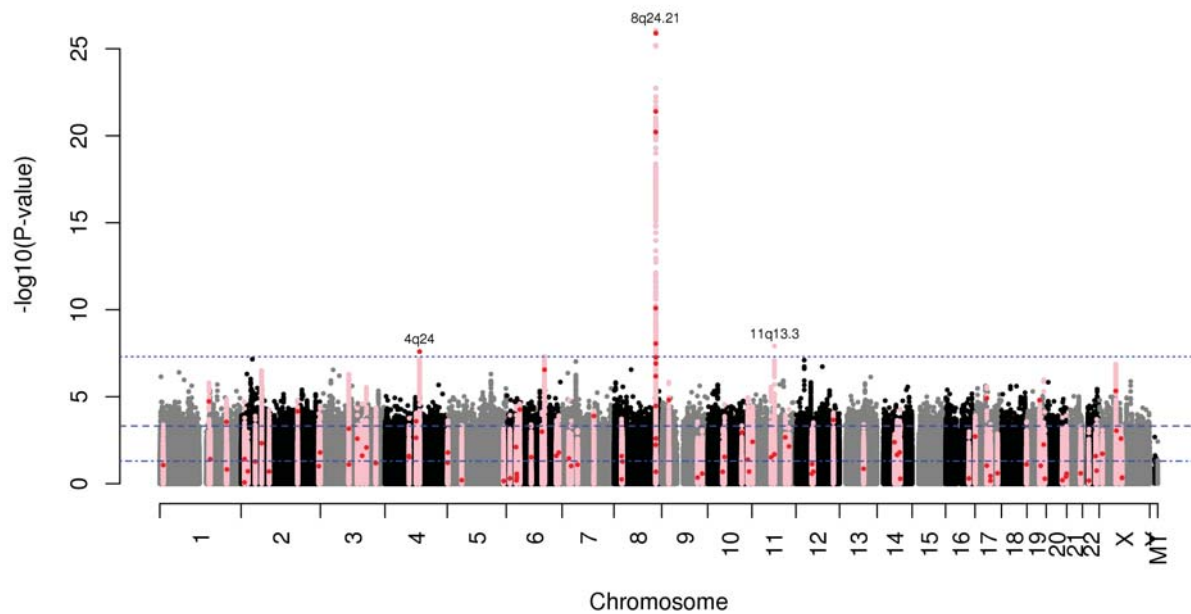

• Typed prev. known    • Typed <0.5Mb prev. known

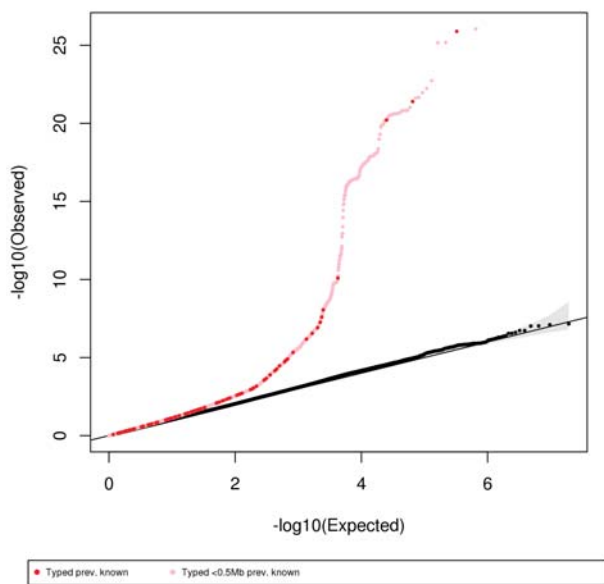

(S1.12) Round 1 of Meta-analysis random effects.  $\lambda = 0.872$

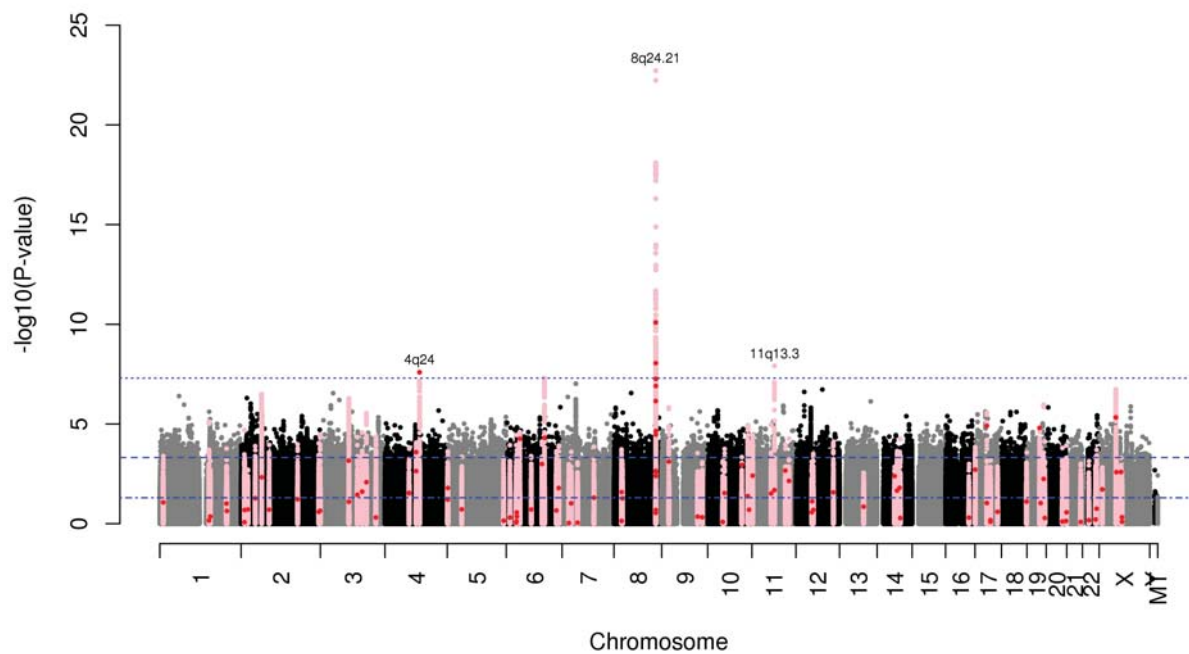

• Typed prev. known    • Typed <0.5Mb prev. known

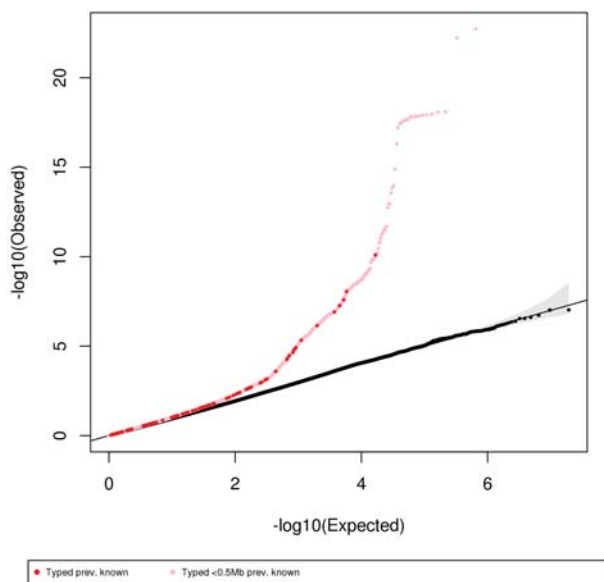

• Typed prev. known    • Typed <0.5Mb prev. known

(S1.13) Round 2 of non-Hispanic white race/ethnicity.  $\lambda_{\text{typed}} = 1.065$ ,  $\lambda_{\text{imputed}} = 1.047$

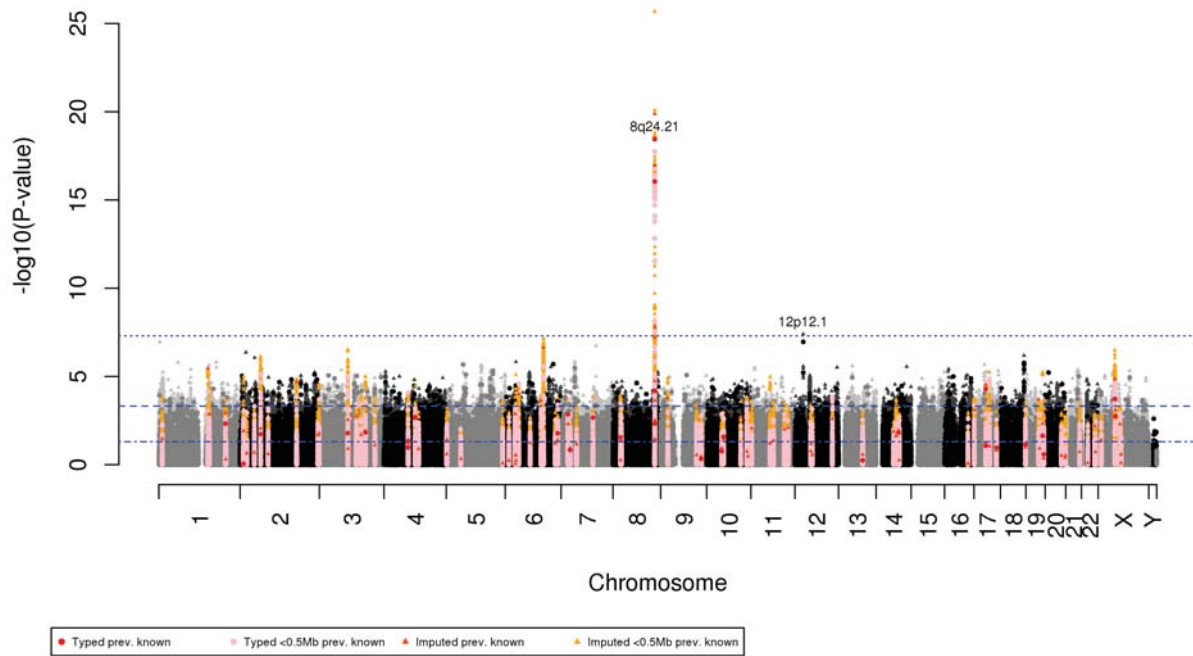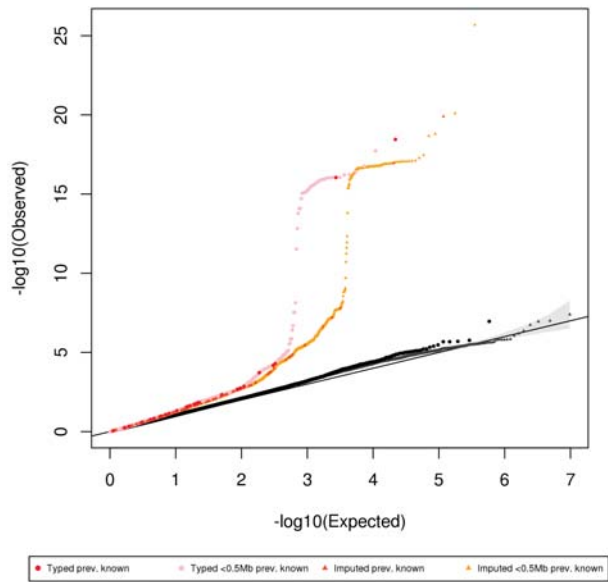



(S1.14) Round 2 of African American race/ethnicity.  $\lambda_{\text{typed}} = 1.039$ ,  $\lambda_{\text{imputed}} = 0.999$

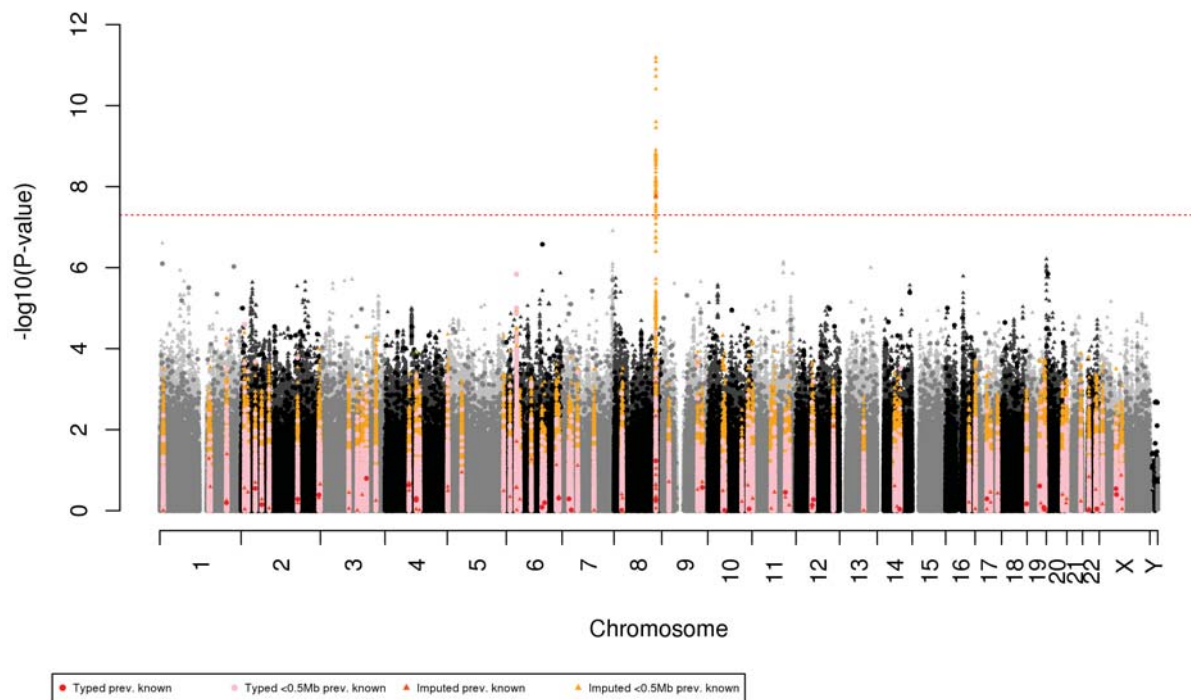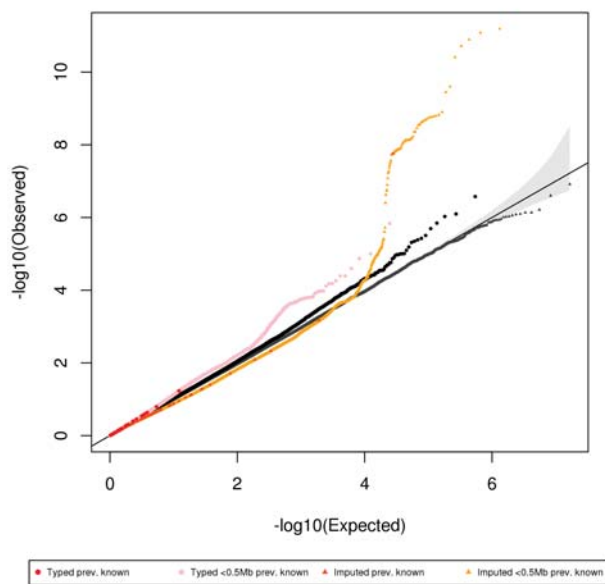

(S1.15) Round 2 of Asian race/ethnicity.  $\lambda_{\text{typed}} = 1.025$ ,  $\lambda_{\text{imputed}} = 0.981$

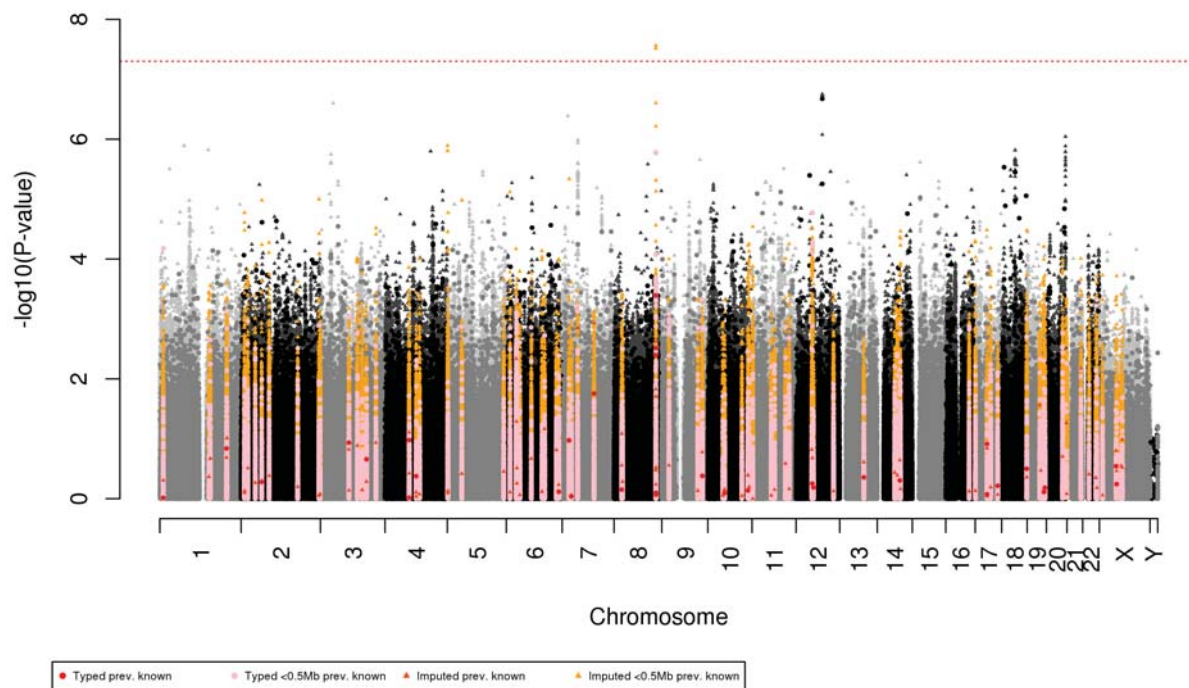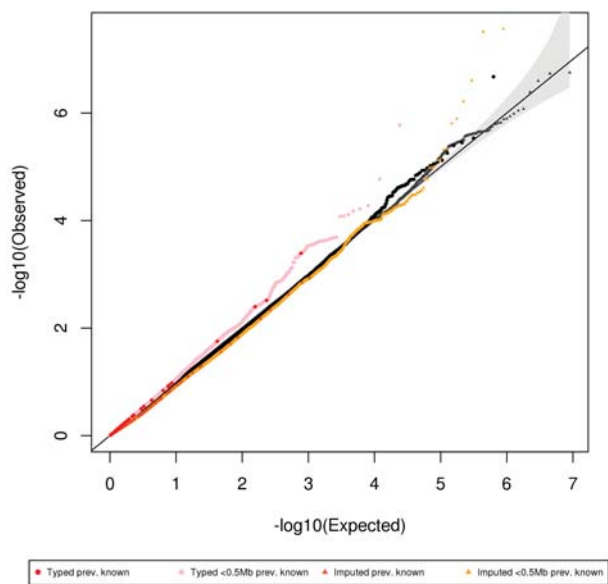

(S1.16) Round 2 of Latino race/ethnicity.  $\lambda_{\text{typed}} = 1.030$ ,  $\lambda_{\text{imputed}} = 0.997$

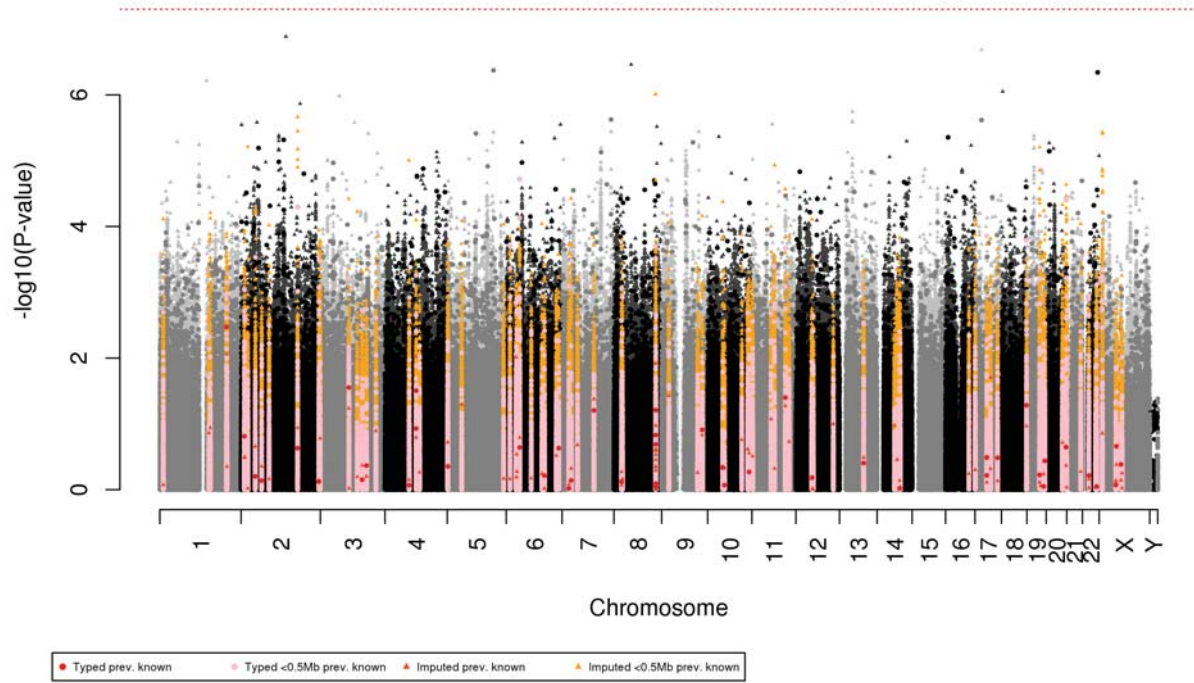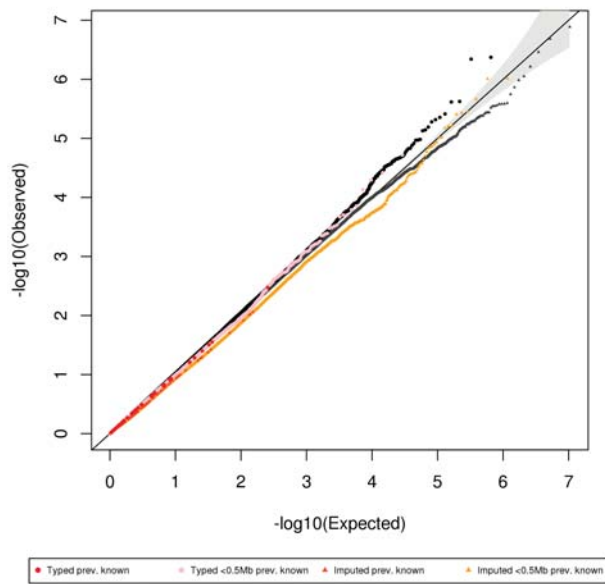

(S1.17) Round 2 of Meta-analysis fixed effects.  $\lambda = 1.053$

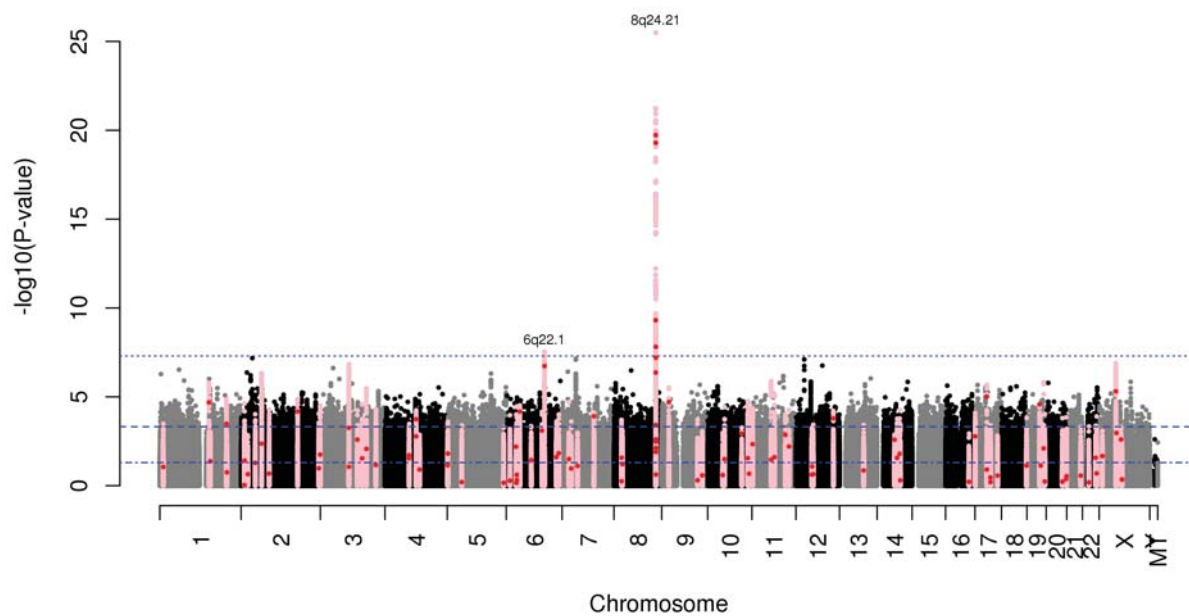

• Typed prev. known    • Typed <0.5Mb prev. known

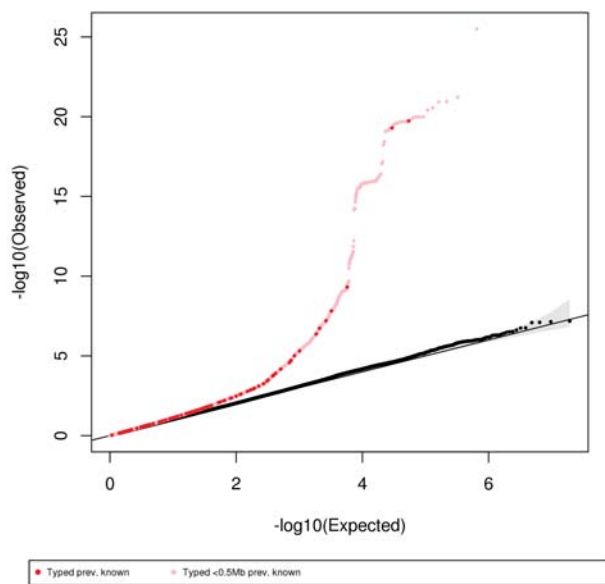

• Typed prev. known    • Typed <0.5Mb prev. known

(S1.18) Round 2 of Meta-analysis random effects.  $\lambda = 0.872$

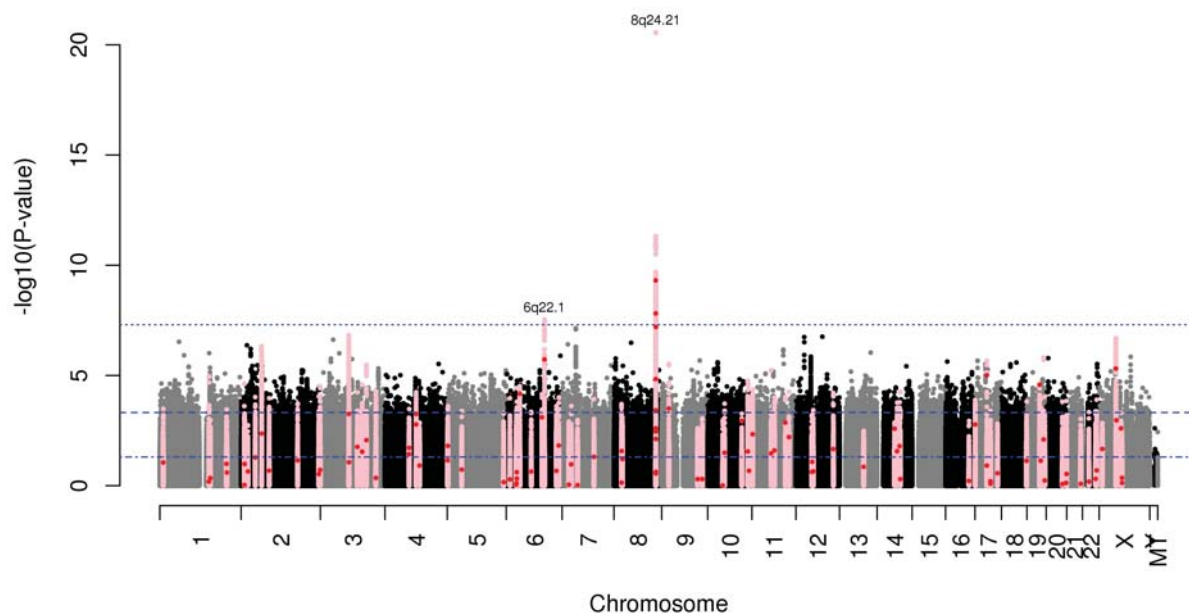

• Typed prev. known    • Typed <0.5Mb prev. known

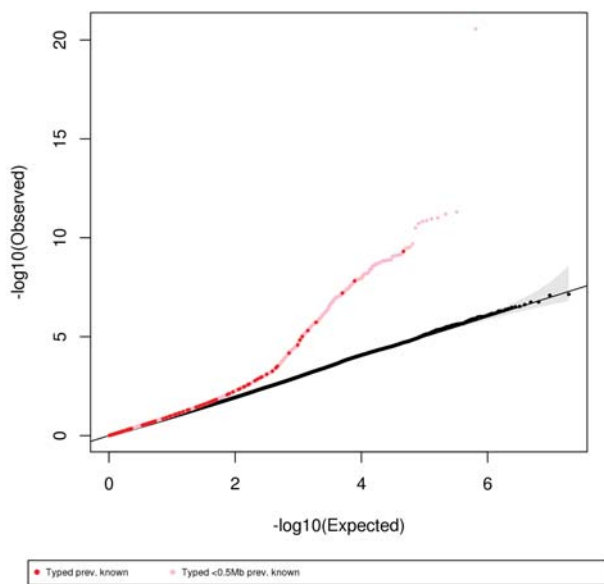

(S1.19) Round 3 of non-Hispanic white race/ethnicity.  $\lambda_{\text{typed}} = 1.065$ ,  $\lambda_{\text{imputed}} = 1.046$

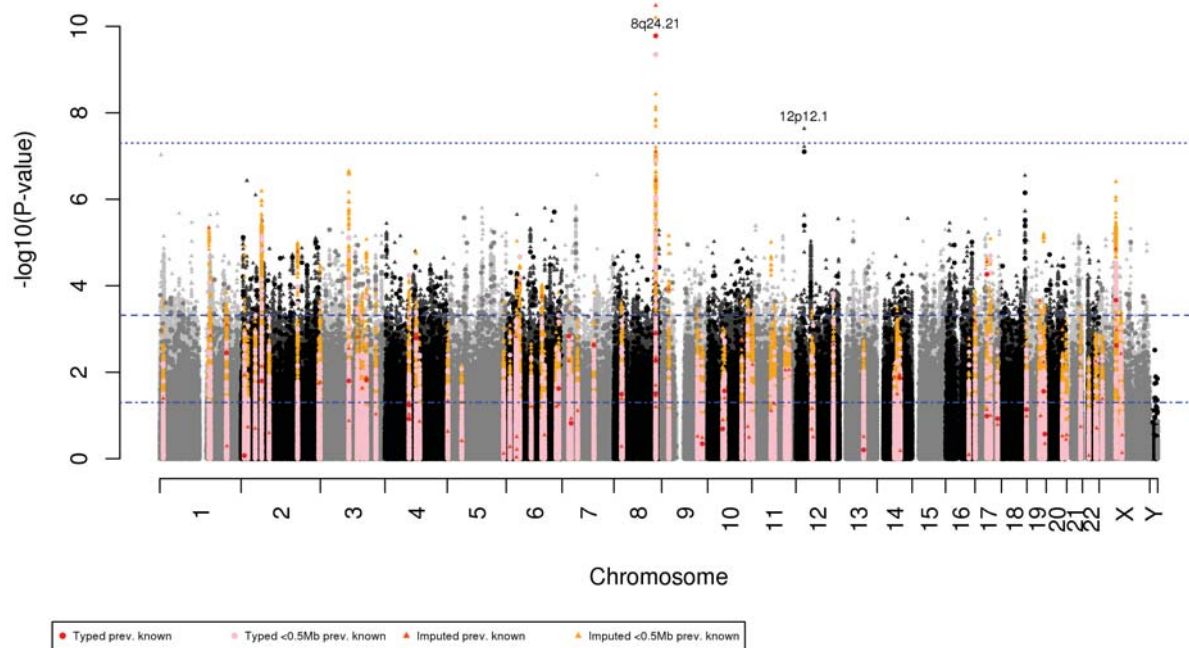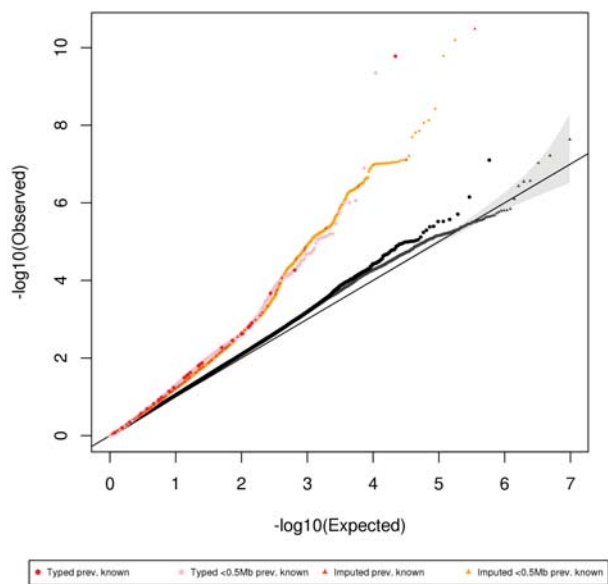



(S1.20) Round 3 of African American race/ethnicity.  $\lambda_{\text{typed}} = 1.038$ ,  $\lambda_{\text{imputed}} = 1.000$

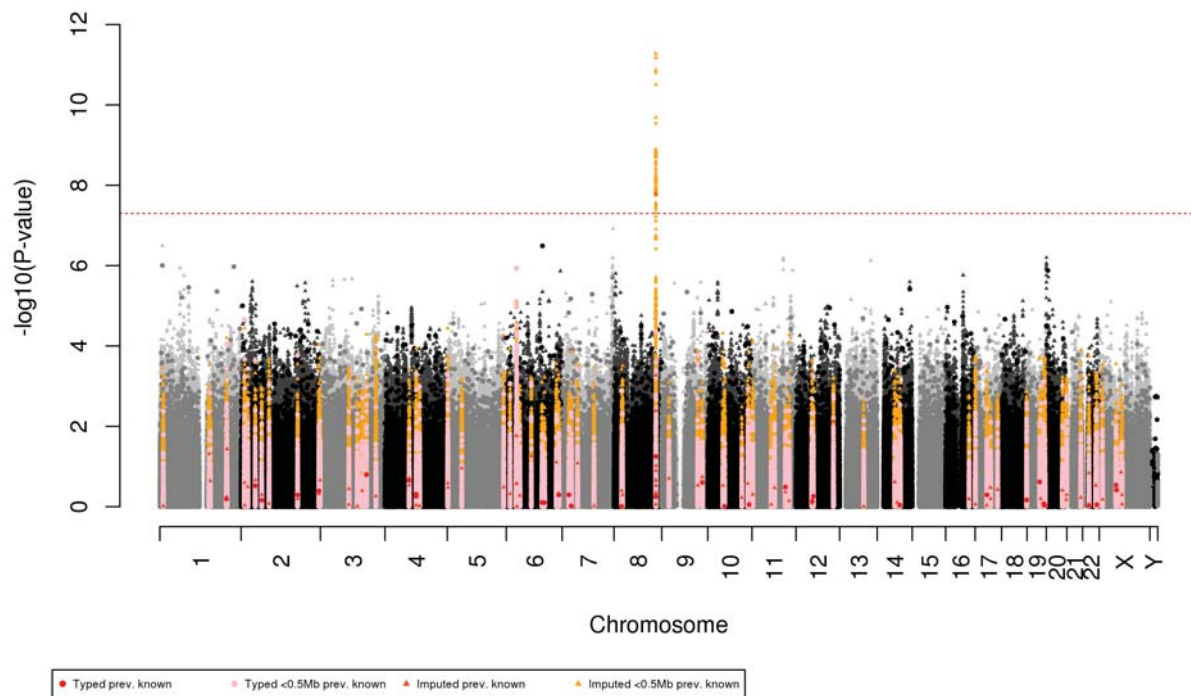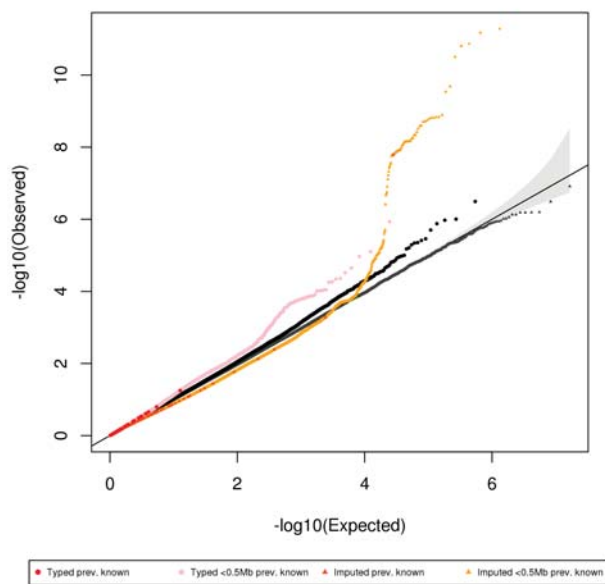



(S1.21) Round 3 of Asian race/ethnicity.  $\lambda_{\text{typed}} = 1.029$ ,  $\lambda_{\text{imputed}} = 0.983$

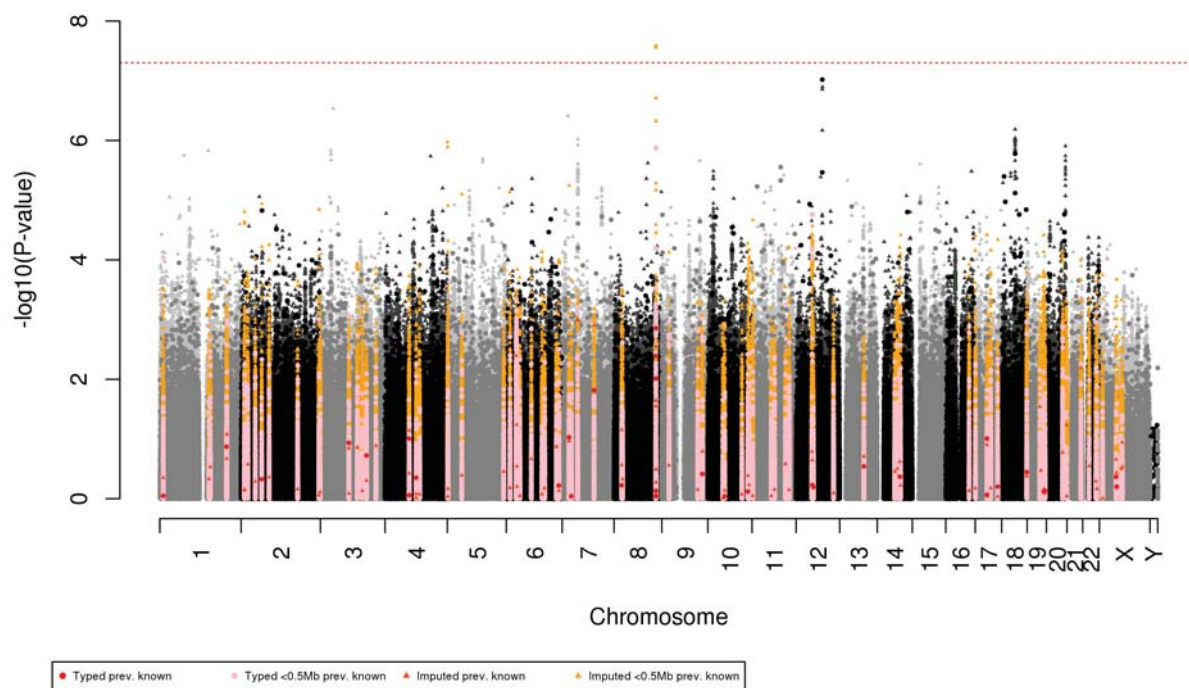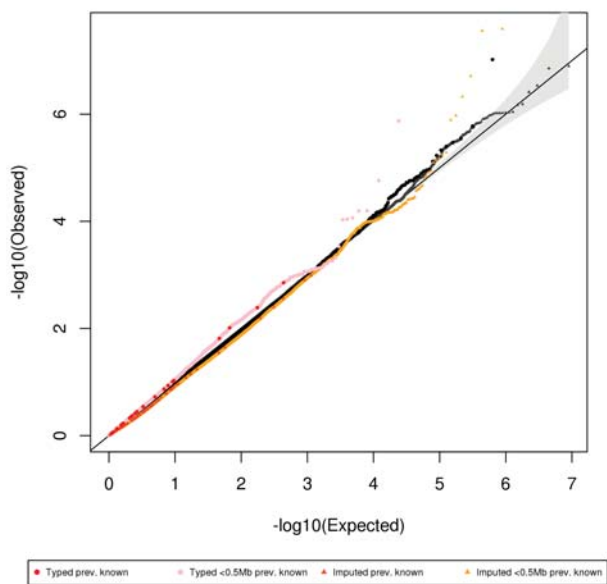

(S1.22) Round 3 of Latino race/ethnicity.  $\lambda_{\text{typed}} = 1.030$ ,  $\lambda_{\text{imputed}} = 0.996$

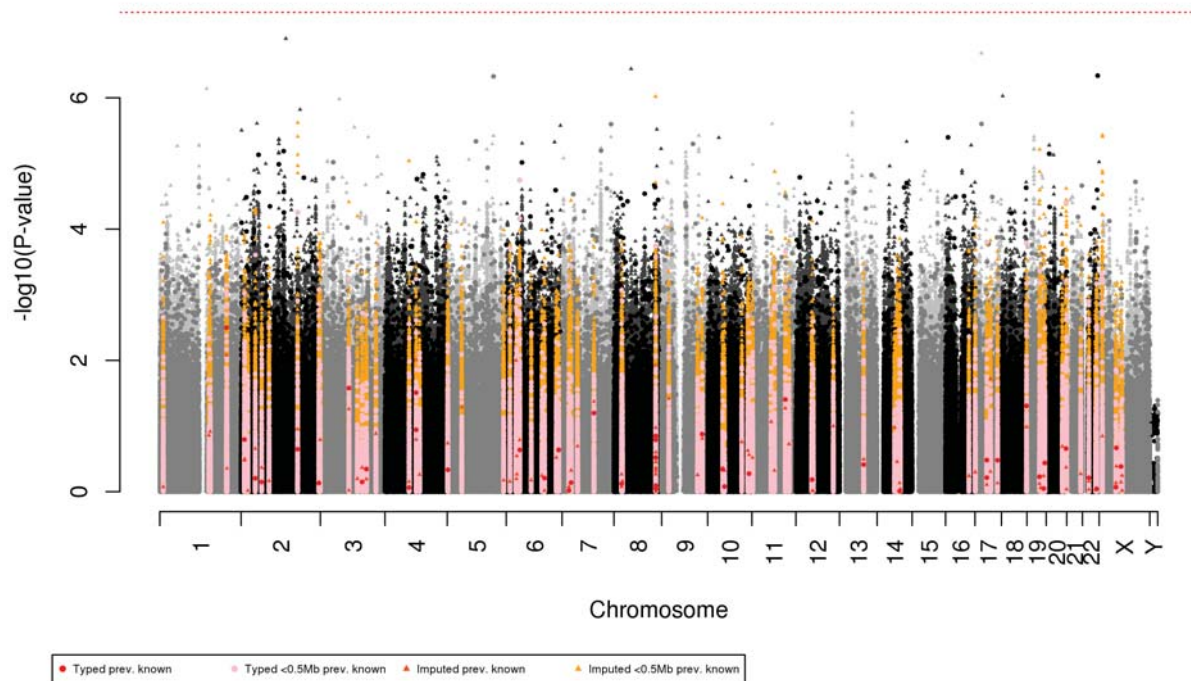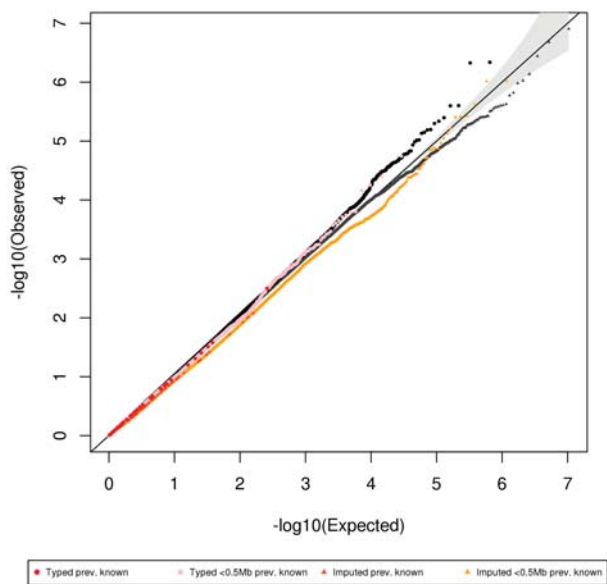

(S1.23) Round 3 of Meta-analysis fixed effects.  $\lambda = 1.053$

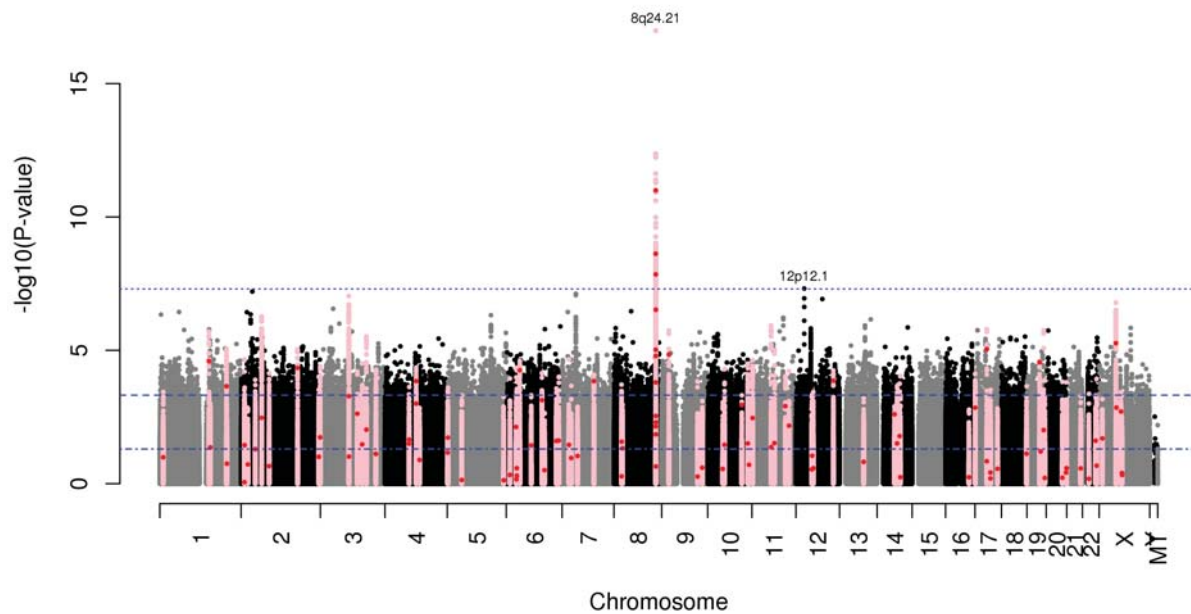

• Typed prev. known    • Typed <0.5Mb prev. known

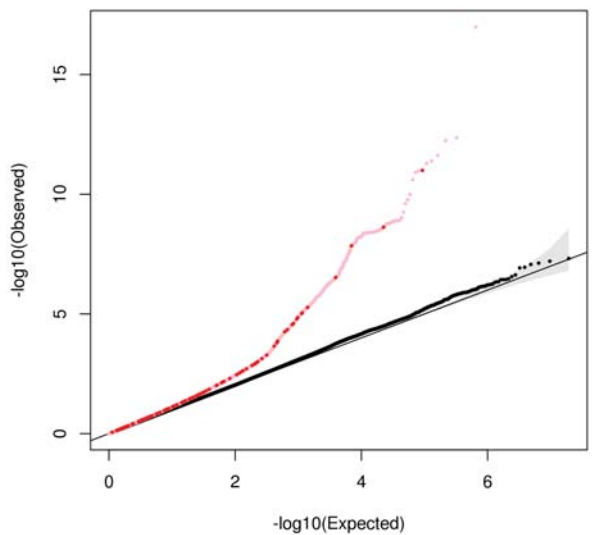

• Typed prev. known    • Typed <0.5Mb prev. known

(S1.24) Round 3 of Meta-analysis random effects.  $\lambda = 0.872$

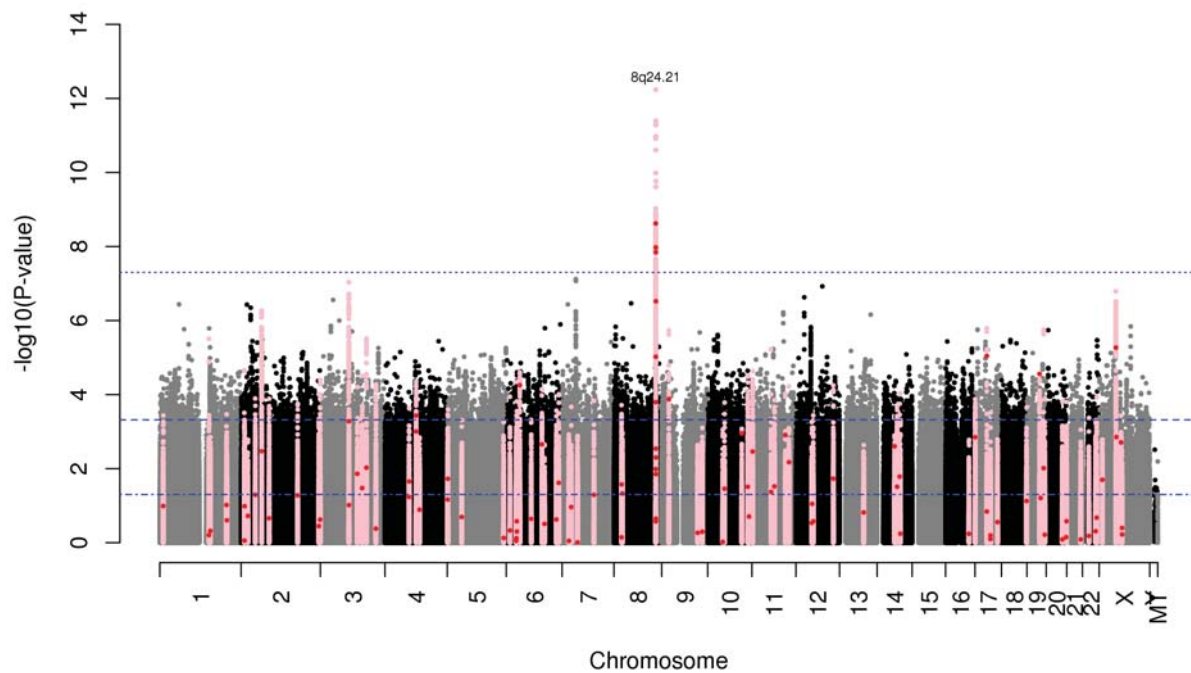

• Typed prev. known    • Typed <0.5Mb prev. known

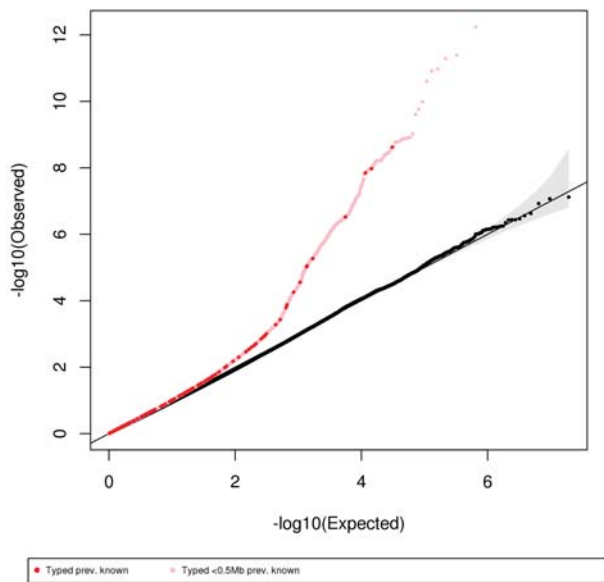

(S1.25) Round 4 of non-Hispanic white race/ethnicity.  $\lambda_{\text{typed}} = 1.065$ ,  $\lambda_{\text{imputed}} = 1.046$

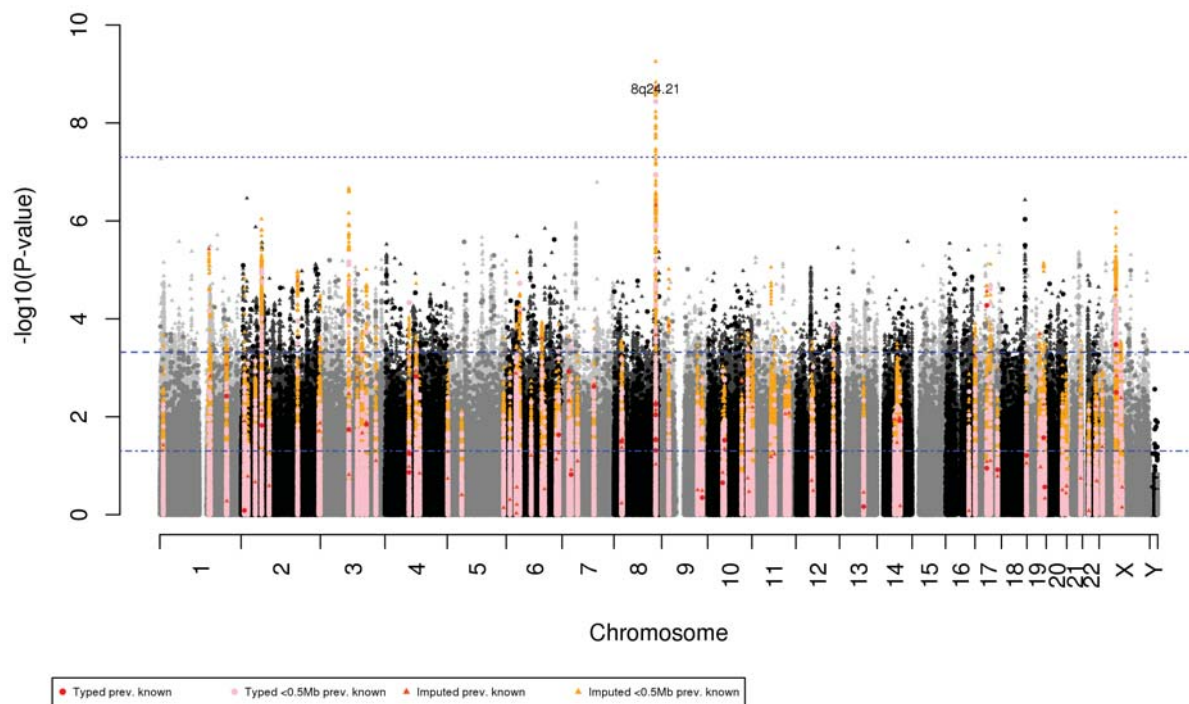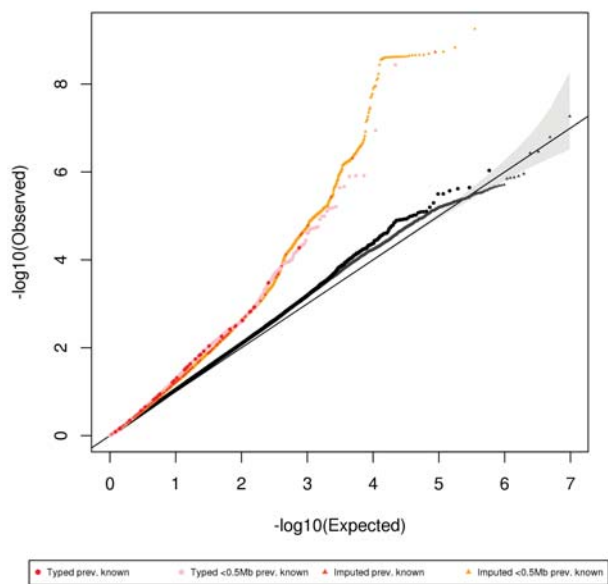

(S1.26) Round 4 of African American race/ethnicity.  $\lambda_{\text{typed}} = 1.035$ ,  $\lambda_{\text{imputed}} = 0.999$

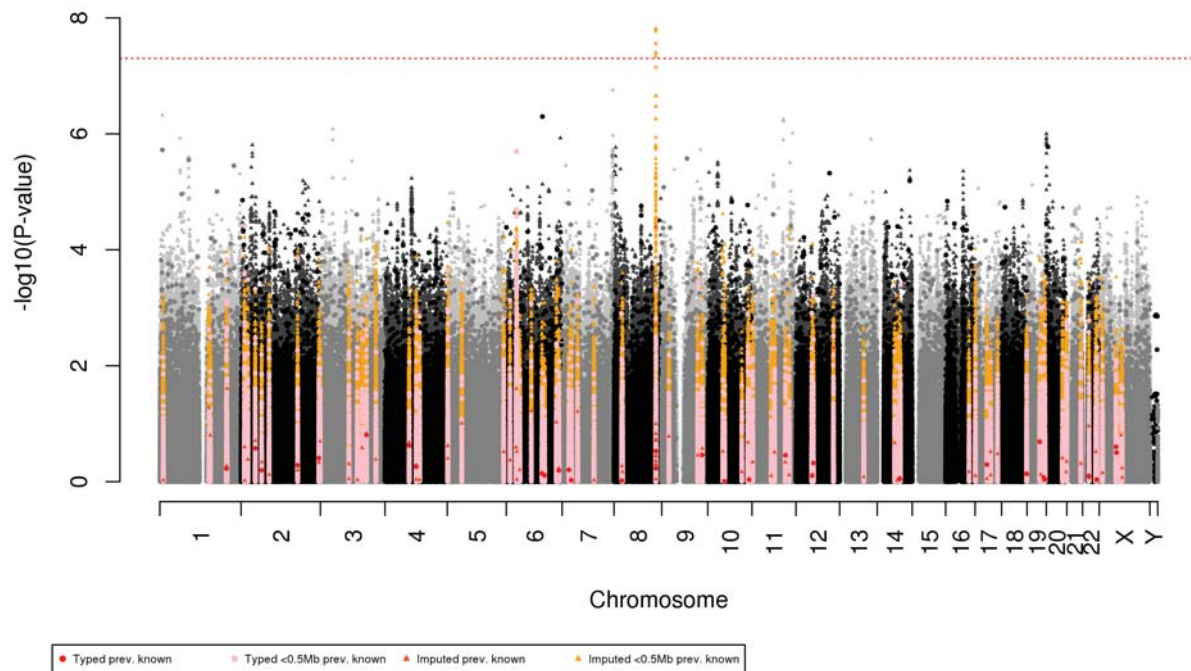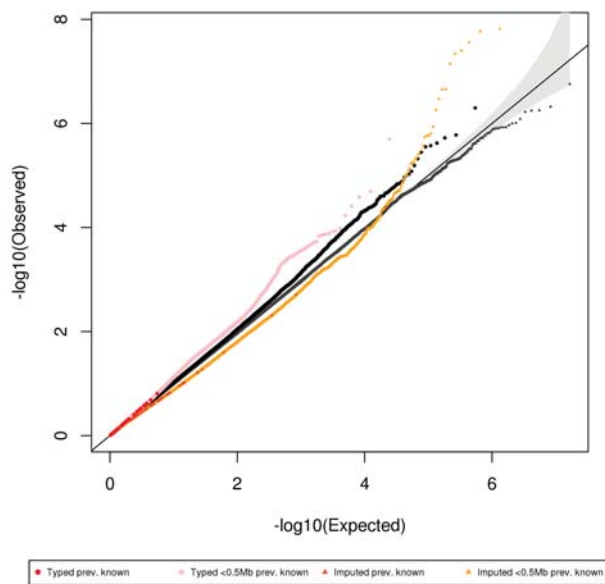



(S1.27) Round 4 of Asian race/ethnicity.  $\lambda_{\text{typed}} = 1.032$ ,  $\lambda_{\text{imputed}} = 0.985$

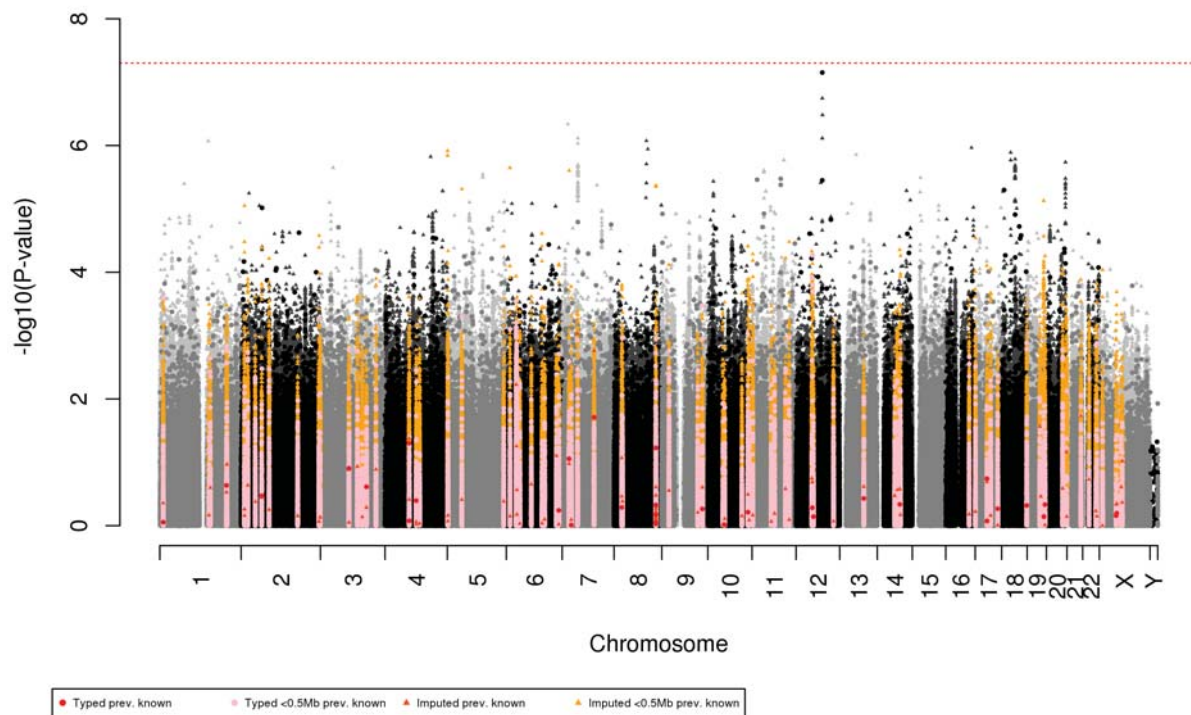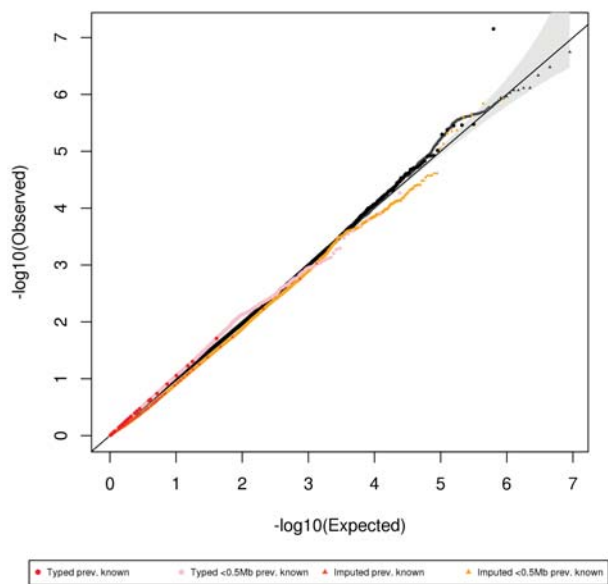



(S1.28) Round 4 of Latino race/ethnicity.  $\lambda_{\text{typed}} = 1.028$ ,  $\lambda_{\text{imputed}} = 0.997$

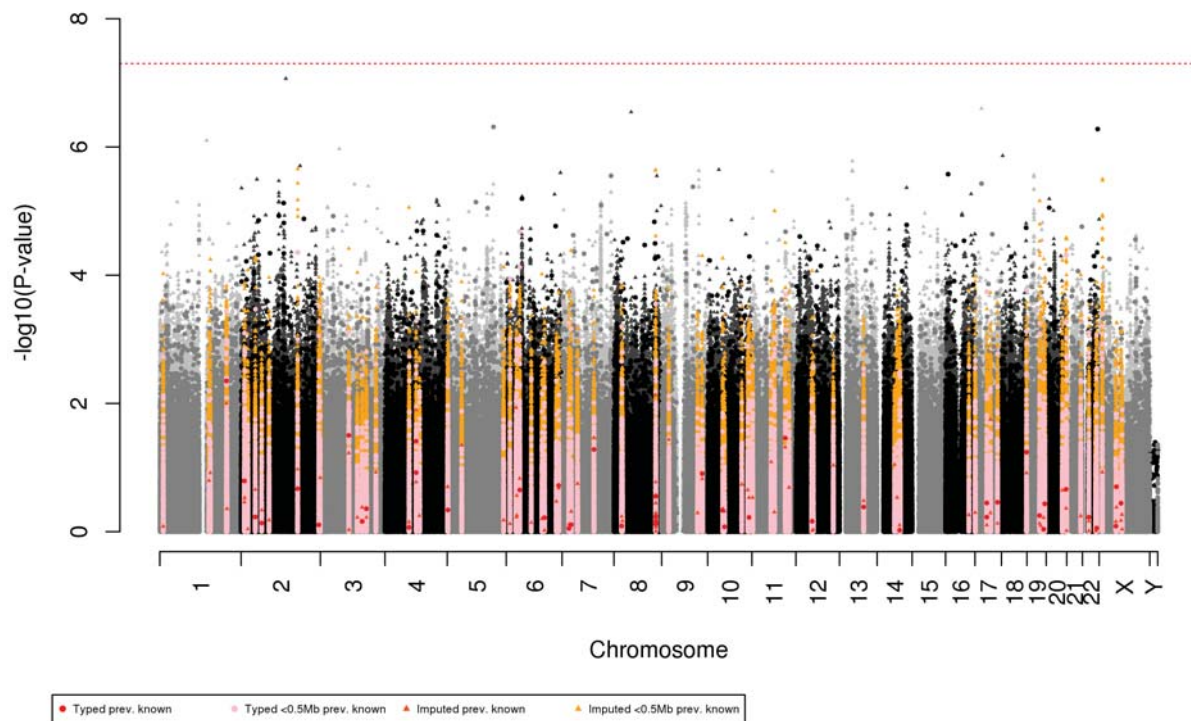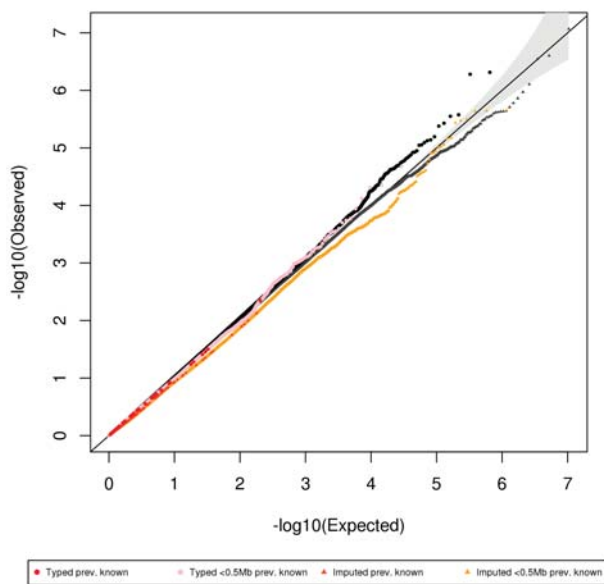

(S1.29) Round 4 of Meta-analysis fixed effects.  $\lambda = 1.055$

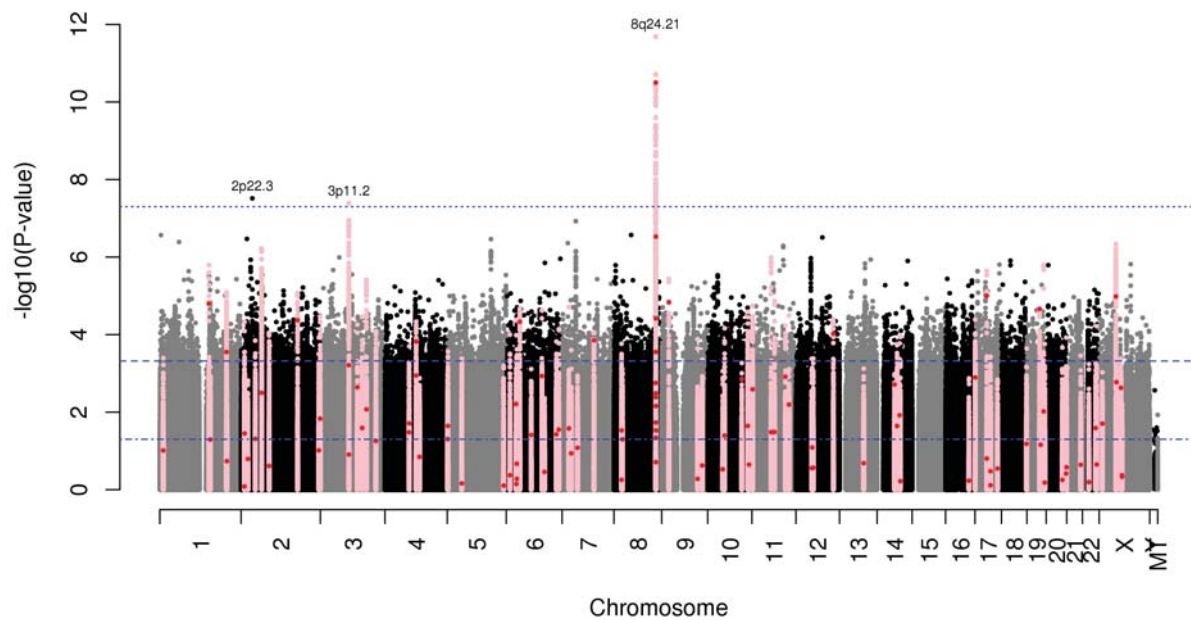

• Typed prev. known    • Typed <0.5Mb prev. known

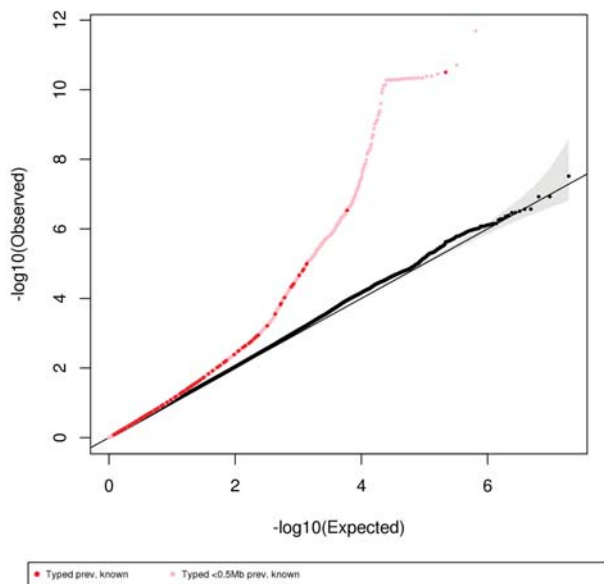

• Typed prev. known    • Typed <0.5Mb prev. known

(S1.30) Round 4 of Meta-analysis random effects.  $\lambda = 0.874$

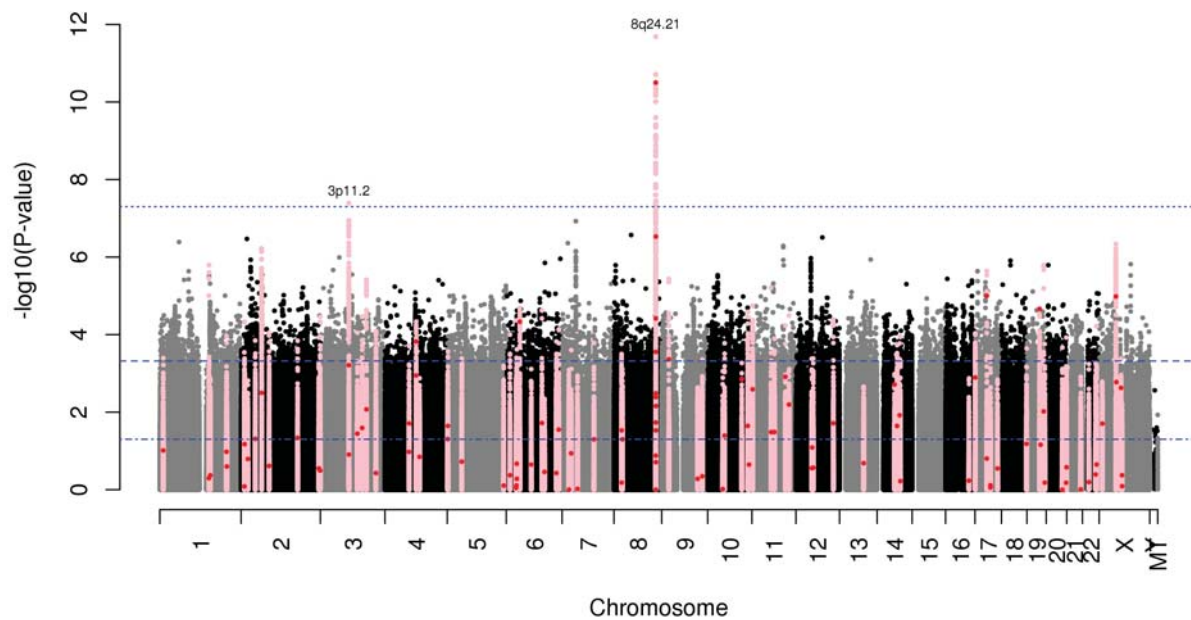

• Typed prev. known    • Typed <0.5Mb prev. known

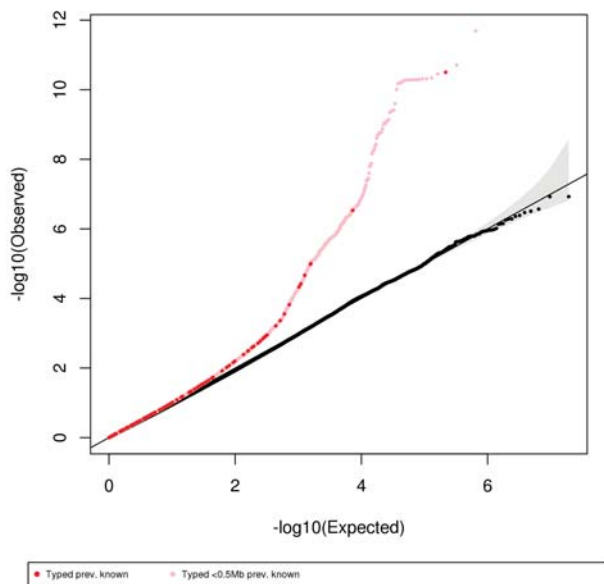

• Typed prev. known    • Typed <0.5Mb prev. known

(S1.31) Round 5 of non-Hispanic white race/ethnicity.  $\lambda_{\text{typed}} = 1.063$ ,  $\lambda_{\text{imputed}} = 1.045$

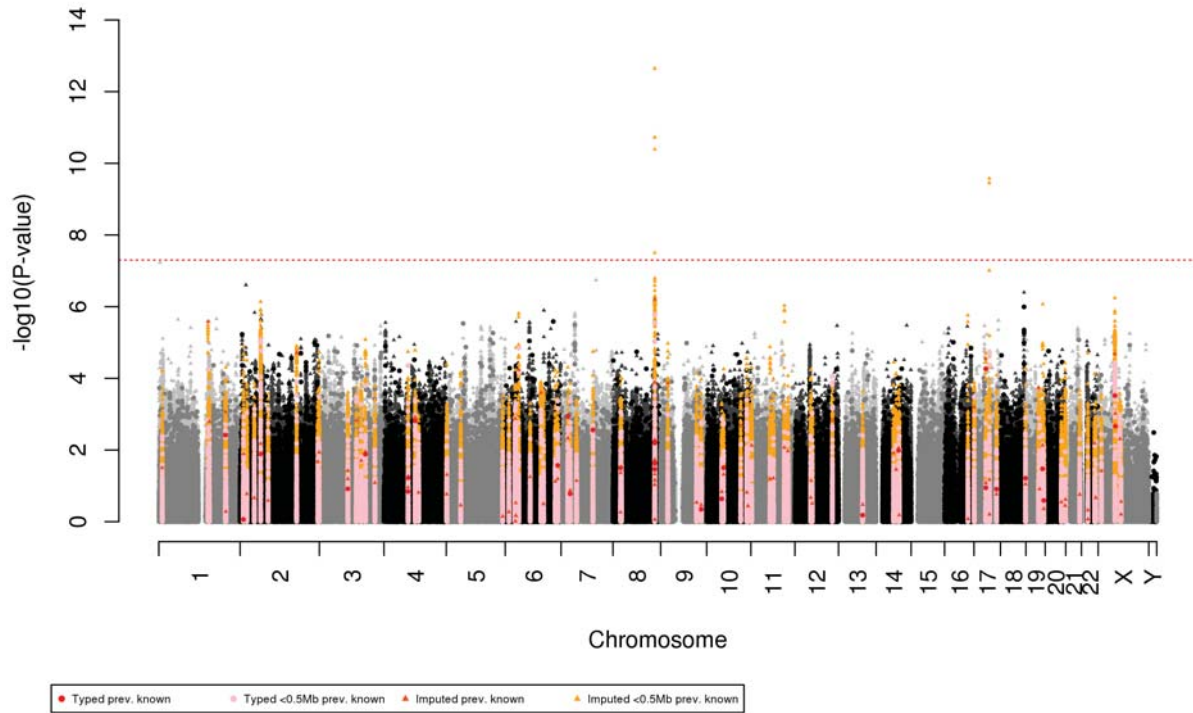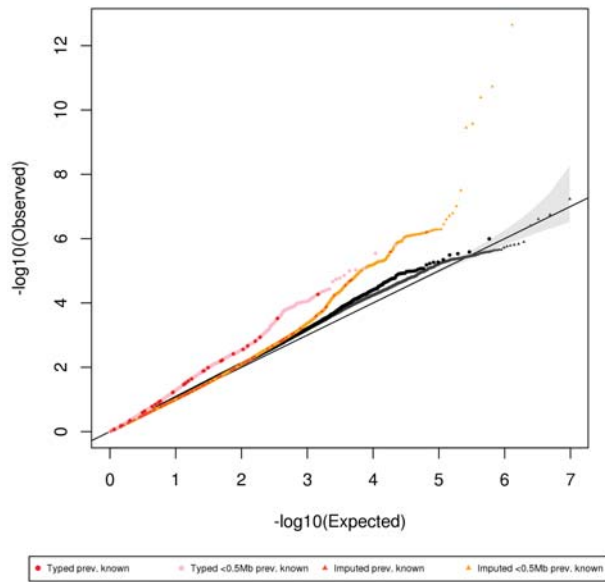

(S1.32) Round 5 of African American race/ethnicity.  $\lambda_{\text{typed}} = 1.037$ ,  $\lambda_{\text{imputed}} = 0.999$

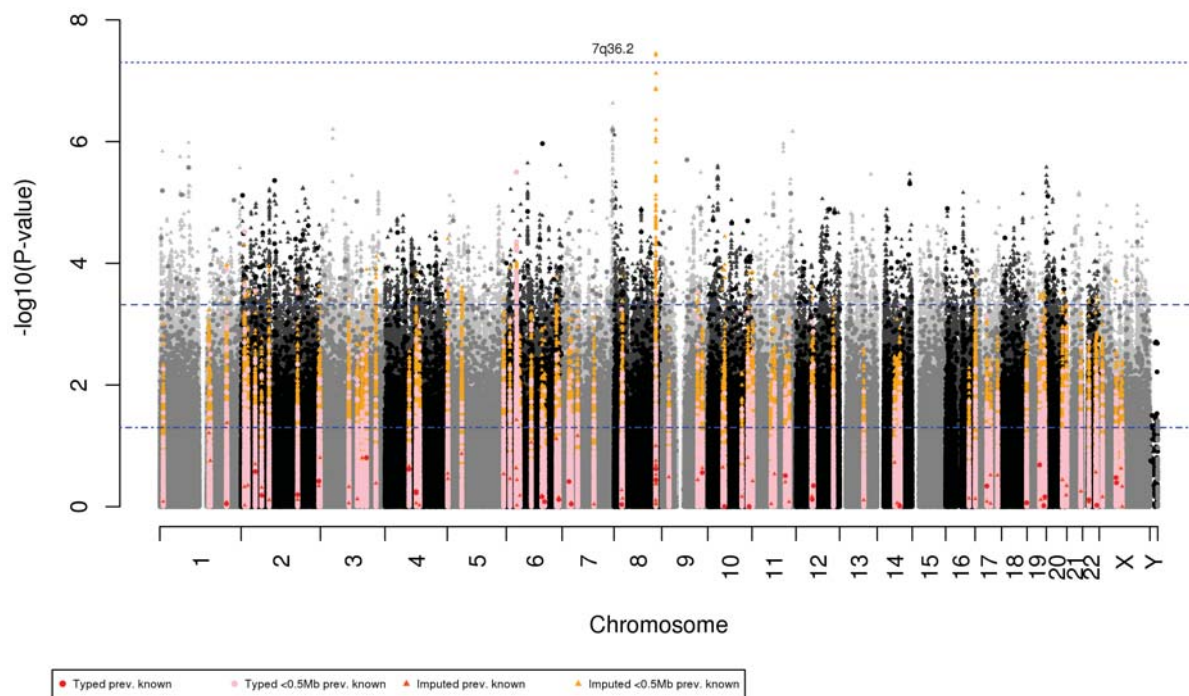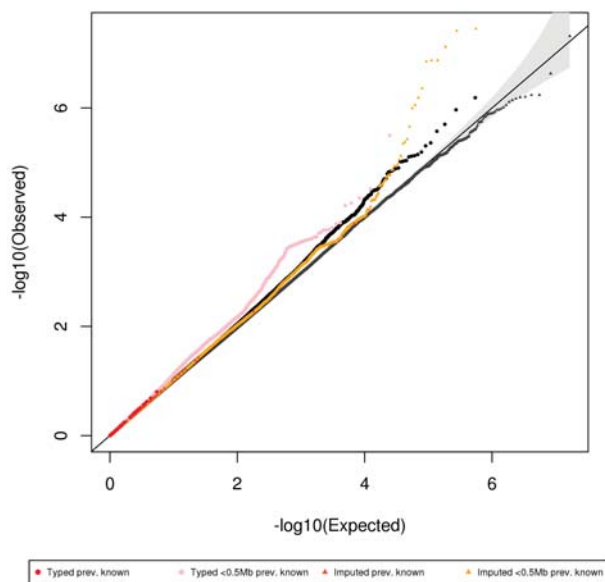

(S1.33) Round 5 of Asian race/ethnicity.  $\lambda_{\text{typed}} = 1.032$ ,  $\lambda_{\text{imputed}} = 0.984$

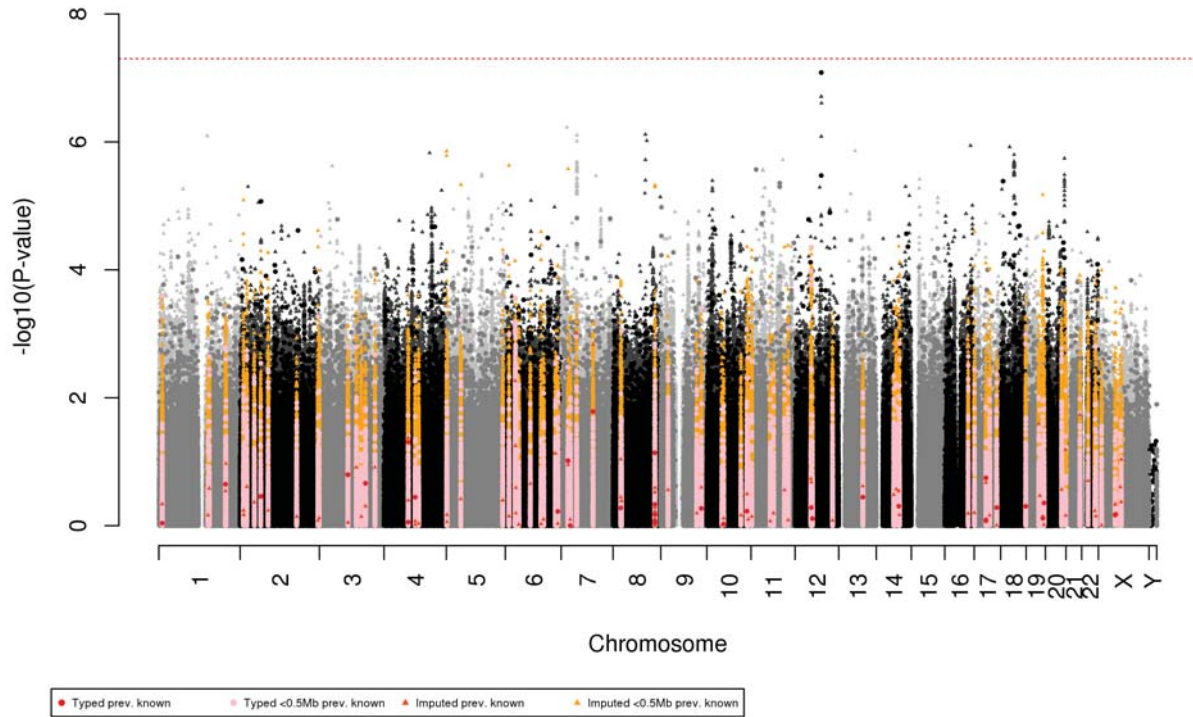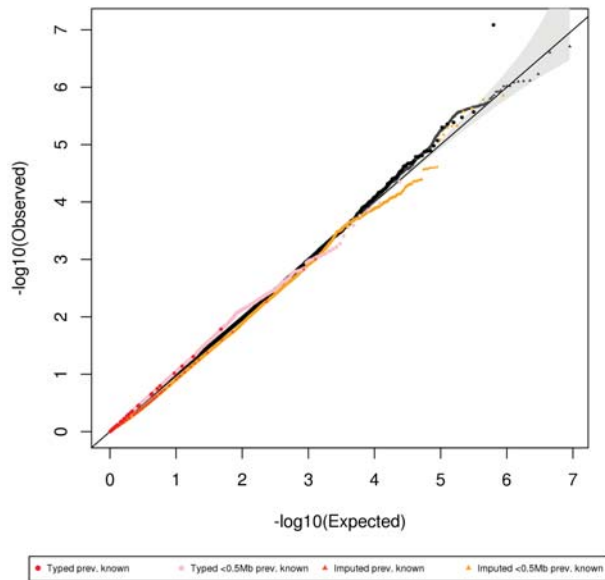



(S1.34) Round 5 of Latino race/ethnicity.  $\lambda_{\text{typed}} = 1.024$ ,  $\lambda_{\text{imputed}} = 0.995$

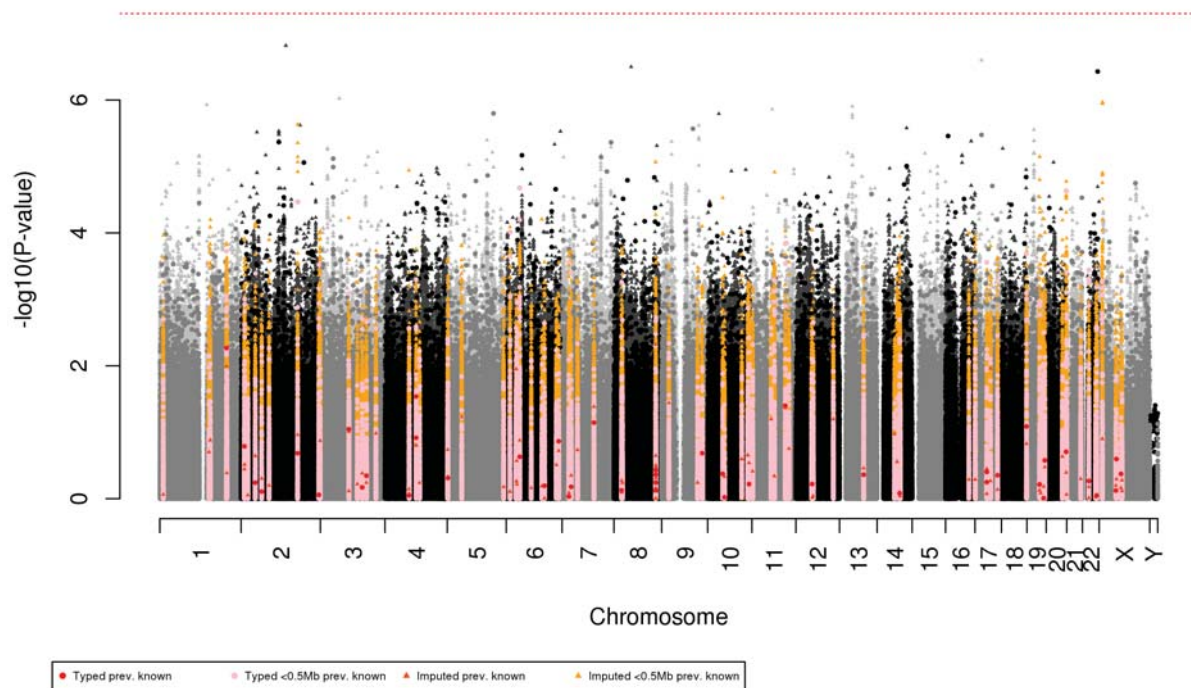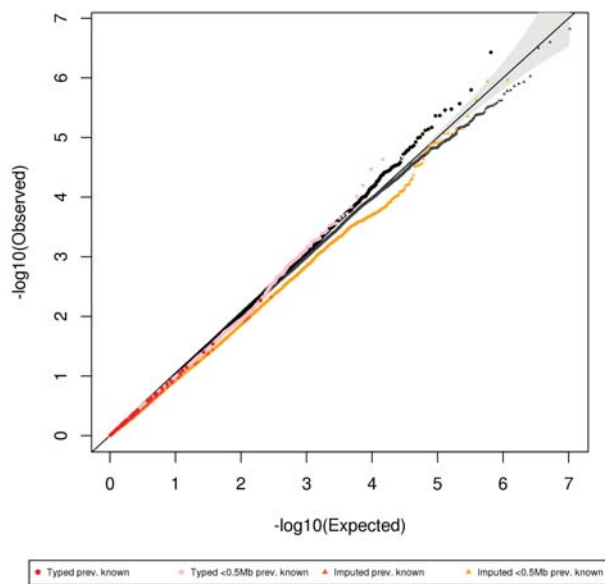



(S1.35) Round 5 of Meta-analysis fixed effects.  $\lambda = 1.057$

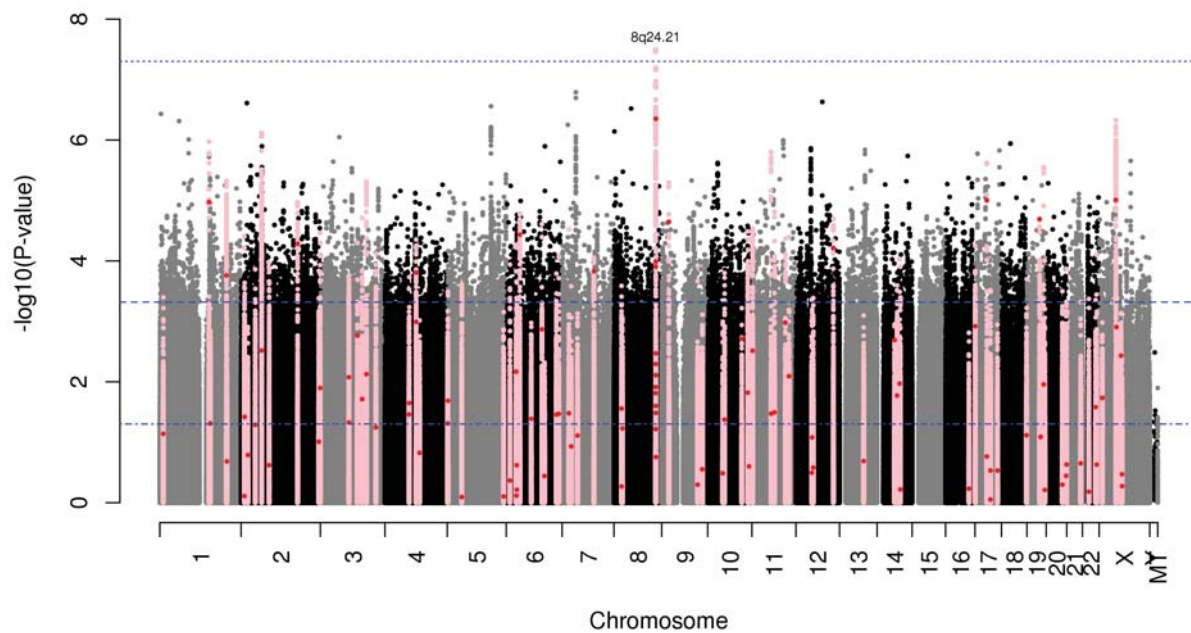

• Typed prev. known    • Typed <0.5Mb prev. known

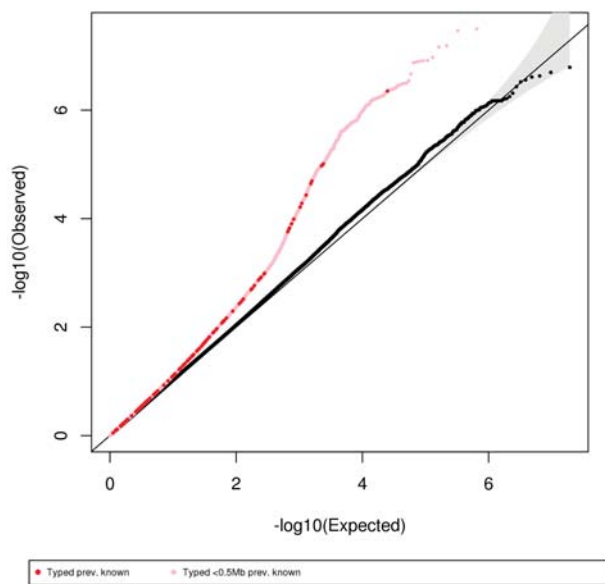

• Typed prev. known    • Typed <0.5Mb prev. known

(S1.36) Round 5 of Meta-analysis random effects.  $\lambda = 0.873$

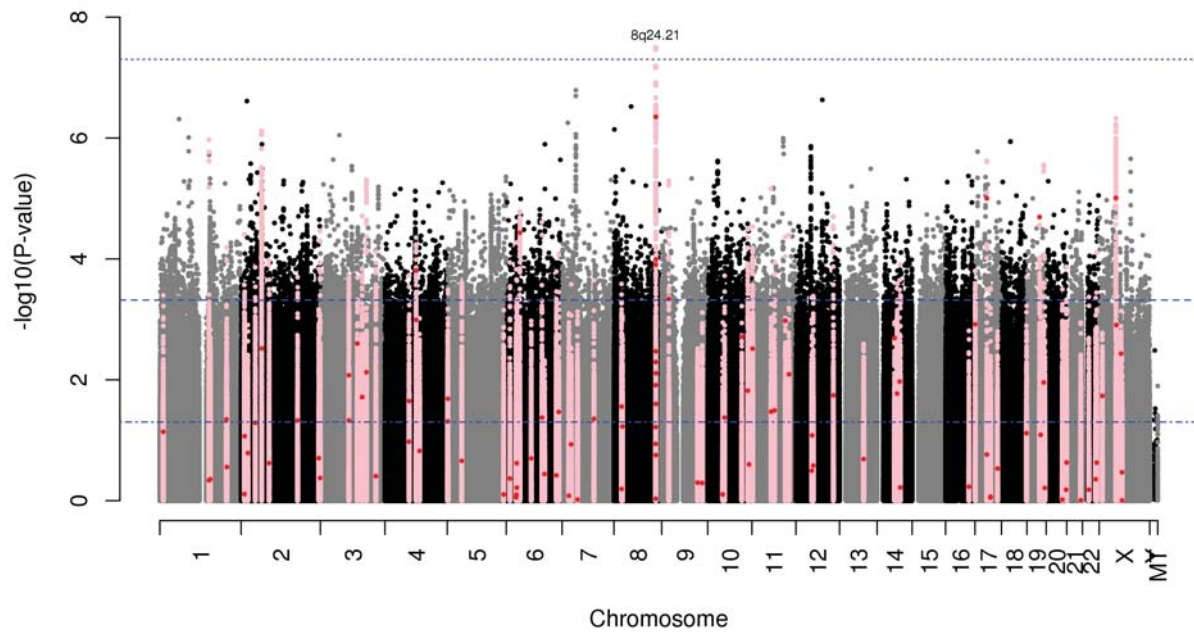

• Typed prev. known    • Typed <0.5Mb prev. known

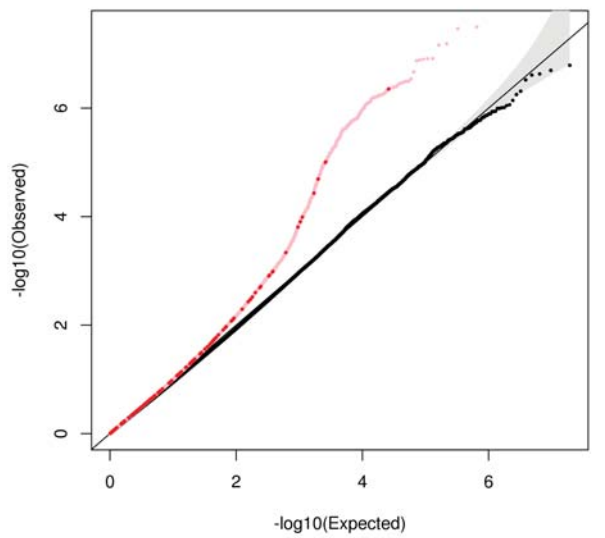

• Typed prev. known    • Typed <0.5Mb prev. known

**Figure S2:** Local plots of the novel replicated hit (rs4646284), and the suggestive locus (rs2659124), in the four Kaiser groups and the meta-analysis of the Kaiser groups. FE, fixed effects; RE, random effects.

(S2.1) rs4646284 (Unconditional) - KP NH white

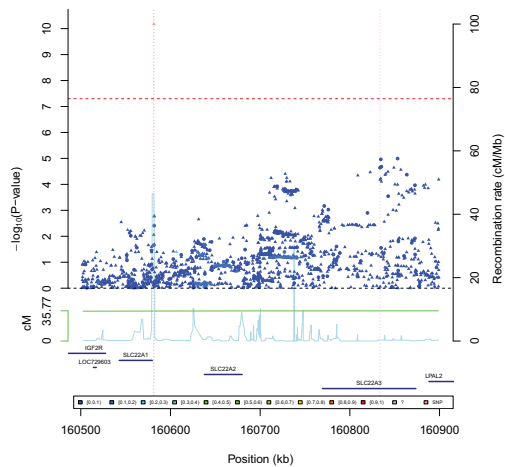

(S2.2) rs4646284 (Unconditional) - KP Af-Amer

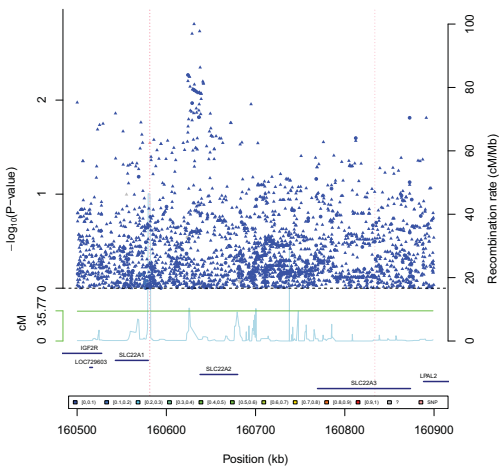

(S2.3) rs4646284 (Unconditional) - KP Asian

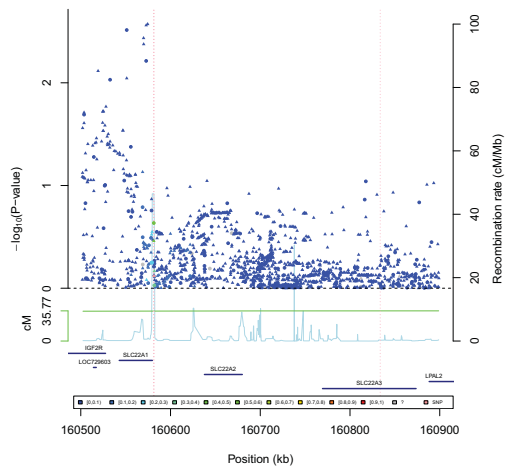

(S2.4) rs4646284 (Unconditional) - KP Latino

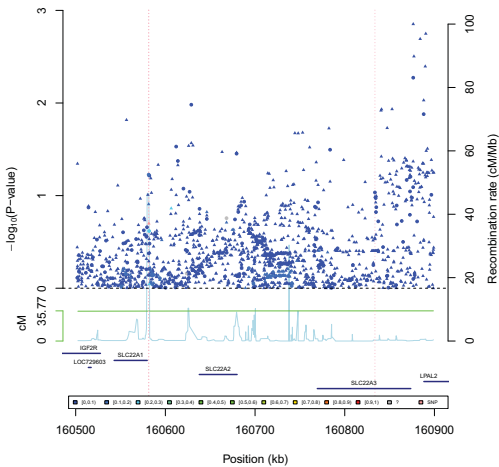

(S2.5) rs4646284 (Unconditional) - KP Meta FE (LD pattern EUR)

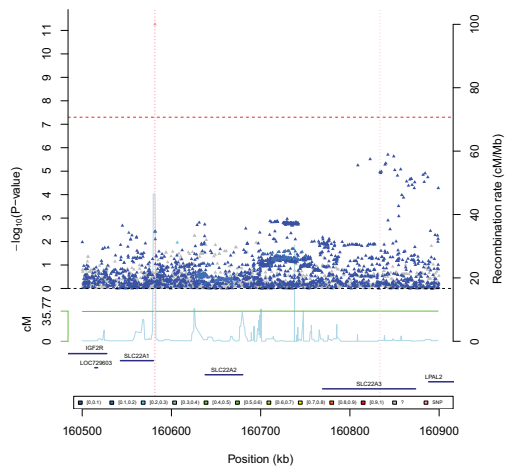

(S2.6) rs4646284 (Unconditional) - KP Meta RE (LD pattern EUR)

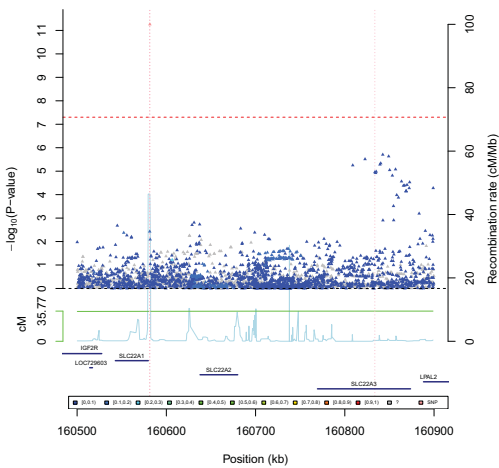

**(S2.7)** rs4646284 (Condition on rs9364554 and rs651164) - KP NH white

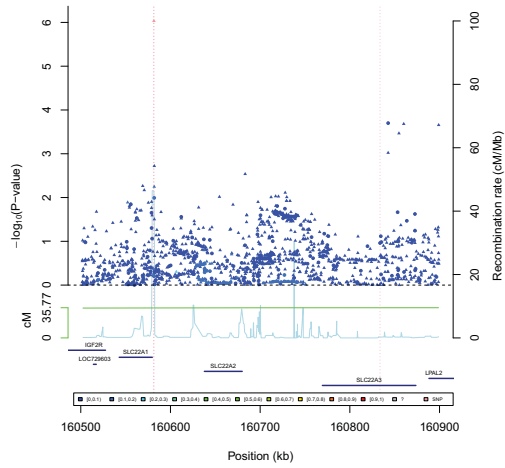

**(S2.8)** rs4646284 (Condition on rs9364554 and rs651164) - KP Af-Amer

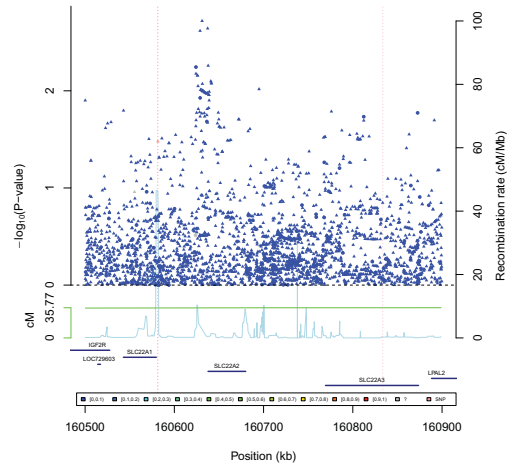

**(S2.9)** rs4646284 (Condition on rs9364554 and rs651164) - KP Asian

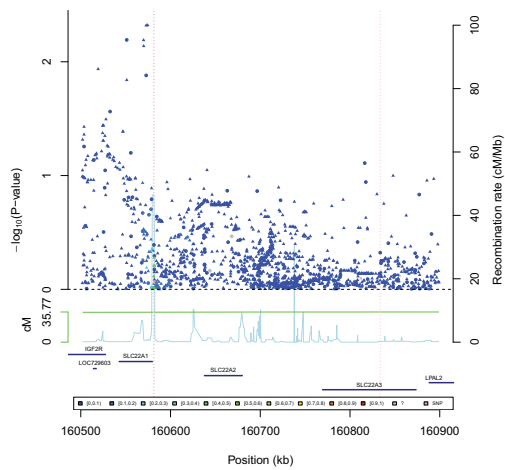

**(S2.10)** rs4646284 (Condition on rs9364554 and rs651164) - KP Latino

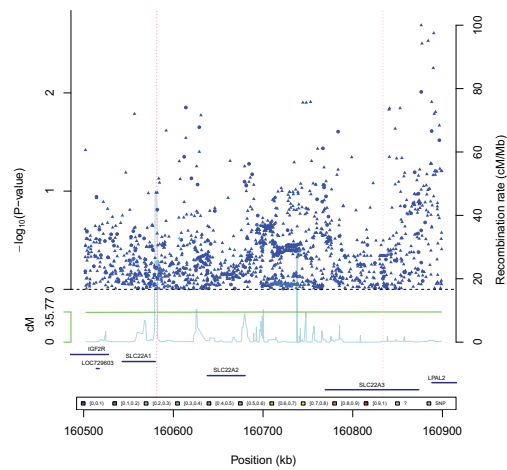

**(S2.11)** rs4646284 (Condition on rs9364554 and rs651164) - KP Meta FE (LD pattern EUR)

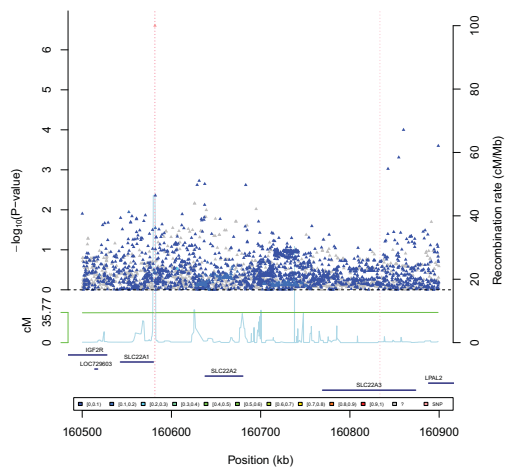

**(S2.12)** rs4646284 (Condition on rs9364554 and rs651164) - KP Meta RE (LD pattern EUR)

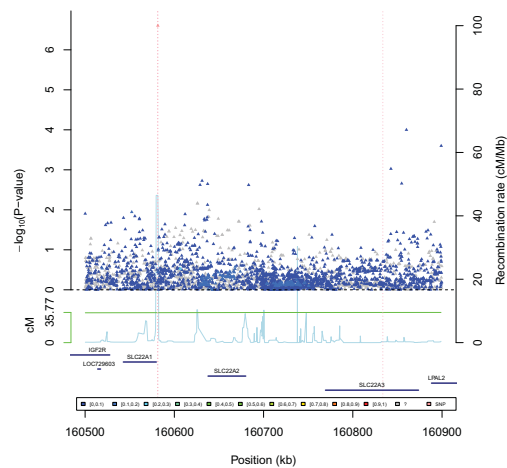

(S2.13) rs2659124 (Unconditional) - KP NH white

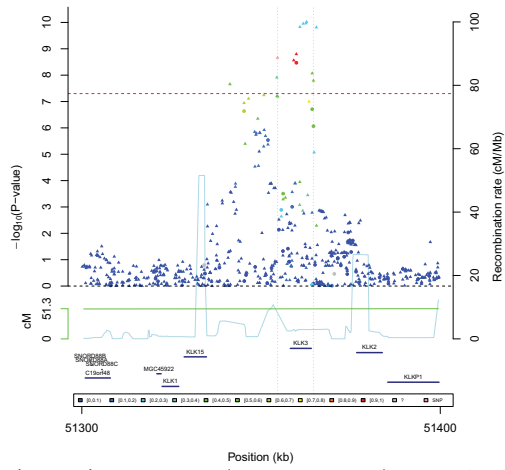

(S2.14) rs2659124 (Unconditional) - KP Af-Amer

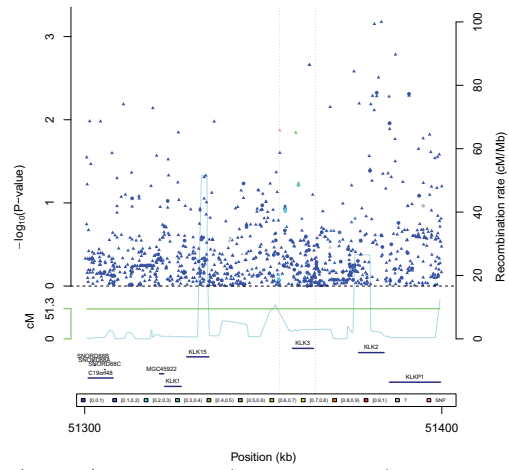

(S2.15) rs2659124 (Unconditional) - KP Asian

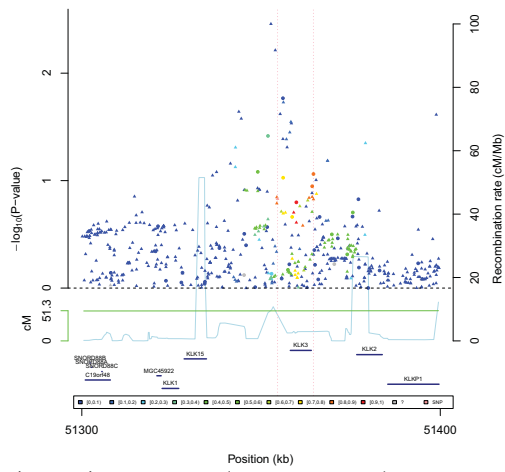

(S2.16) rs2659124 (Unconditional) - KP Latino

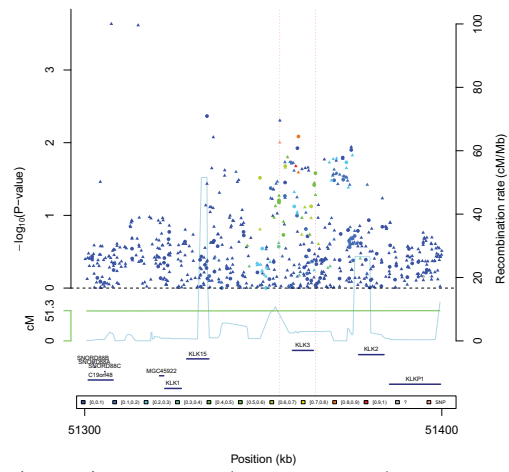

(S2.17) rs2659124 (Unconditional) - KP Meta FE (LD pattern EUR)

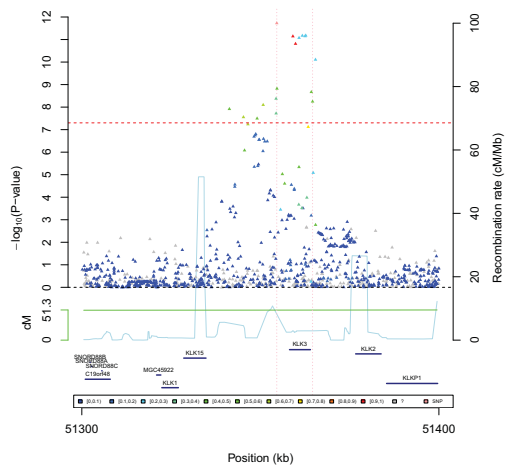

(S2.18) rs2659124 (Unconditional) - KP Meta RE (LD pattern EUR)

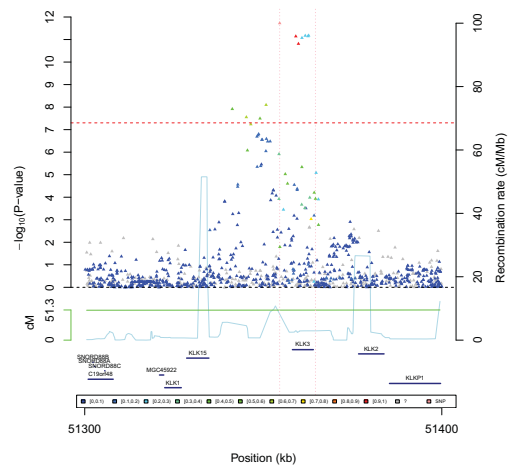

**(S2.19)** rs2659124 (Condition on rs2735839) - KP NH white

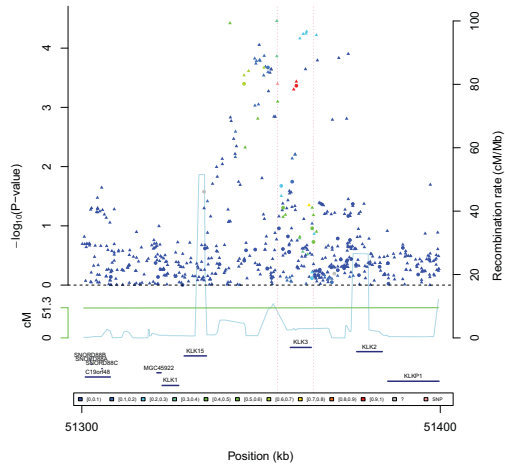

**(S2.20)** rs2659124 (Condition on rs2735839) - KP Af-Amer

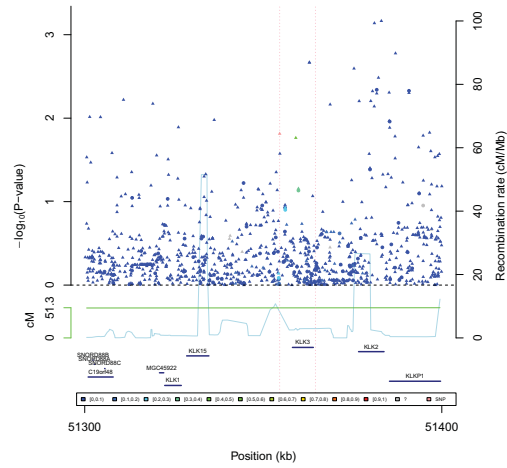

**(S2.21)** rs2659124 (Condition on rs2735839) - KP Asian

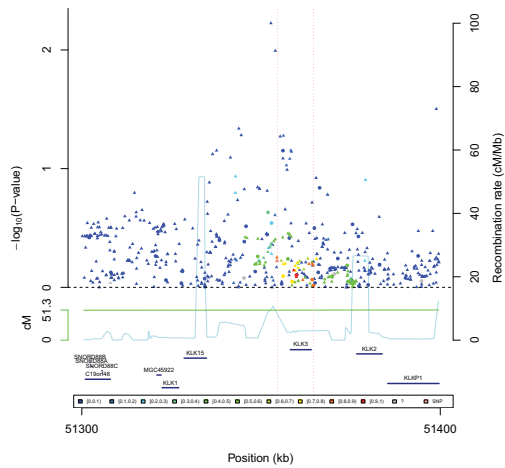

**(S2.22)** rs2659124 (Condition on rs2735839) - KP Latino

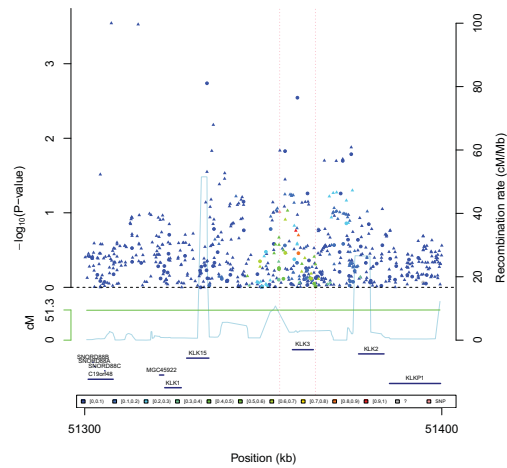

**(S2.23)** rs2659124 (Condition on rs2735839) - KP Meta FE (LD pattern EUR)

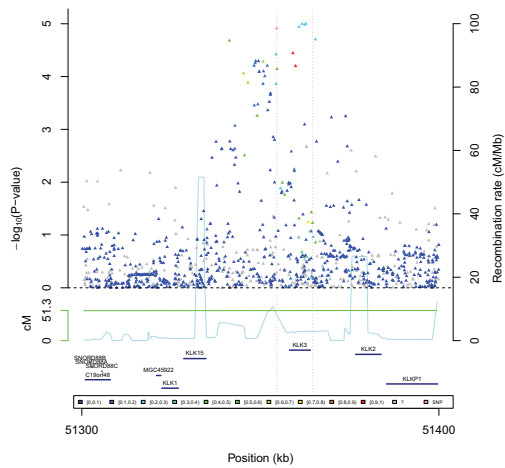

**(S2.24)** rs2659124 (Condition on rs2735839) - KP Meta RE (LD pattern EUR)

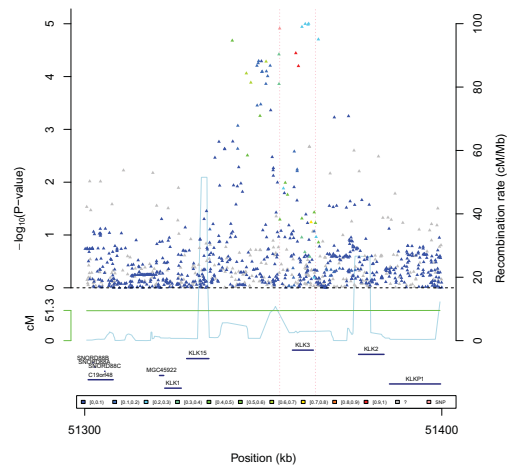

**Figure S3:** cis-eQTL for the two most significant genes (SLC22A1 and SLC22A3) surrounding the rs4646284 locus in the Mayo clinic dataset. The rs4646284 is the most significant locus at both genes, and is denoted in the figure by its b37 chromosome position chr6:160581543:I.

(S3.1) Cis-eQTL of SLC22A1

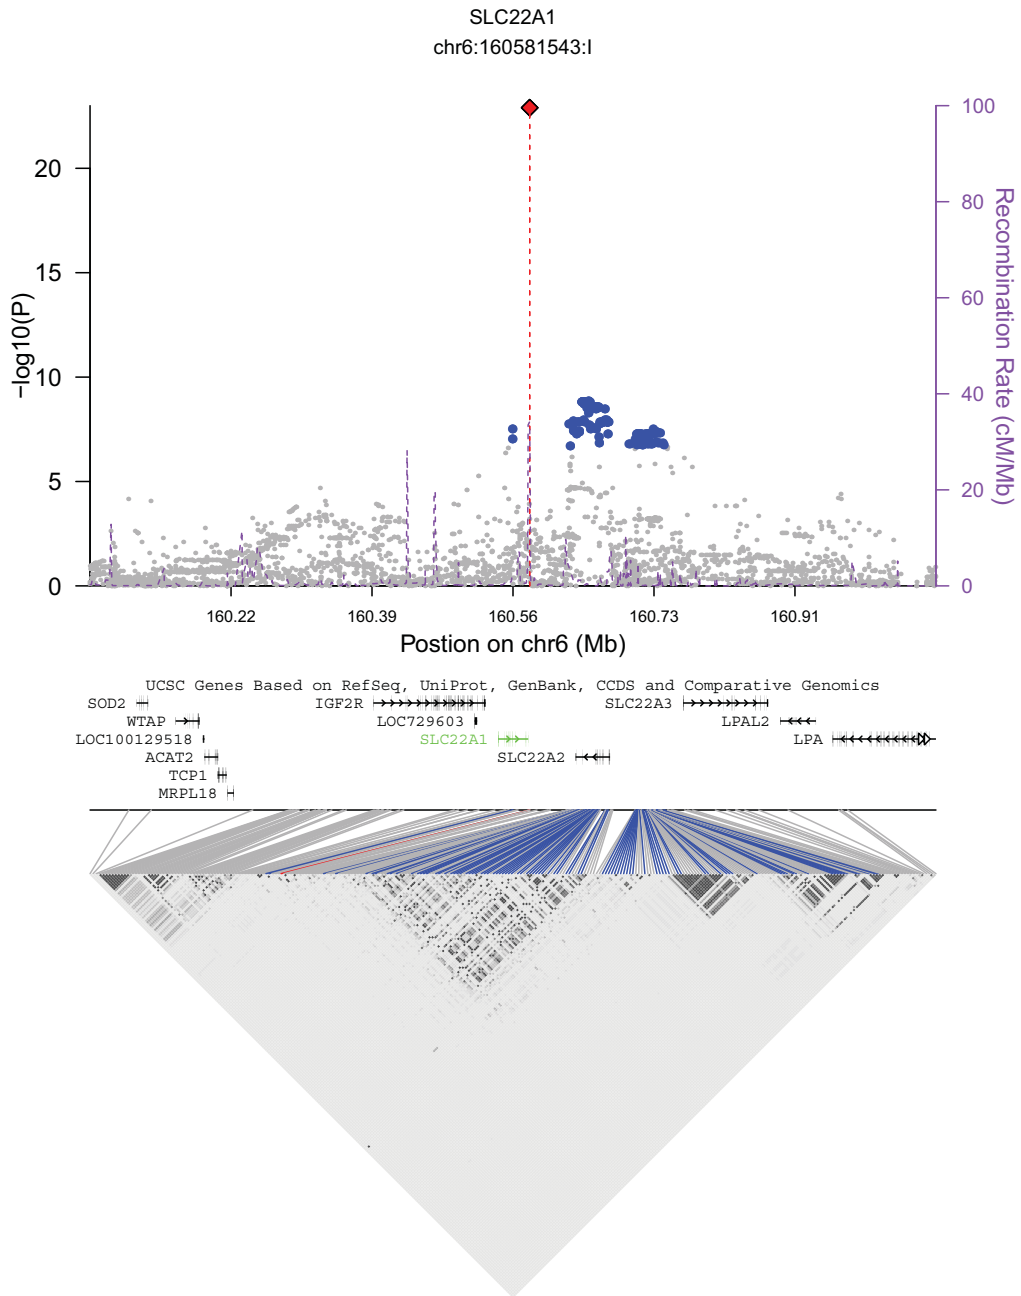





**Figure S4:** Comparison of variant associations from previous reports and results from each of the four major Kaiser race/ethnicity groups. Plotted values are the log odds ratios from pervious and current studies. Lines denote the 95% confidence intervals for the respective studies. The blue line is the  $y=x$  line, and the red line is the regression line (with no intercept).

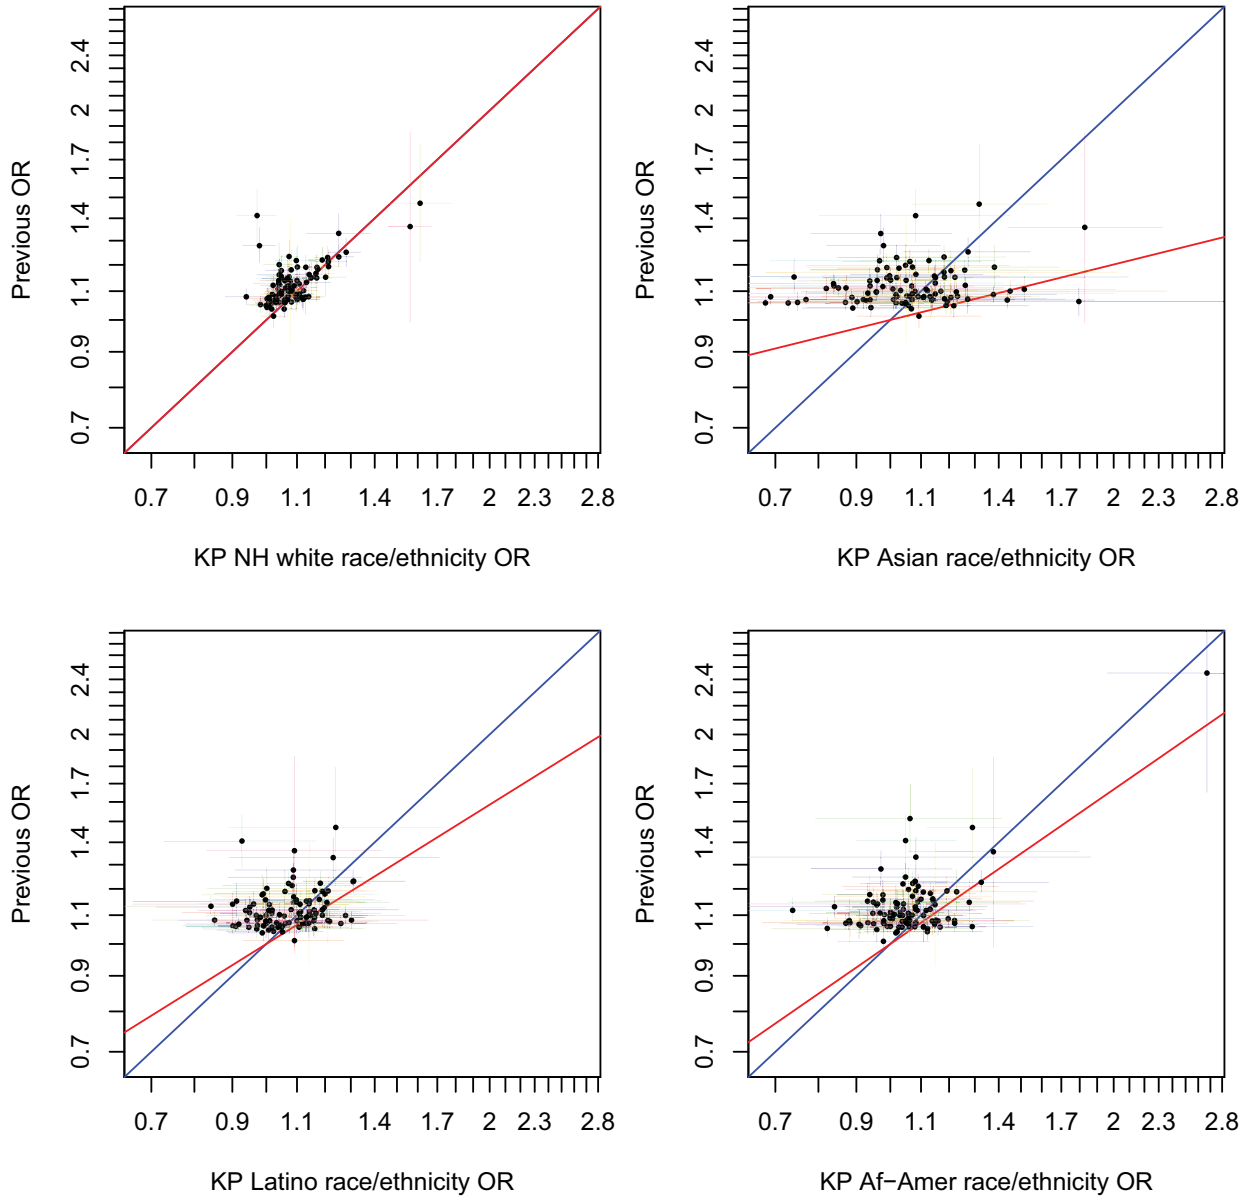

**Figure S5:** Prostate cancer AUC estimates for different combinations of covariates and the genetic risk score in the KP groups.

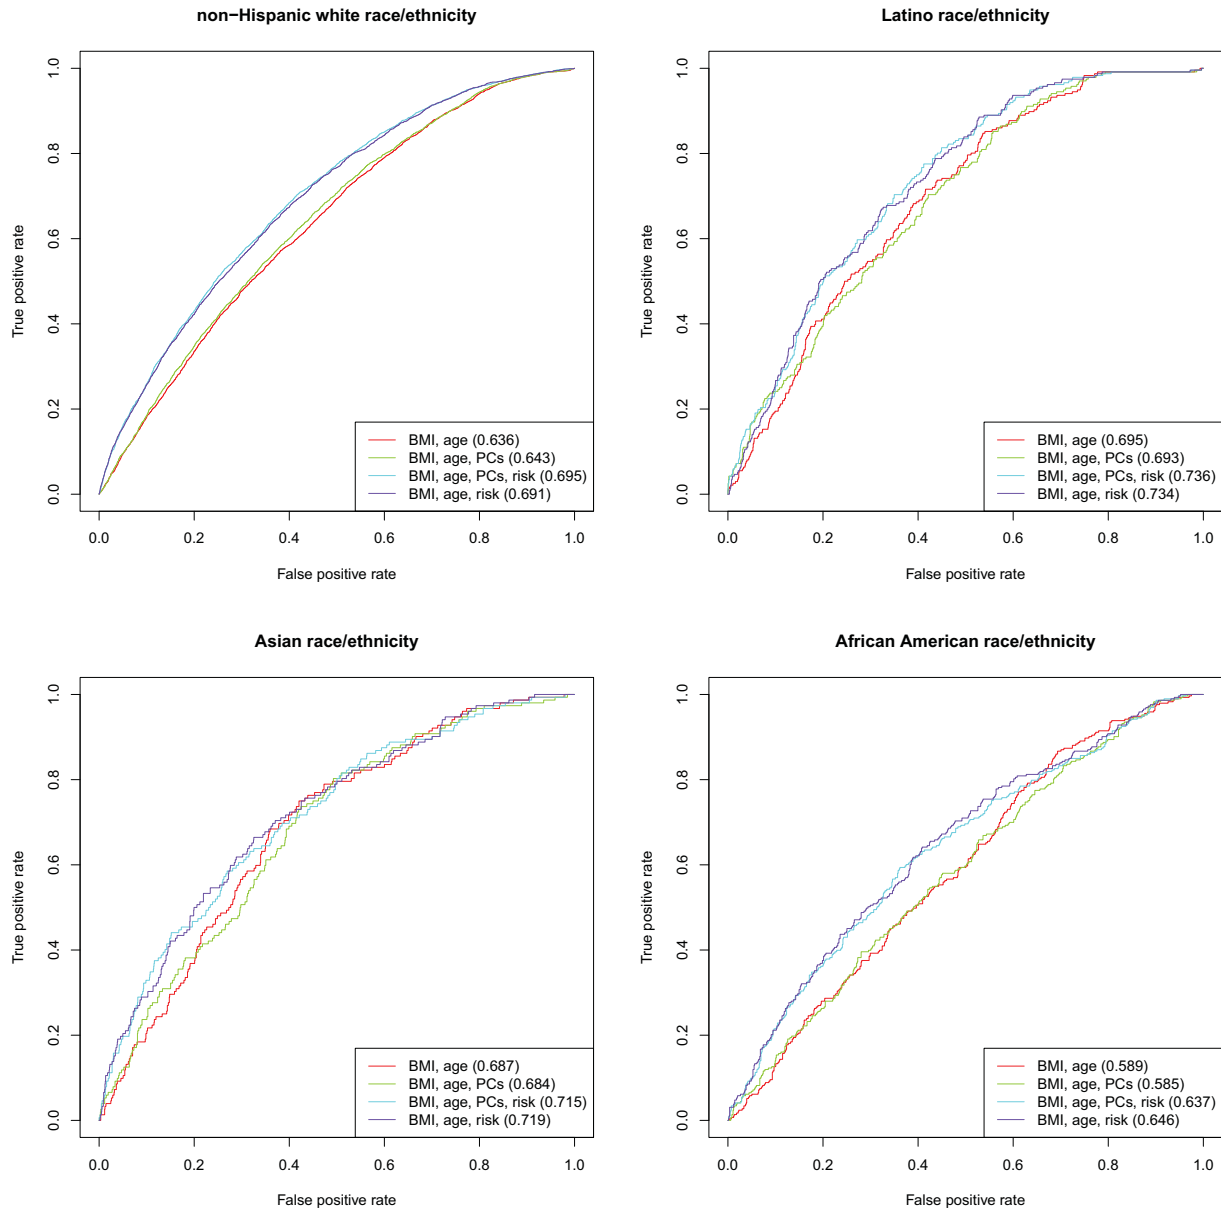

Supplement: NIHMS696674-supplement-1.pdf [file NIHMS696674-supplement-1.pdf]
